# Supplementary material for: Copper-catalyzed ring-opening trifluoromethylthiolation/trifluoromethylselenolation of cyclopropanols with TsSCF3orSe-(trifluoromethyl) 4-methoxybenzenesulfonoselenoate
Source: Royal Society of Chemistry journal article supplement (doi:10.1039/d3ob00228d), 2023-01-01

# Copper-Catalyzed Ring-Opening Trifluoromethylthiolation/ Trifluoromethylselenolation of Cyclopropanols with TsSCF<sub>3</sub> or Se- (trifluoromethyl) 4-methoxybenzenesulfonoselenoate

Ankun Li,<sup>a,c</sup> Xiaoxing Wang,<sup>a,c</sup> Yuqing Liu,<sup>a</sup> Delong Hao,<sup>a</sup> Xia Zhao,<sup>a,\*</sup> and Kui Lu<sup>b,\*</sup>

<sup>a</sup> College of Chemistry, Tianjin Key Laboratory of Structure and Performance for Functional Molecules, Key laboratory of Inorganic-organic Hybrid Functional Material Chemistry, Ministry of Education, Tianjin Normal University, Tianjin, China, 300387, [hxyzhx@mail.tjnu.edu.cn](mailto:hxyzhx@mail.tjnu.edu.cn)

<sup>b</sup> China International Science and Technology Cooperation Base of Food Nutrition/Safety and Medicinal Chemistry, College of Biotechnology, Tianjin University of Science & Technology, Tianjin, China, 300457, [lukui@tust.edu.cn](mailto:lukui@tust.edu.cn)

<sup>c</sup> These authors contributed equally to this work.

## Contents Page

|                                                                                |                |
|--------------------------------------------------------------------------------|----------------|
| <b>1. General Procedure for Preparation of cyclopropanols and cyclobutanol</b> | <b>S2</b>      |
| <b>2. Characterization data for compound 1</b>                                 | <b>S2-S8</b>   |
| <b>3. Reference</b>                                                            | <b>S8</b>      |
| <b>4. NMR spectra of 1</b>                                                     | <b>S9-S23</b>  |
| <b>5. NMR spectra of 3 and 4</b>                                               | <b>S24-S89</b> |

## 1) General Procedure for Preparation of cyclopropanols and cyclobutanol (**1**)<sup>1-5</sup>.

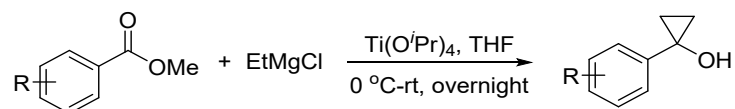

To a 200 mL round-bottomed flask was sequentially added ester (10 mmol, 1.0 eq.), titanium tetraisopropoxide (14 mmol, 1.4 eq.) and THF (40 mL). Then the solution was stirred at 0 °C followed by adding ethylmagnesium chloride (14 mL, 28 mmol, 2.8 eq., 2 M in THF) over 10 minutes. The suspension was warmed to room temperature and stirred overnight before quenching by slow addition of cold H<sub>2</sub>SO<sub>4</sub> solution (0.1 M, 40 mL). The mixture was extracted with ethyl acetate (40 mL×3). The combined organic layers were washed with brine (40 mL), dried over anhydrous Na<sub>2</sub>SO<sub>4</sub>, filtered and concentrated in vacuo to give a residue which was purified by silica gel column chromatography (ethyl acetate/petroleum ether) to afford the desired cyclopropanols (**1**).

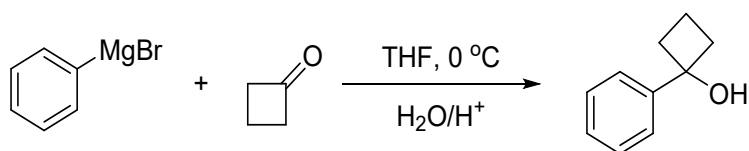

To a 100 mL flame-dried round-bottomed flask tube equipped with a magnetic stir bar was added cyclobutanone (10 mmol, 700 mg, 1.0 equiv.) and dry THF (10 mL), the reaction mixture was cooled to 0 °C, then phenylmagnesium bromide (20 mmol, 2.0 eq., 1.0 M in Et<sub>2</sub>O) was added drop wise over 30 min at 0 °C. The mixture was warmed to room temperature and was stirred overnight. Then the mixture was quenched with NH<sub>4</sub>Cl (aq). (10 mL) and extracted with ethyl acetate (30.0 mL×3). The combined organic phase was washed with brine (20 mL) and dried over anhydrous Na<sub>2</sub>SO<sub>4</sub>, filtered and concentrated in vacuo to give a residue which purified by column chromatography (eluent: petroleum ether: ethyl acetate = 10:1) to afford **1-phenylcyclobutan-1-ol**.

## 2) Characterization data for compound **1**

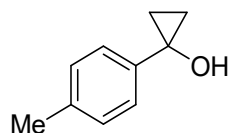

**1-(p-tolyl)cyclopropan-1-ol (1a)**: 755.8 mg, 51% yield ; a pale yellow oil; <sup>1</sup>H NMR (400 MHz, CDCl<sub>3</sub>): δ 7.18 (d, *J* = 8.0 Hz, 2H), 7.12 (d, *J* = 8.0 Hz, 2H), 2.32 (s, 3H), 1.19 (dd, *J*<sub>1</sub> = 7.5 Hz, *J*<sub>2</sub> = 5.2 Hz, 2H), 0.97 (dd, *J*<sub>1</sub> = 7.2 Hz, *J*<sub>2</sub> = 5.0 Hz, 2H).

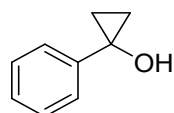

**1-phenylcyclopropan-1-ol (1b):** 506.6 mg, 74% yield; a colorless oil; <sup>1</sup>H NMR (400 MHz, CDCl<sub>3</sub>): δ 7.32 (s, 2H), 7.30 (d, *J* = 3.0 Hz, 2H), 7.24-7.20 (m, 1H), 2.37 (s, 1H), 1.24 (q, *J* = 5.4 Hz, 2H), 1.02 (q, *J* = 5.0 Hz, 2H).

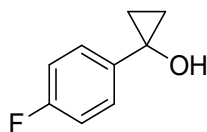

**1-(4-fluorophenyl)cyclopropan-1-ol (1c):** 1.2 g, 79% yield; a pale yellow solid; <sup>1</sup>H NMR (400 MHz, CDCl<sub>3</sub>): δ 7.27-7.24 (m, 2H), 7.00 (d, *J* = 8.6 Hz, 2H), 2.56 (s, 1H), 1.21 (dd, *J*<sub>1</sub> = 7.3 Hz, *J*<sub>2</sub> = 5.2 Hz, 2H), 0.97 (dd, *J*<sub>1</sub> = 7.4 Hz, *J*<sub>2</sub> = 5.3 Hz, 2H).

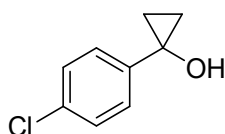

**1-(4-chlorophenyl)cyclopropan-1-ol (1d):** 450.0 mg, 27% yield; a light yellow solid; <sup>1</sup>H NMR (400 MHz, CDCl<sub>3</sub>): δ 7.28 (d, *J* = 8.7 Hz, 2H), 7.21 (d, *J* = 8.6 Hz, 2H), 2.21 (s, 1H), 1.27 (dd, *J*<sub>1</sub> = 7.5 Hz, *J*<sub>2</sub> = 5.5 Hz, 2H), 1.01 (dd, *J*<sub>1</sub> = 7.2 Hz, *J*<sub>2</sub> = 5.1 Hz, 2H).

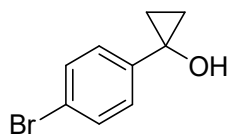

**1-(4-bromophenyl)cyclopropan-1-ol (1e):** 469.5mg, 43% yield; a white solid; <sup>1</sup>H NMR (400 MHz, CDCl<sub>3</sub>): δ 7.44 (d, *J* = 8.5 Hz, 2H), 7.16 (d, *J* = 8.5 Hz, 2H), 1.99 (s, 1H), 1.28 (dd, *J*<sub>1</sub> = 7.5 Hz, *J*<sub>2</sub> = 5.4 Hz, 2H), 1.02 (dd, *J*<sub>1</sub> = 7.2 Hz, *J*<sub>2</sub> = 5.1 Hz, 2H).

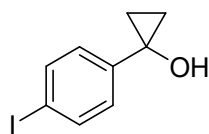

**1-(4-iodophenyl)cyclopropan-1-ol (1f):** 660.0 mg, 25% yield; a white solid; <sup>1</sup>H NMR (400 MHz, CDCl<sub>3</sub>): δ 7.17 (d, *J* = 5.0 Hz, 1H), 6.97-6.89 (m, 2H), 6.86 (d, *J* = 3.3 Hz, 1H), 2.81 (s, 1H), 1.28 (dd, *J*<sub>1</sub> = 7.4 Hz, *J*<sub>2</sub> = 5.5 Hz, 2H), 1.05 (dd, *J*<sub>1</sub> = 7.0 Hz, *J*<sub>2</sub> = 5.1 Hz, 2H).

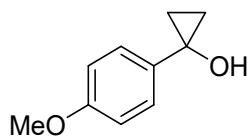

**1-(4-methoxyphenyl)cyclopropan-1-ol (1g):** 476.2 mg, 29% yield; a pale yellow solid; <sup>1</sup>H NMR (400 MHz, CDCl<sub>3</sub>): δ 7.28-7.26 (m, 2H), 6.88-6.86 (m, 2H), 3.80 (s, 3H), 1.83 (s, 1H), 1.20 (dd, *J*<sub>1</sub>

= 7.3 Hz,  $J_2 = 5.1$  Hz, 2H), 0.98 (dd,  $J_1 = 7.2$  Hz,  $J_2 = 5.1$  Hz, 2H).

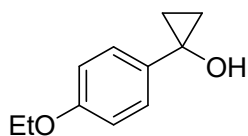

**1-(4-ethoxyphenyl)cyclopropan-1-ol (1h):** 1.0 g, 58% yield; a pale yellow solid;  $^1\text{H NMR}$  (400 MHz,  $\text{CDCl}_3$ ):  $\delta$  7.27 (d,  $J = 2.4$  Hz, 1H), 7.24 (t,  $J = 2.0$  Hz, 1H), 6.87-6.85 (m, 2H), 4.02 (q,  $J = 7.0$  Hz, 2H), 1.41 (t,  $J = 7.0$  Hz, 3H), 1.19 (dd,  $J_1 = 8.1$  Hz,  $J_2 = 6.2$  Hz, 2H), 0.97 (dd,  $J_1 = 7.0$  Hz,  $J_2 = 5.0$  Hz, 2H).

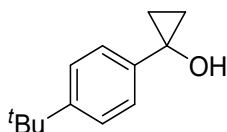

**1-(4-(tert-butyl)phenyl)cyclopropan-1-ol (1i):** 583.9 mg, 61% yield; a colorless oil;  $^1\text{H NMR}$  (400 MHz,  $\text{CDCl}_3$ ):  $\delta$  7.38 (d,  $J = 2.8$  Hz, 1H), 7.36 (d,  $J = 3.0$  Hz, 1H), 7.27 (d,  $J = 2.2$  Hz, 1H), 7.24 (t,  $J = 2.0$  Hz, 1H), 1.32 (s, 9H), 1.24 (dd,  $J_1 = 7.3$  Hz,  $J_2 = 5.0$  Hz, 2H), 1.03 (dd,  $J_1 = 7.5$  Hz,  $J_2 = 5.2$  Hz, 2H).

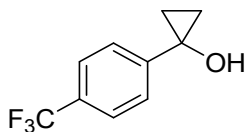

**1-(4-(trifluoromethyl)phenyl)cyclopropan-1-ol (1j):** 652.3 mg, 32% yield; a light yellow oil;  $^1\text{H NMR}$  (400 MHz,  $\text{CDCl}_3$ ):  $\delta$  7.57 (d,  $J = 8.3$  Hz, 2H), 7.37 (d,  $J = 8.2$  Hz, 2H), 2.18 (s, 1H), 1.36 (dd,  $J_1 = 7.7$ ,  $J_2 = 5.5$  Hz, 2H), 1.10 (dd,  $J_1 = 7.3$  Hz,  $J_2 = 5.2$  Hz, 2H).

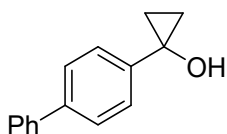

**1-(1,1'-biphenyl-4-yl)cyclopropan-1-ol (1k):** 329.3 mg, 16% yield; a light yellow solid;  $^1\text{H NMR}$  (400 MHz,  $\text{CDCl}_3$ ):  $\delta$  7.58 (t,  $J = 8.1$  Hz, 4H), 7.44 (t,  $J = 7.8$  Hz, 2H), 7.38 (d,  $J = 8.3$  Hz, 2H), 7.34 (t,  $J = 7.4$  Hz, 1H), 2.34 (s, 1H), 1.31 (dd,  $J_1 = 7.6$ ,  $J_2 = 5.4$  Hz, 2H), 1.10 (dd,  $J_1 = 7.2$  Hz,  $J_2 = 5.0$  Hz, 2H).

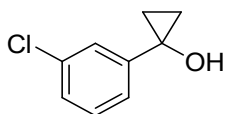

**1-(3-chlorophenyl)cyclopropan-1-ol (1l):** 930.0 mg, 58% yield; a light yellow oil;  $^1\text{H NMR}$  (400 MHz,  $\text{CDCl}_3$ ):  $\delta$  7.27 (t,  $J = 1.8$  Hz, 1H), 7.23 (d,  $J = 3.2$  Hz, 1H), 7.18 (t,  $J = 1.4$  Hz, 1H), 7.10 (dt,

$J_1 = 7.6, J_2 = 1.4$  Hz, 1H), 2.57 (s, 1H), 1.25 (dd,  $J_1 = 7.4, J_2 = 5.3$  Hz, 2H), 1.01 (dd,  $J_1 = 7.2$  Hz,  $J_2 = 5.1$  Hz, 2H).

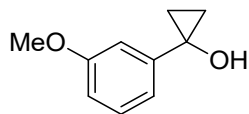

**1-(3-methoxyphenyl)cyclopropan-1-ol (1m):** 656.8 mg, 40% yield; a light yellow oil;  $^1\text{H}$  NMR (400 MHz,  $\text{CDCl}_3$ ):  $\delta$  7.13 (t,  $J = 8.0$  Hz, 1H), 6.81 (d,  $J = 2.3$  Hz, 1H), 6.72 (d,  $J = 6.8$  Hz, 1H), 6.66 (dd,  $J_1 = 8.2, J_2 = 2.1$  Hz, 1H), 3.70 (s, 3H), 2.78 (s, 1H), 1.14 (dd,  $J_1 = 7.5, J_2 = 5.3$  Hz, 2H), 0.93 (dd,  $J_1 = 7.1$  Hz,  $J_2 = 4.9$  Hz, 2H).

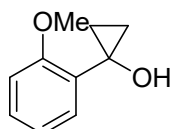

**1-(2-methoxyphenyl)cyclopropan-1-ol (1n):** 657.0 mg, 40% yield; a light yellow solid;  $^1\text{H}$  NMR (400 MHz,  $\text{CDCl}_3$ ):  $\delta$  7.26 (t,  $J = 8.1$  Hz, 1H), 7.20 (d,  $J = 7.8$  Hz, 1H), 6.90 (t,  $J = 7.1$  Hz, 2H), 3.92 (s, 3H), 1.10 (dd,  $J_1 = 7.2, J_2 = 5.8$  Hz, 2H), 0.91 (dd,  $J_1 = 6.4$  Hz,  $J_2 = 5.4$  Hz, 2H).

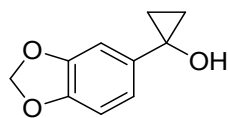

**1-(benzo[d][1,3]dioxol-5-yl)cyclopropan-1-ol (1o):** 803.5 mg, 45% yield; a white solid;  $^1\text{H}$  NMR (400 MHz,  $\text{CDCl}_3$ ):  $\delta$  6.84-6.82 (m, 2H), 6.78 (s, 1H), 5.94 (s, 2H), 2.24 (s, 1H), 1.20 (dd,  $J_1 = 7.4$  Hz,  $J_2 = 5.3$  Hz, 2H), 0.96 (dd,  $J_1 = 7.1, J_2 = 5.0$  Hz, 2H).

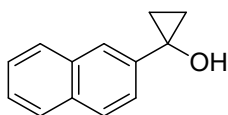

**1-(naphthalen-2-yl)cyclopropan-1-ol (1p):** 773.8 mg, 42% yield; a white solid;  $^1\text{H}$  NMR (400 MHz,  $\text{CDCl}_3$ ):  $\delta$  7.85 (s, 1H), 7.84-7.82 (m, 2H), 7.80 (d,  $J = 3.7$  Hz, 1H), 7.50-7.48 (m, 1H), 7.47-7.44 (m, 1H), 7.31 (dd,  $J_1 = 8.6$  Hz,  $J_2 = 1.8$  Hz, 1H), 2.50 (s, 1H), 1.35 (dd,  $J_1 = 7.6, J_2 = 5.4$  Hz, 2H), 1.17 (dd,  $J_1 = 7.2$  Hz,  $J_2 = 5.1$  Hz, 2H).

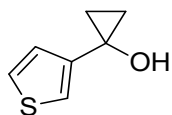

**1-(thiophen-3-yl)cyclopropan-1-ol (1q):** 630.0 mg, 45% yield; a yellow oil;  $^1\text{H}$  NMR (400 MHz,  $\text{CDCl}_3$ ):  $\delta$  7.26 (dd,  $J_1 = 5.0, J_2 = 3.2$  Hz, 1H), 7.17-7.12 (m, 1H), 6.82 (d,  $J = 5.0$  Hz, 1H), 2.55 (s, 1H), 1.21 (dd,  $J_1 = 7.6, J_2 = 5.6$  Hz, 2H), 0.98 (dd,  $J_1 = 7.1$  Hz,  $J_2 = 5.2$  Hz, 2H).

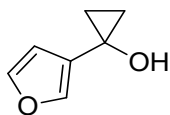

**1-(furan-3-yl)cyclopropan-1-ol (1r):** 260.7 mg, 21% yield; a light yellow oil;  $^1\text{H NMR}$  (400 MHz,  $\text{CDCl}_3$ ):  $\delta$  8.10 (d,  $J = 7.3$ , 1H), 7.82-7.81 (m, 1H), 7.33-7.31 (m, 1H), 2.60 (s, 1H), 1.15 (dd,  $J_1 = 7.3$ ,  $J_2 = 5.2$  Hz, 2H), 0.96 (dd,  $J_1 = 7.0$  Hz,  $J_2 = 5.0$  Hz, 2H).

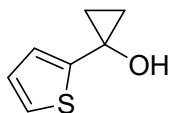

**1-(thiophen-2-yl)cyclopropan-1-ol (1s):** 525.0 mg, 37% yield; a light yellow oil;  $^1\text{H NMR}$  (400 MHz,  $\text{CDCl}_3$ ):  $\delta$  7.16 (d,  $J = 5.0$  Hz, 1H), 6.93 (t,  $J = 3.6$  Hz, 1H), 6.86 (d,  $J = 3.3$  Hz, 1H), 2.81 (s, 1H), 1.28 (dd,  $J_1 = 7.4$ ,  $J_2 = 5.5$  Hz, 2H), 1.05 (dd,  $J_1 = 7.0$  Hz,  $J_2 = 5.1$  Hz, 2H).

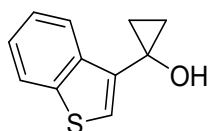

**1-(benzo[b]thiophen-3-yl)cyclopropan-1-ol (1t):** 994.6mg, 52% yield; a yellow oil;  $^1\text{H NMR}$  (400 MHz,  $\text{CDCl}_3$ ):  $\delta$  8.14 (d,  $J = 7.7$  Hz, 1H), 7.84 (d,  $J = 7.8$  Hz, 1H), 7.41 (t,  $J = 6.6$  Hz, 1H), 7.38-7.34 (m, 1H), 7.29 (s, 1H), 2.45 (s, 1H), 1.21 (dd,  $J_1 = 7.4$  Hz,  $J_2 = 5.3$  Hz, 2H), 1.00 (dd,  $J_1 = 6.8$ ,  $J_2 = 4.9$  Hz, 2H).

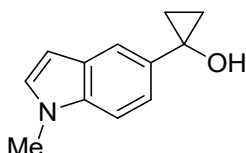

**1-(1-methyl-1H-indol-5-yl)cyclopropan-1-ol (1u):** 356 mg, 19 %; a light yellow solid;  $R_f$  (PE : EA = 10 : 1) = 0.35; m.p. = 43-44°C;  $^1\text{H NMR}$  (400 MHz,  $\text{CDCl}_3$ ):  $\delta$  7.64 (d,  $J = 0.8$  Hz, 1H), 7.29-7.23 (m, 2H), 7.04 (d,  $J = 3.0$  Hz, 1H), 6.45 (dd,  $J_1 = 3.0$  Hz,  $J_2 = 0.3$  Hz, 1H), 3.77 (s, 3H), 1.21 (dd,  $J_1 = 7.3$  Hz,  $J_2 = 5.0$  Hz, 2H), 1.04 (dd,  $J_1 = 7.0$  Hz,  $J_2 = 4.7$  Hz, 2H);  $^{13}\text{C NMR}$  (100 MHz,  $\text{CDCl}_3$ ):  $\delta$  135.9, 134.9, 129.4, 128.4, 120.1, 117.9, 109.3, 101.0, 57.6, 32.9, 16.5; IR (KBr,  $\nu$   $\text{cm}^{-1}$ ): 3671, 3365, 3085, 2932, 2877, 2820, 1569, 1492, 1447, 1423, 1338, 1241, 887, 863, 805, 723; HRMS (ESI)  $m/z$  calcd for  $\text{C}_{12}\text{H}_{13}\text{NONa}^+$  ( $\text{M}+\text{Na}$ ) $^+$  210.0889, found 210.0889.

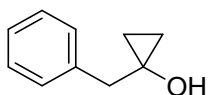

**1-benzylcyclopropan-1-ol (1v):** 965.8 mg, 65% yield; a colorless oil;  $^1\text{H NMR}$  (400 MHz,  $\text{CDCl}_3$ ):  $\delta$  7.36-7.25 (m, 5H), 2.89 (s, 2H), 1.94 (s, 1H), 0.82 (dd,  $J_1 = 6.7$ ,  $J_2 = 5.7$  Hz, 2H), 0.65 (dd,  $J_1 = 6.7$  Hz,  $J_2 = 5.0$  Hz, 2H).

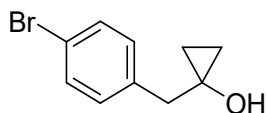

**1-(4-methoxybenzyl)cyclopropan-1-ol (1w):** 1.55 g, 87% yield; a yellow oil;  $^1\text{H NMR}$  (400 MHz,  $\text{CDCl}_3$ ):  $\delta$  7.21 (d,  $J = 8.3$  Hz, 2H), 6.87 (d,  $J = 8.3$  Hz, 2H), 3.80 (s, 3H), 2.82 (s, 2H), 2.11 (s, 1H), 0.81-0.79 (m, 2H), 0.63-0.60 (m, 2H).

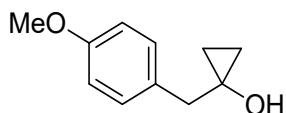

**1-(4-bromobenzyl)cyclopropan-1-ol (1x):** 2.24 g, 98% yield; a white solid;  $^1\text{H NMR}$  (400 MHz,  $\text{CDCl}_3$ ):  $\delta$  7.51 (d,  $J = 8.3$  Hz, 2H), 7.18 (d,  $J = 8.3$  Hz, 2H), 2.83 (s, 2H), 1.77 (s, 1H), 0.82 (dd,  $J_1 = 6.7$ ,  $J_2 = 5.6$  Hz, 2H), 0.63 (dd,  $J_1 = 6.7$  Hz,  $J_2 = 5.1$  Hz, 2H).

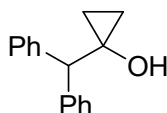

**1-benzhydrylcyclopropan-1-ol (1y):** 964.5 mg, 43% yield; a light yellow solid;  $^1\text{H NMR}$  (400 MHz,  $\text{CDCl}_3$ ):  $\delta$  7.38-7.36 (m, 4H), 7.34-7.30 (m, 4H), 7.25-7.23 (m, 2H), 3.89 (s, 1H), 0.94 (dd,  $J_1 = 6.9$ ,  $J_2 = 5.4$  Hz, 2H), 0.69 (dd,  $J_1 = 6.8$  Hz,  $J_2 = 5.2$  Hz, 2H).

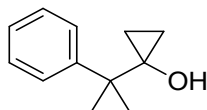

**1-(2-phenylpropan-2-yl)cyclopropan-1-ol (1z):** 761.0 mg, 43% yield; a colorless oil;  $^1\text{H NMR}$  (400 MHz,  $\text{CDCl}_3$ ):  $\delta$  7.51 (dd,  $J_1 = 8.6$  Hz,  $J_2 = 1.3$  Hz, 2H), 7.33 (t,  $J = 7.4$  Hz, 2H), 7.21 (t,  $J = 6.6$  Hz, 1H), 1.67 (s, 1H), 1.28 (s, 6H), 0.84 (dd,  $J_1 = 7.2$ ,  $J_2 = 5.2$  Hz, 2H), 0.71 (dd,  $J_1 = 7.0$  Hz,  $J_2 = 5.0$  Hz, 2H).

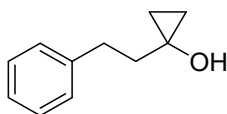

**1-phenethylcyclopropan-1-ol (1aa):** 1.47 g, 91% yield; a colorless oil;  $^1\text{H NMR}$  (400 MHz,  $\text{CDCl}_3$ ):  $\delta$  7.31-7.27 (m, 2H), 7.23-7.18 (m, 3H), 2.88-2.84 (m, 2H), 1.90-1.86 (m, 2H), 1.78 (s, 1H), 0.77 (dd,  $J_1 = 6.5$ ,  $J_2 = 5.4$  Hz, 2H), 0.47 (dd,  $J_1 = 6.5$  Hz,  $J_2 = 5.0$  Hz, 2H).

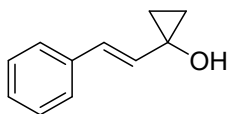

**(E)-1-styrylcyclopropan-1-ol (1ab):** 170.0 mg, 11% yield; a yellow oil;  $^1\text{H NMR}$  (400 MHz,  $\text{CDCl}_3$ ):  $\delta$  7.36-7.29 (m, 4H), 7.21 (t,  $J = 7.2$  Hz, 1H), 6.66 (d,  $J = 15.8$  Hz, 1H), 5.98 (d,  $J = 15.8$

Hz, 1H), 2.24 (s, 1H), 1.17 (dd,  $J_1 = 7.4$ ,  $J_2 = 5.3$  Hz, 2H), 0.87 (dd,  $J_1 = 7.1$  Hz,  $J_2 = 4.9$  Hz, 2H).

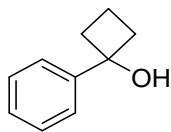

**1-phenylcyclobutan-1-ol (1ac)** 960.8 mg, 65% yield; a pale yellow oil;  $^1\text{H}$  NMR (400 MHz,  $\text{CDCl}_3$ ):  $\delta$  7.46-7.44 (m, 2H), 7.33 (t,  $J = 7.4$  Hz, 2H), 7.26-7.22 (m, 1H), 2.62 (s, 1H), 2.54-2.47 (m, 2H), 2.35-2.78 (m, 2H), 2.02-1.91 (m, 2H), 1.70-1.59 (m, 1H).

### 3) References

1. X. P. He, Y. J. Shu, J. J. Dai, W. M. Zhang and H. J. Xu, Copper-Catalysed Ring-Opening Trifluoromethylation of Cyclopropanols. *Org. Biomol. Chem.* 2015, **13**, 7159.
2. W. Huang and F. Meng, Cobalt-Catalyzed Diastereo- and Enantioselective Hydroalkylation of Cyclopropenes with Cobalt-Homoenolates. *Angew. Chem. Int. Ed.* 2021, **60**, 2694.
3. B. Q. Cheng, S. X. Zhang, Y. Y. Cui and Z. L. Shen, Copper(II)-Mediated Ring Opening/Alkynylation of Tertiary Cyclopropanols by Using Nonmodified Terminal Alkynes. *Org. Lett.* 2020, **22**, 5456.
4. L. Cardinale, M. Neumeier, M. Majek and A. Wangelina, Aryl Pyrazoles from Photocatalytic Cycloadditions of Arenediazonium. *Org. Lett.* 2020, **22**, 7219.
5. Xu, B.; Wang, D.; Hu, Y.; Shen, Q. Silver-Catalyzed Ring-Opening Difluoromethylthiolation/Trifluoromethylthiolation of Cycloalkanols with  $\text{PhSO}_2\text{SCF}_2\text{H}$  or  $\text{PhSO}_2\text{SCF}_3$ . *Org. Chem. Front.*, **2018**, *5*, 1462-1465.



#### 4) Spectra for 1

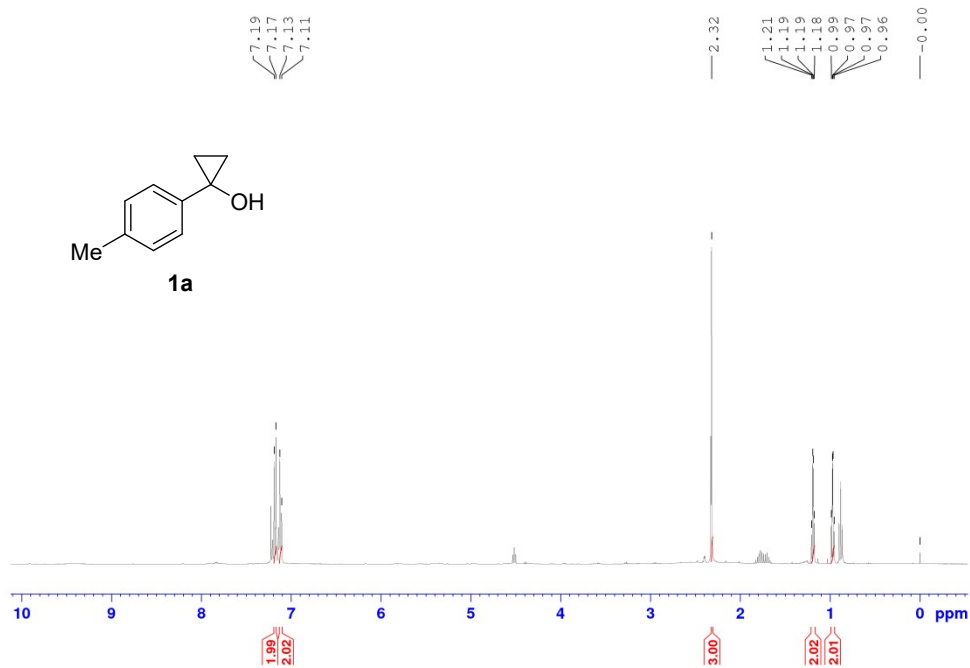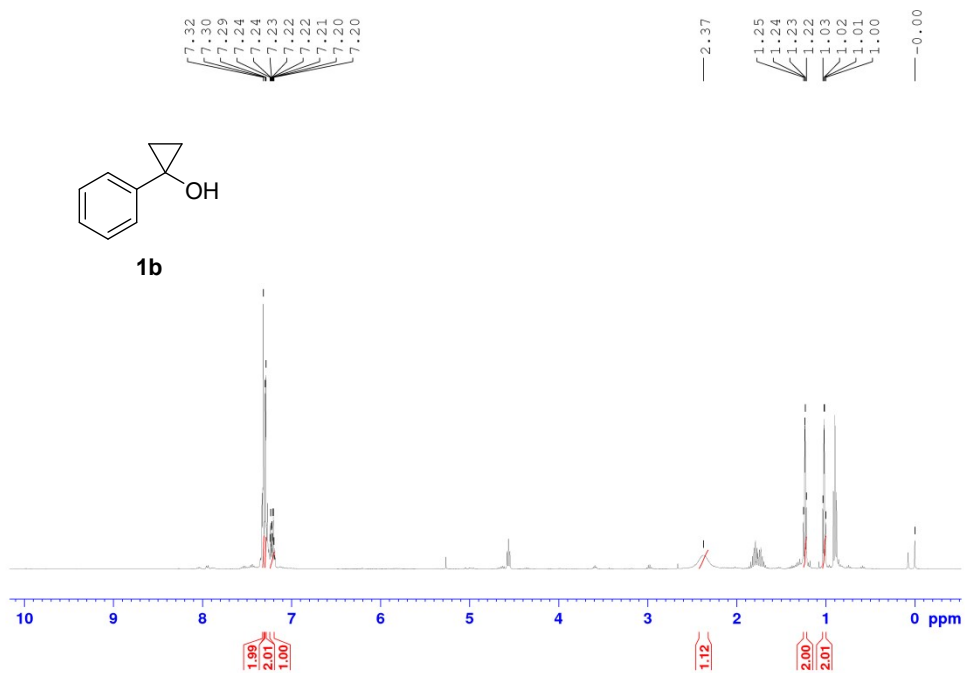

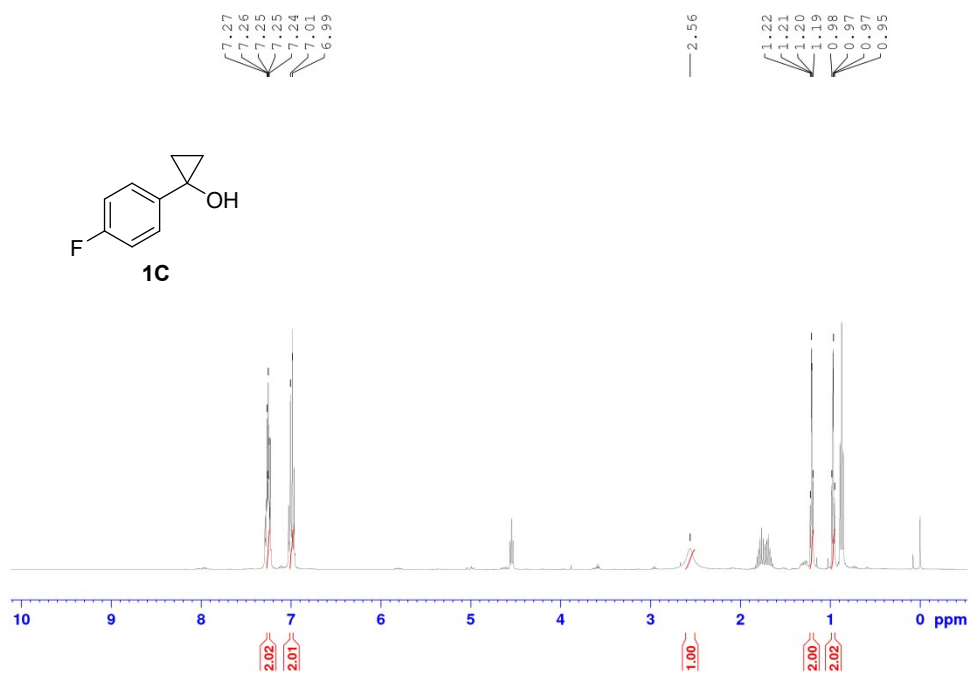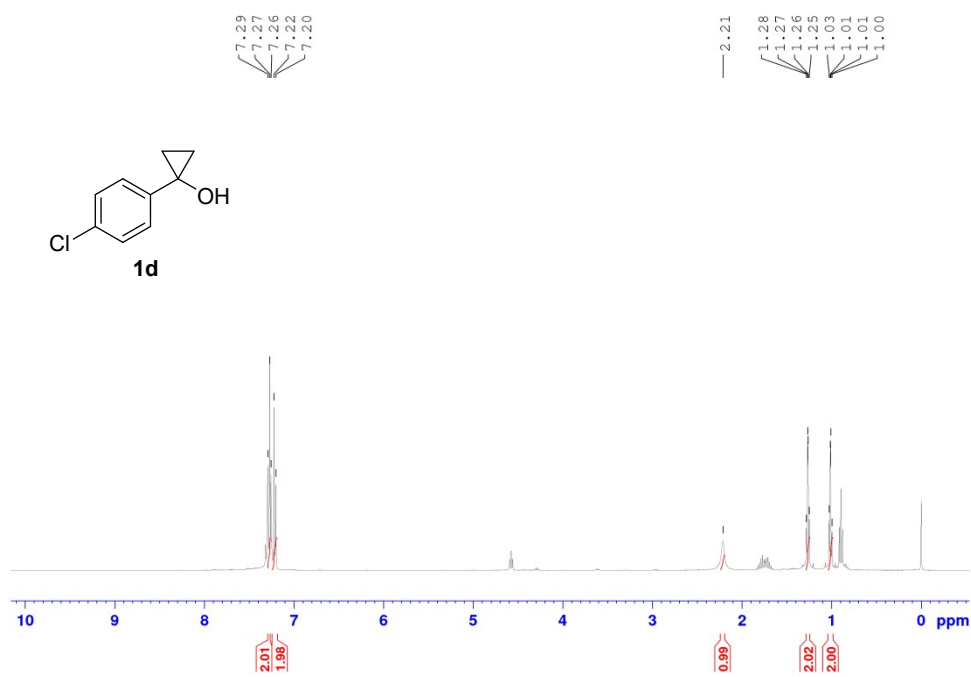

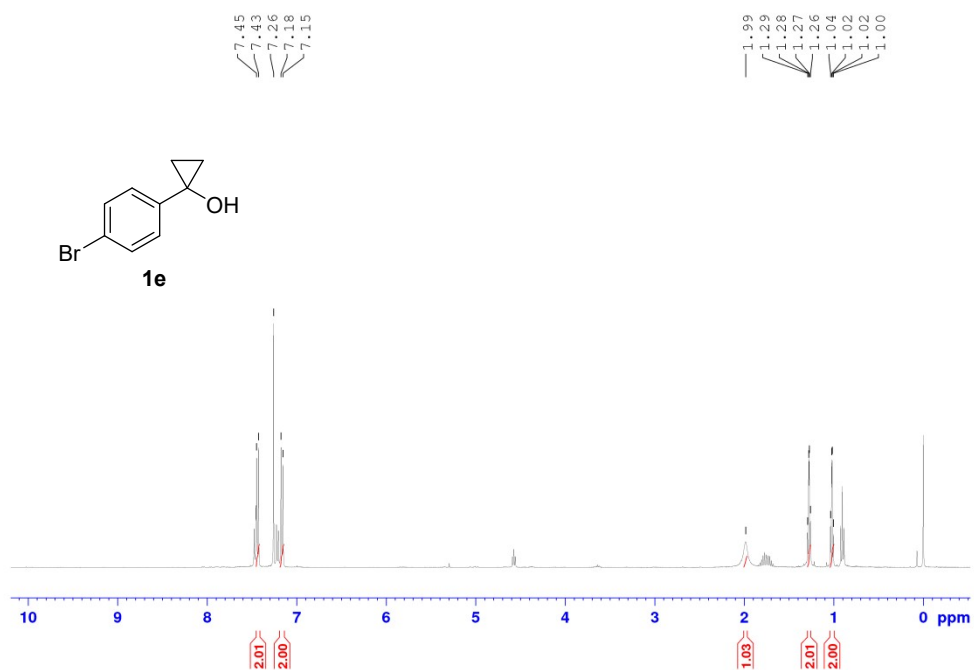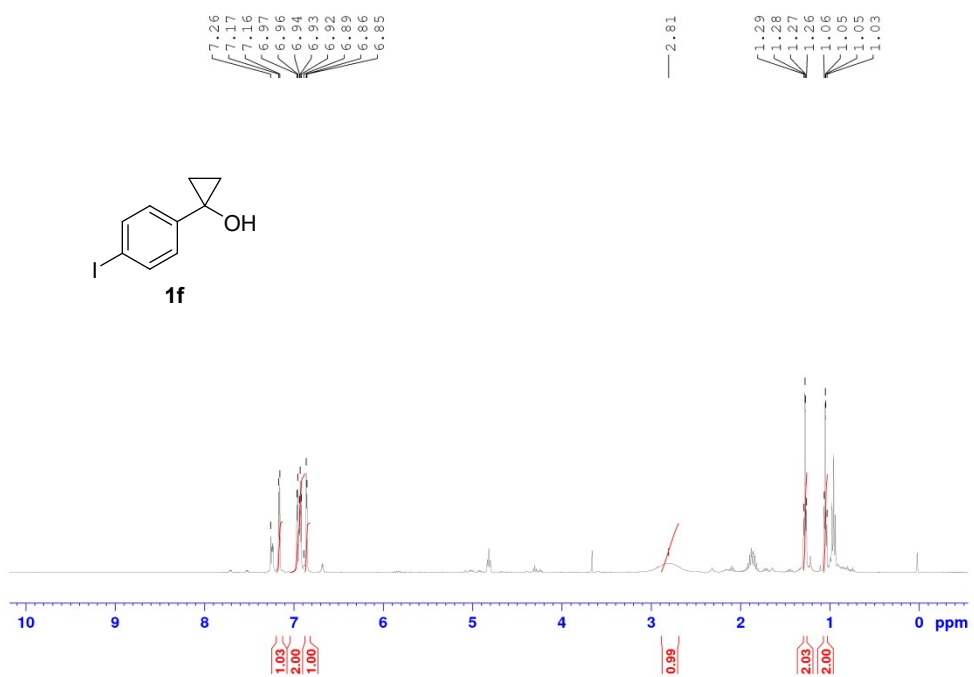

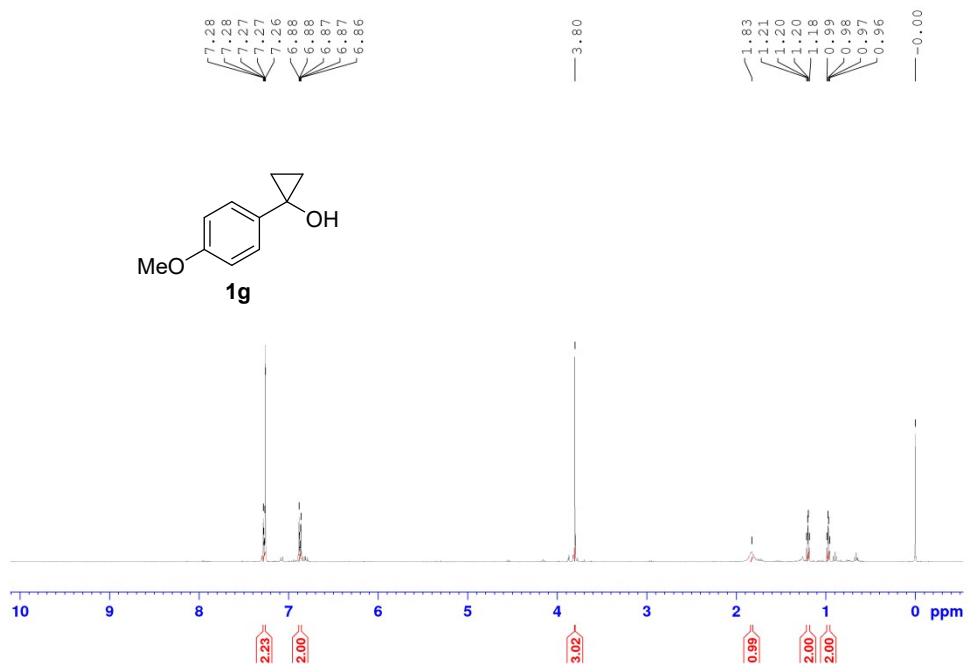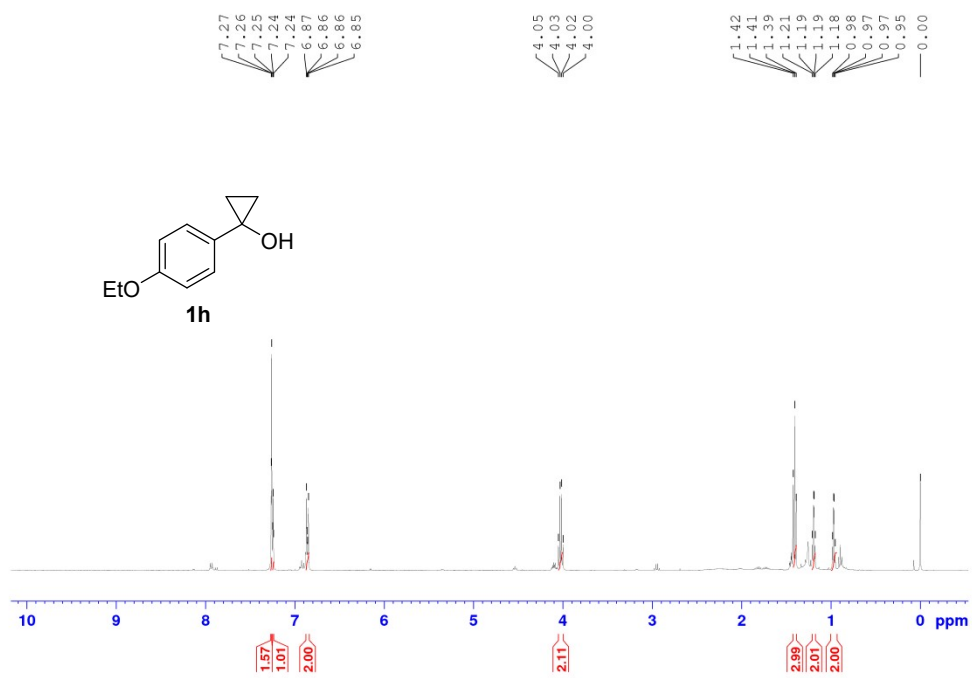

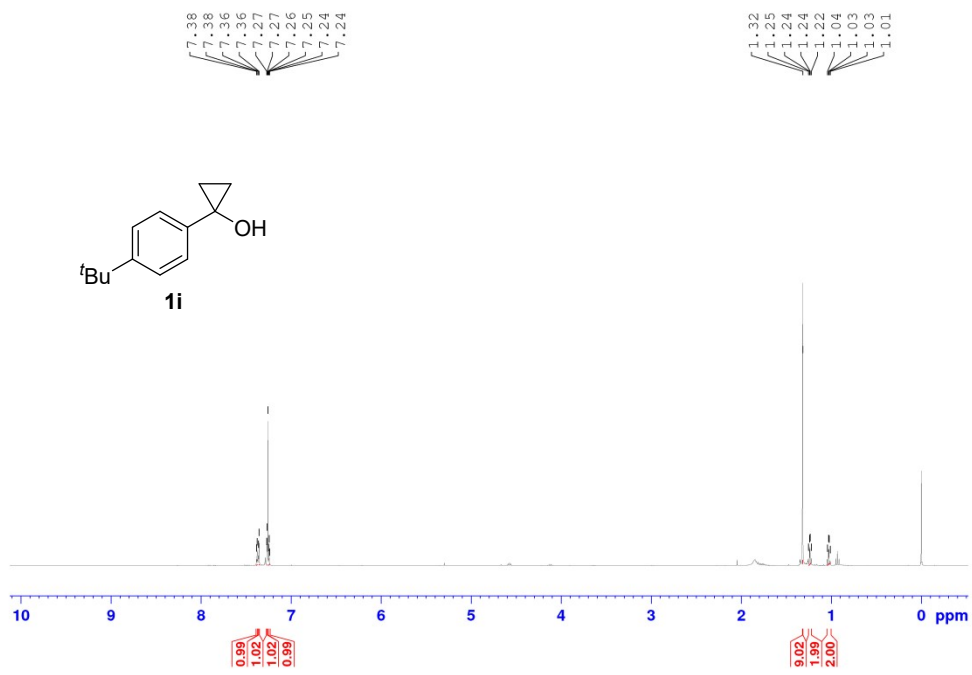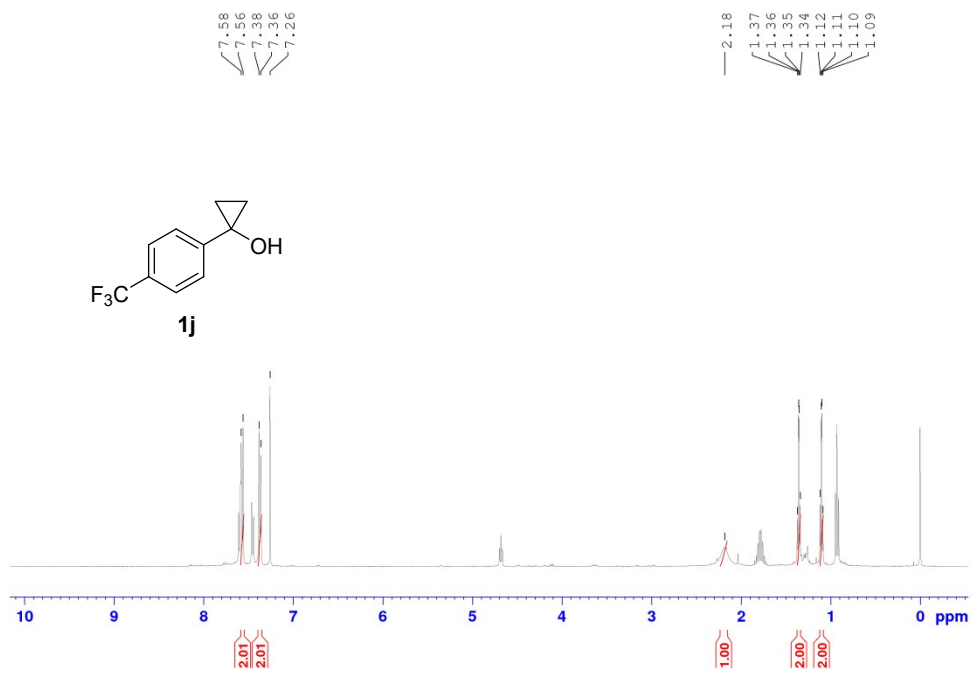

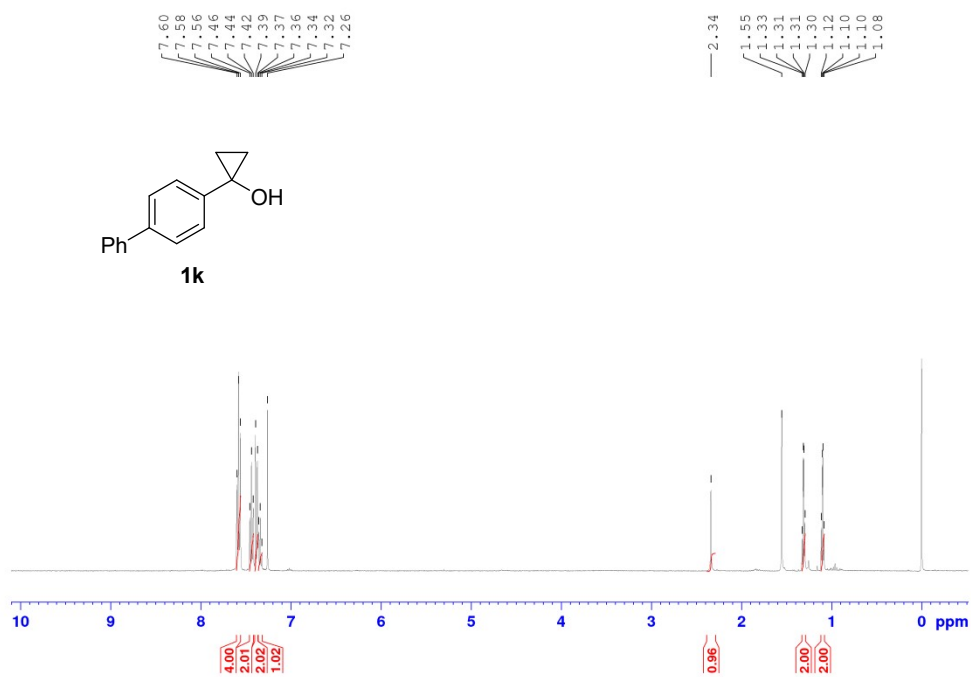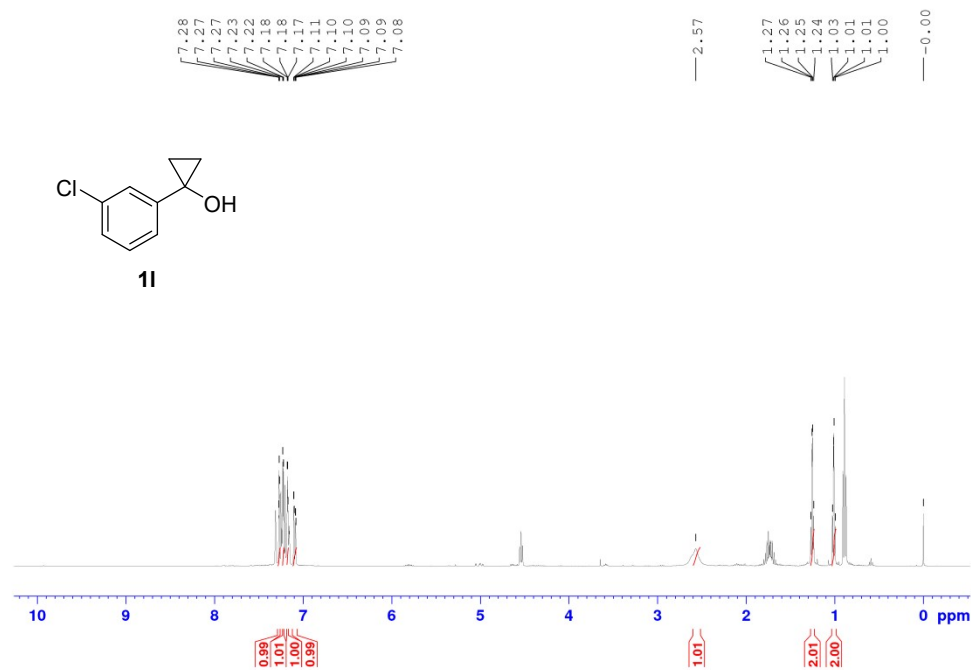

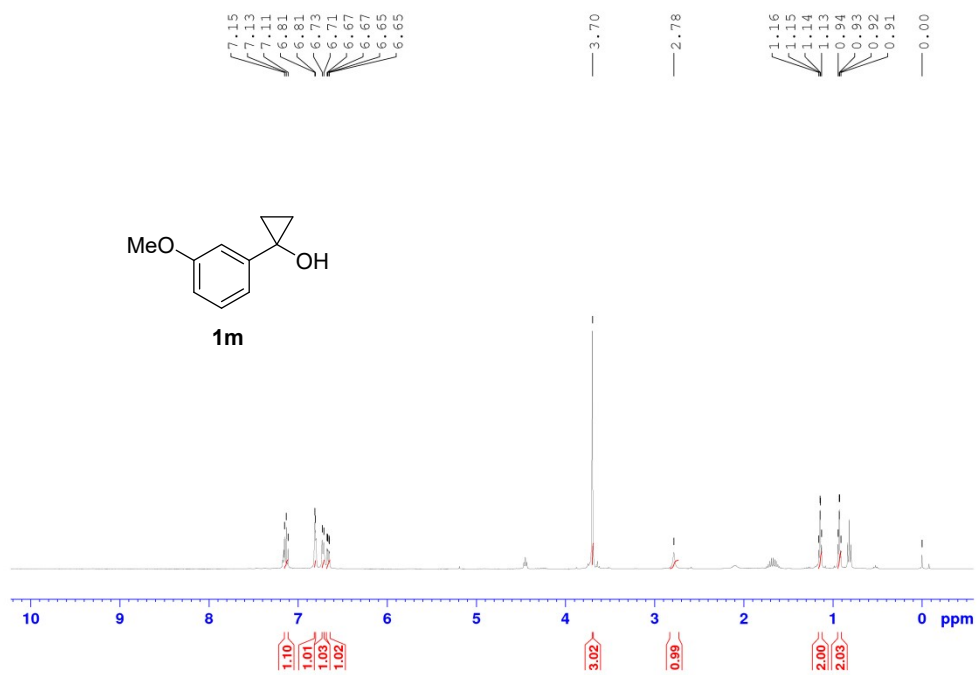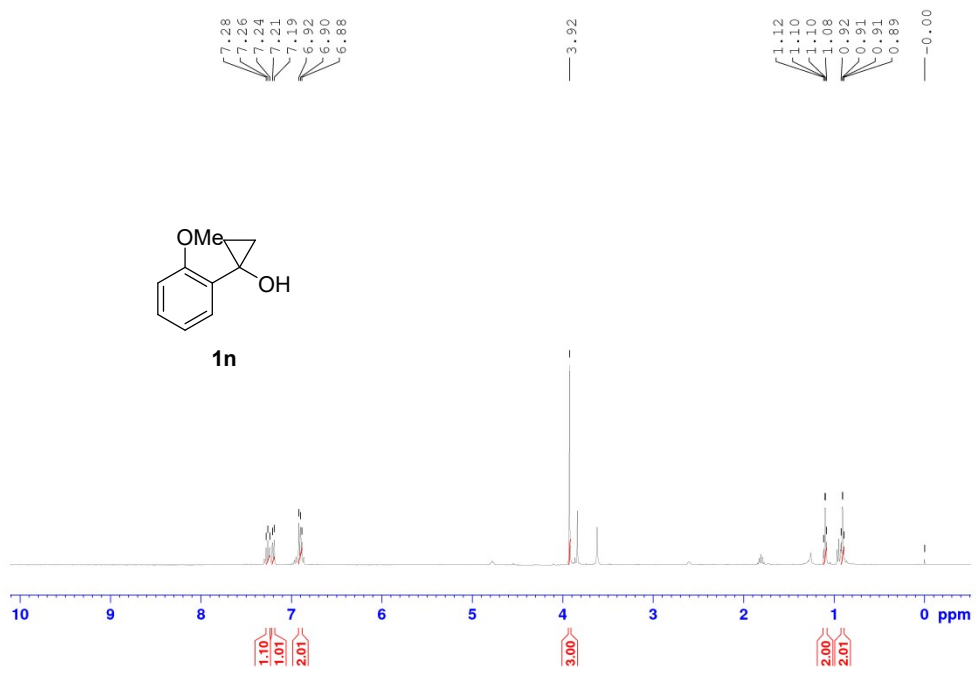

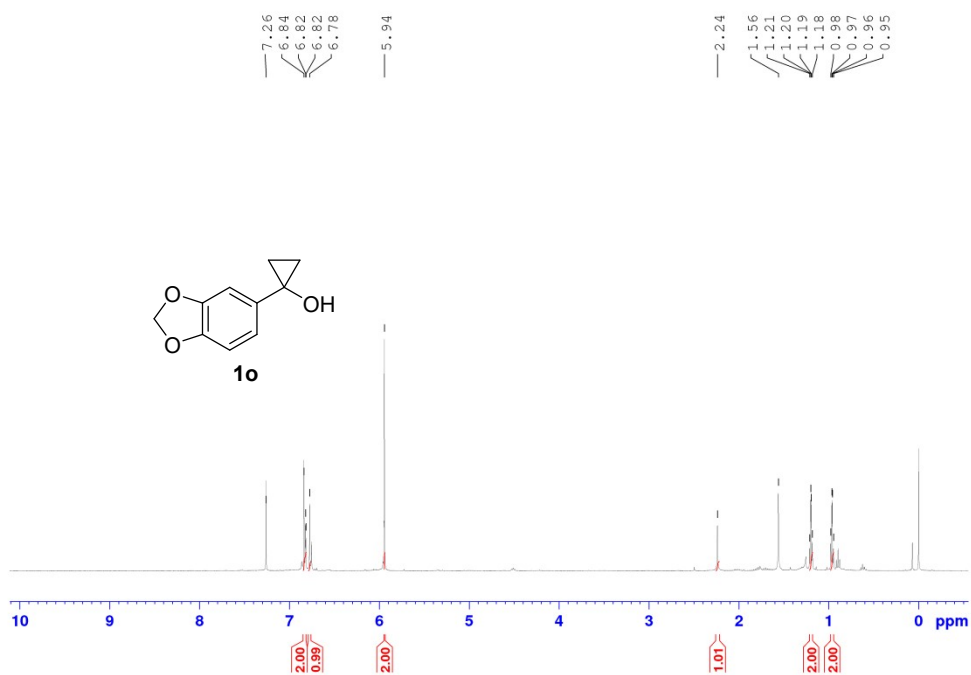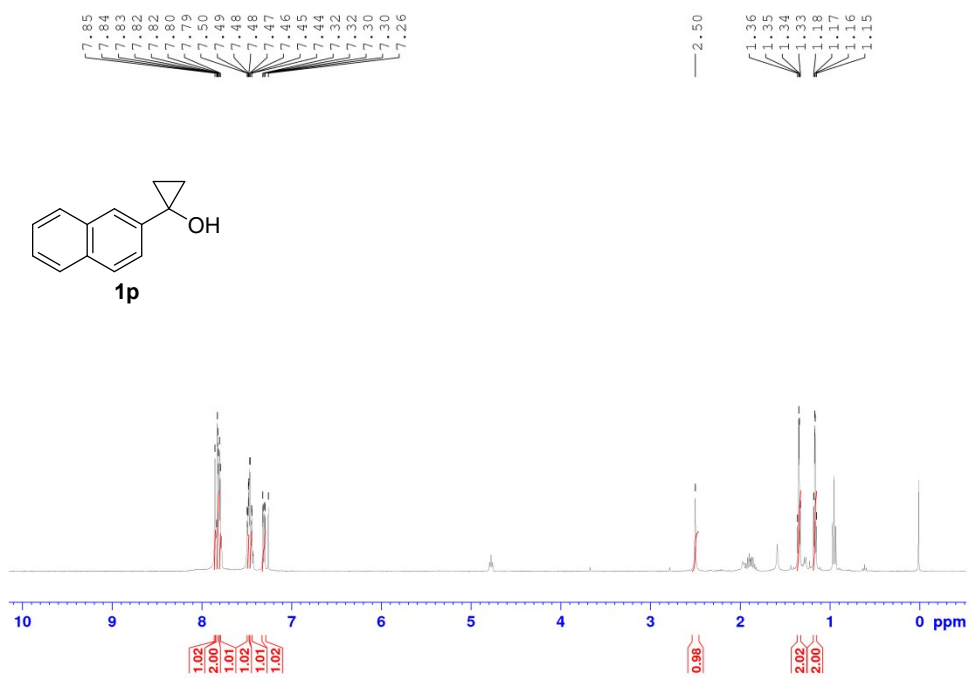



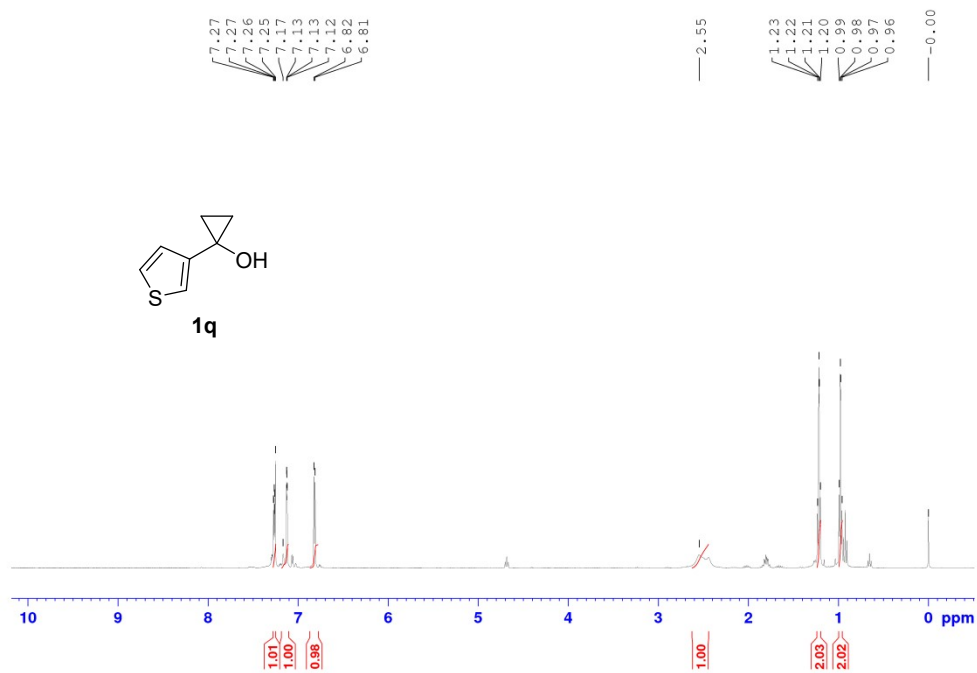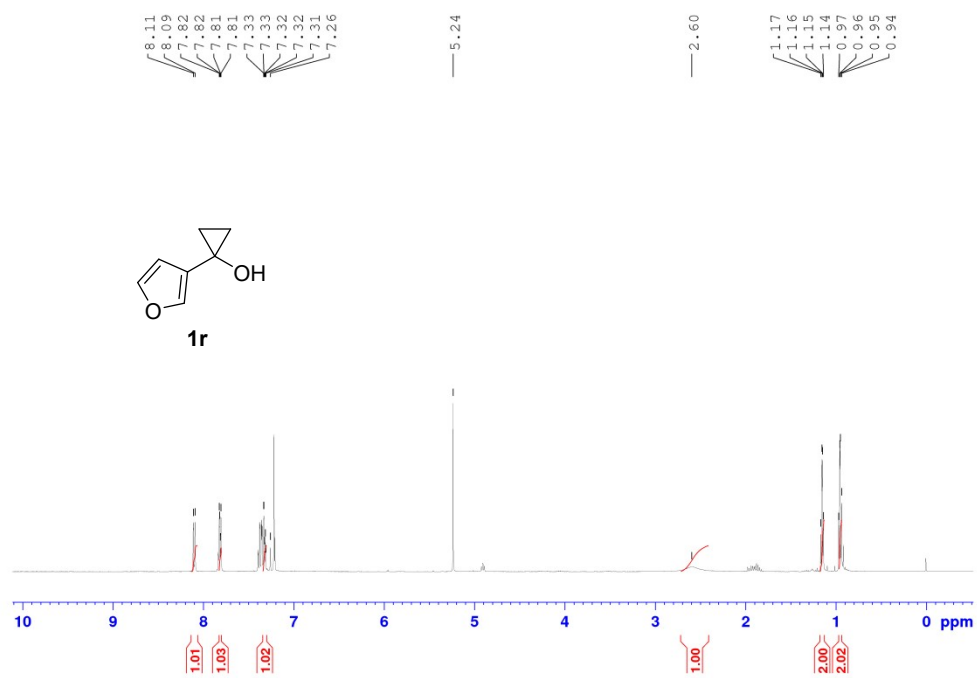

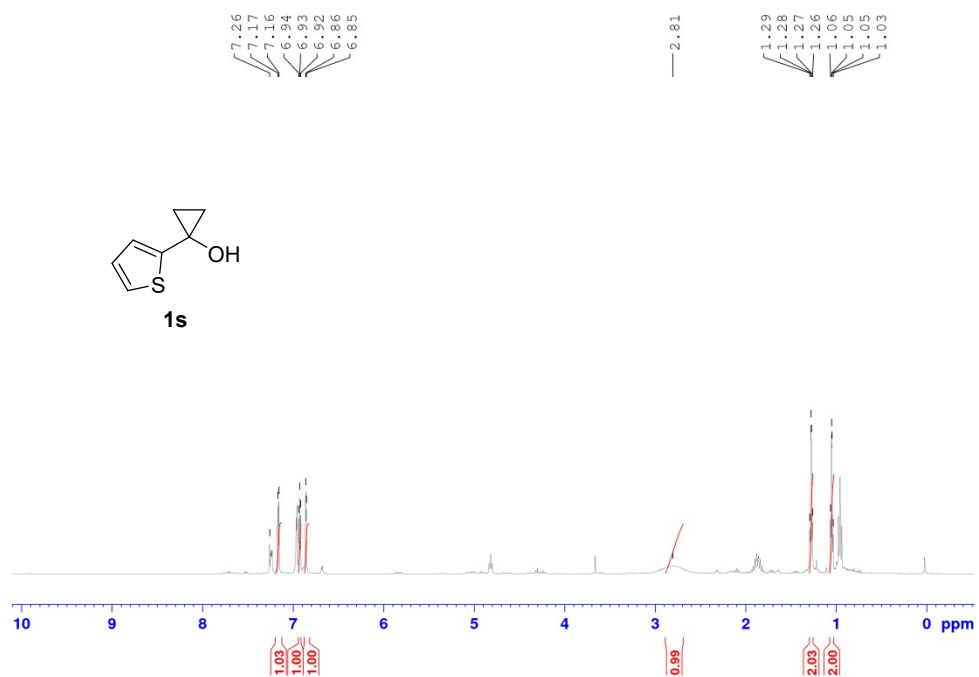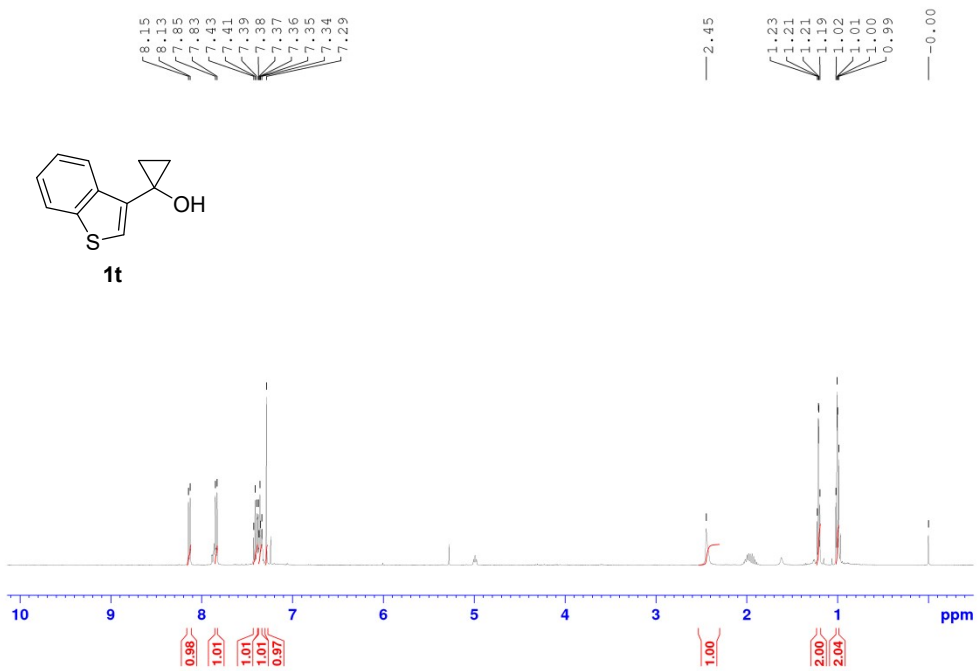

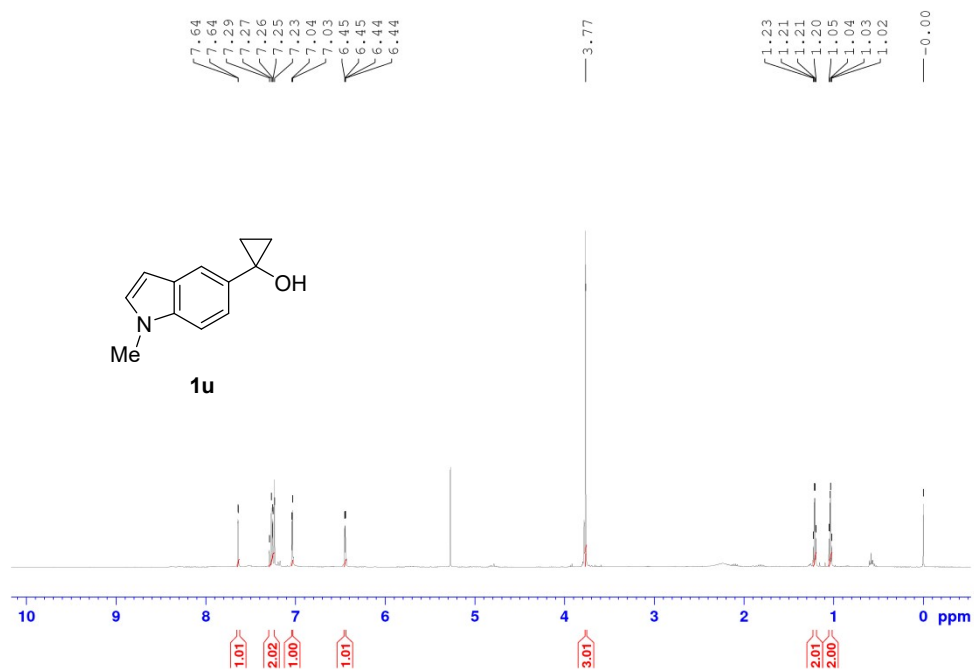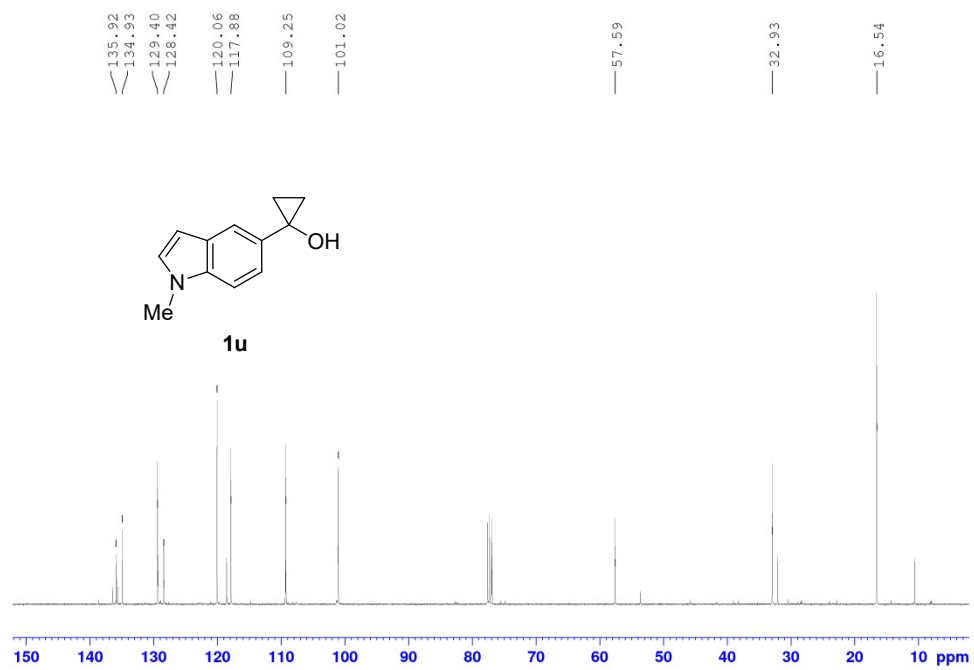

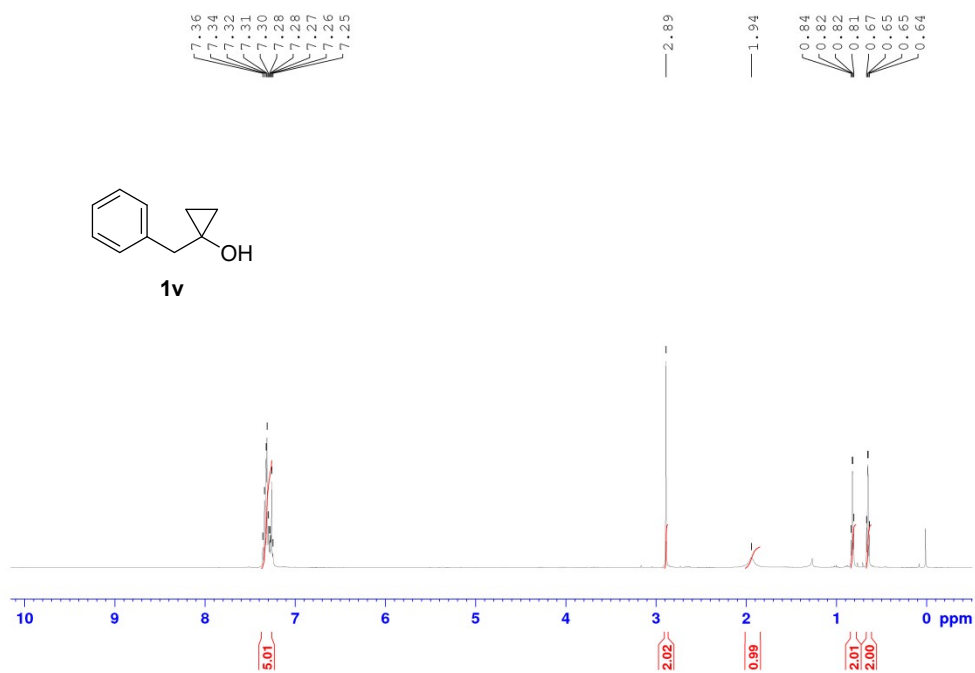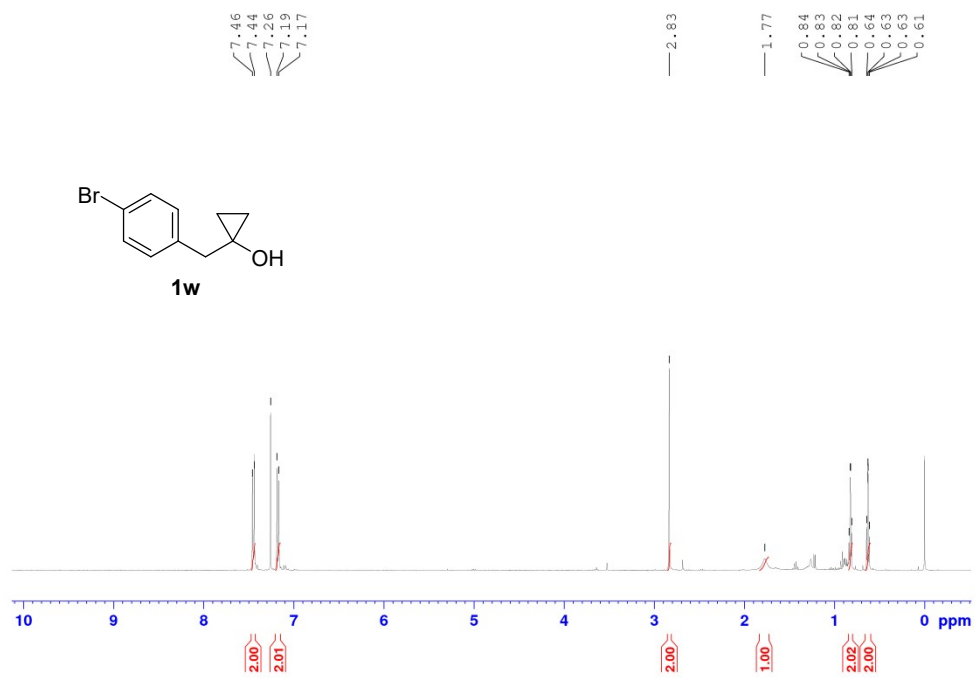

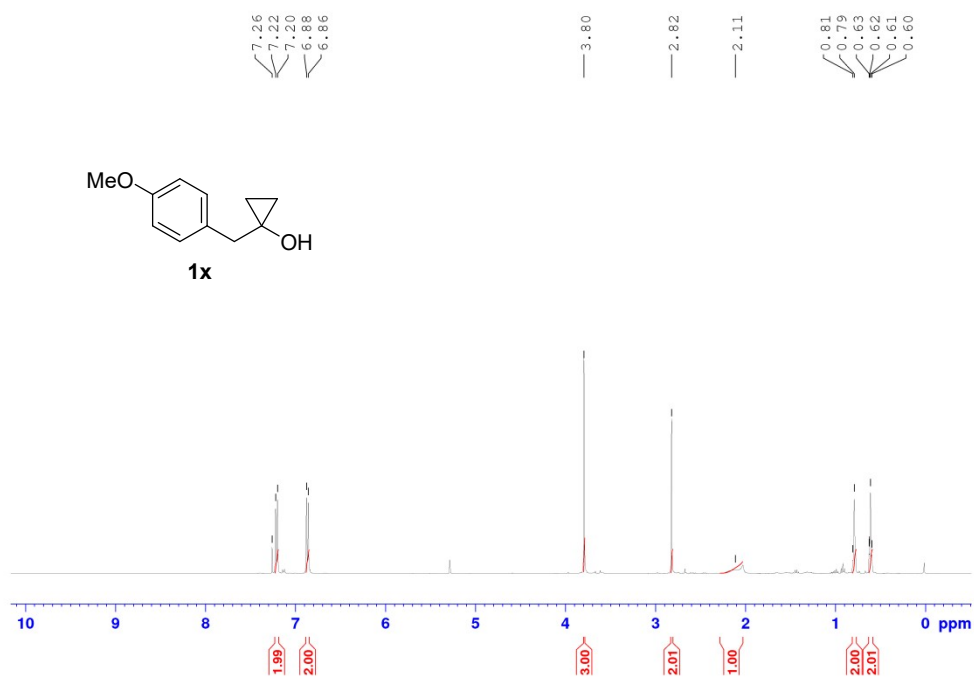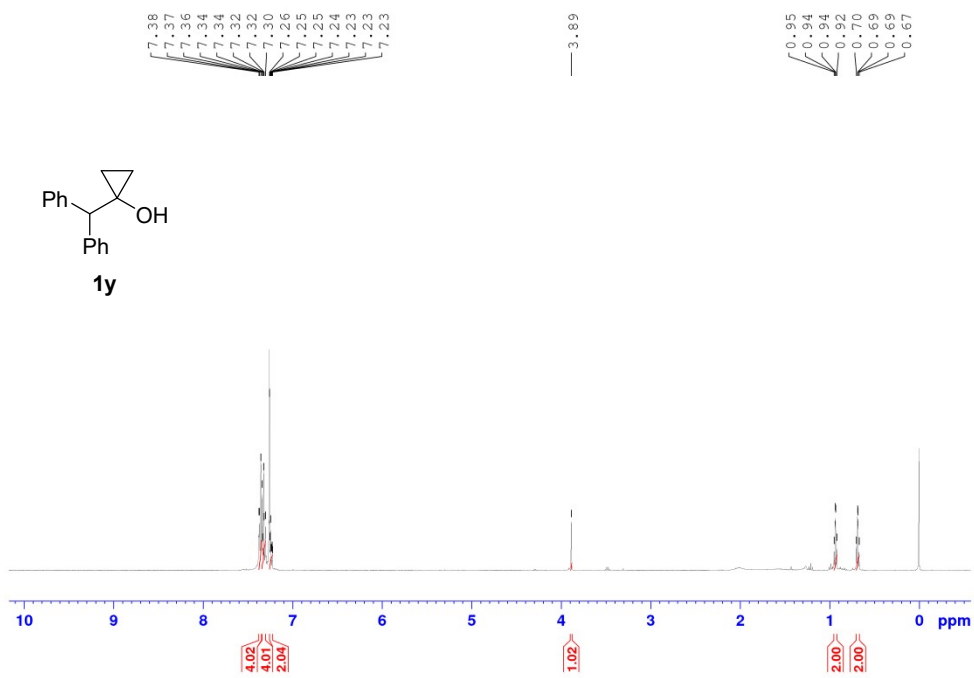

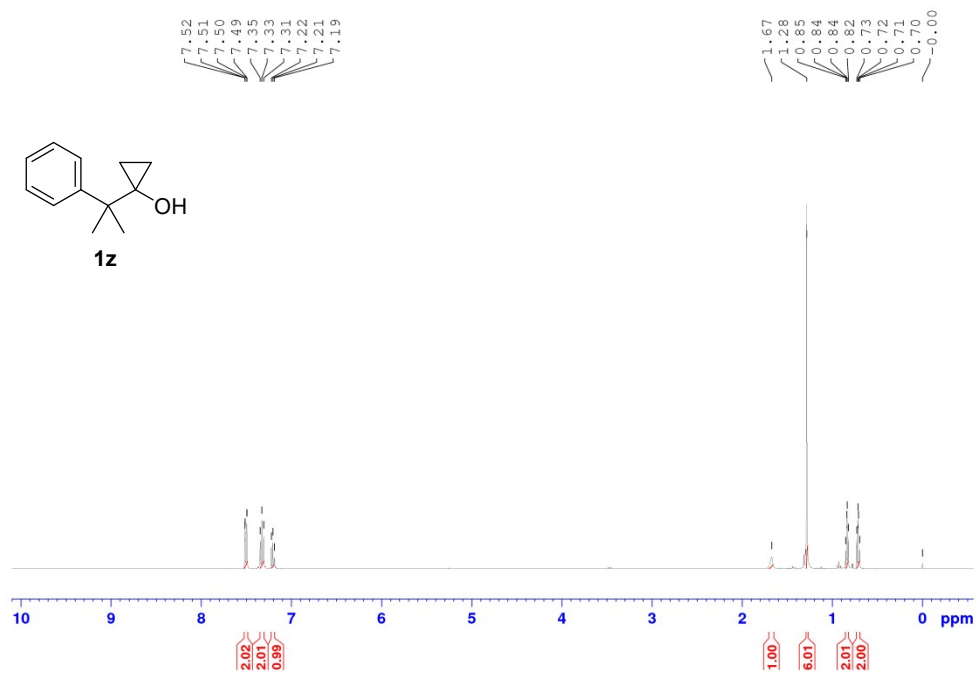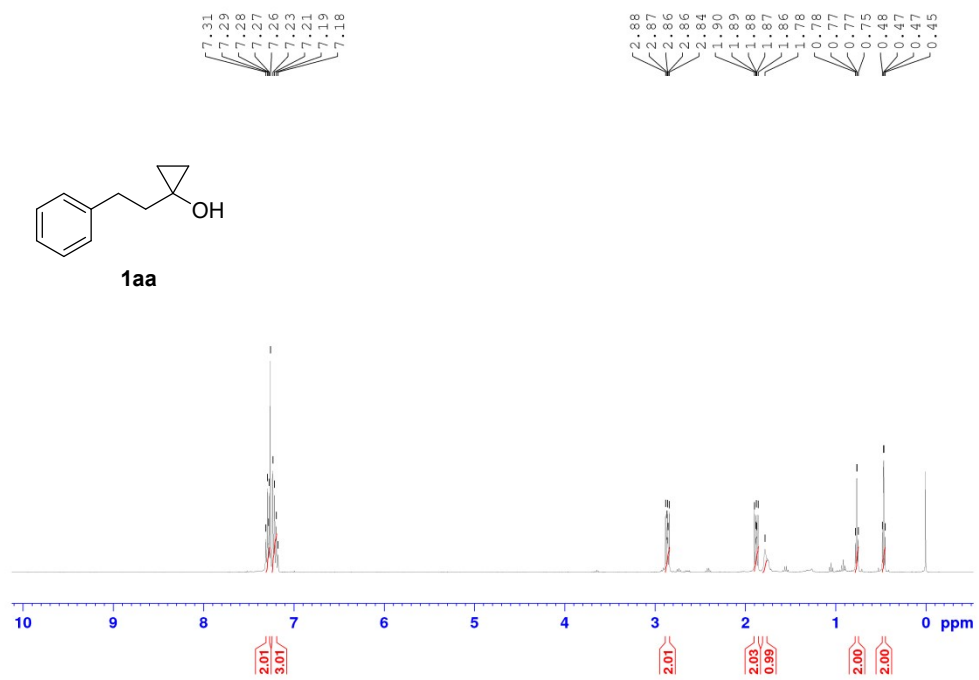

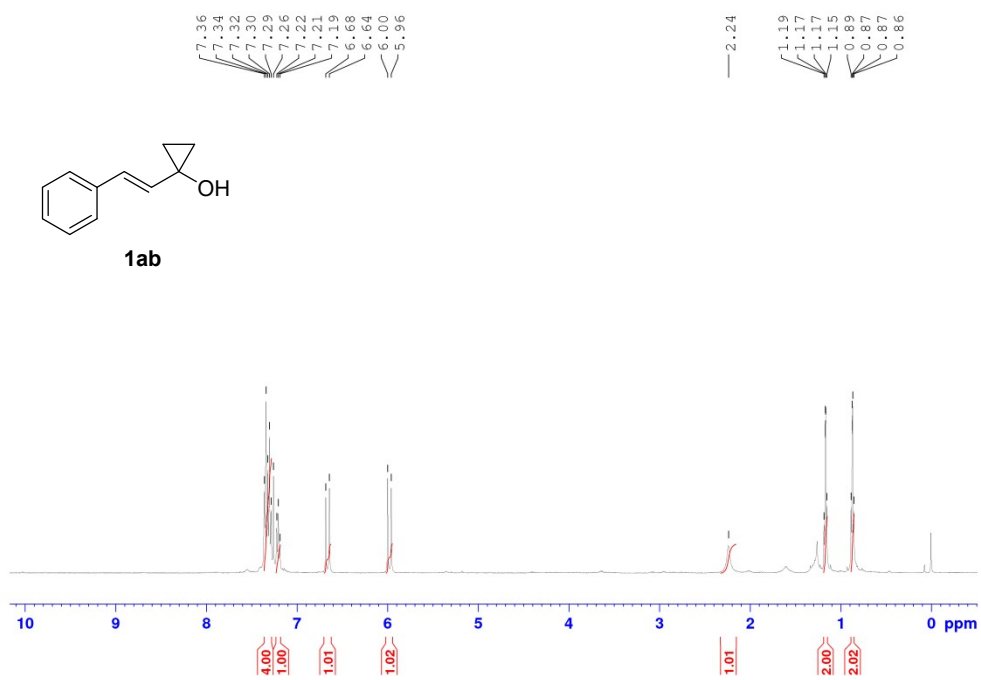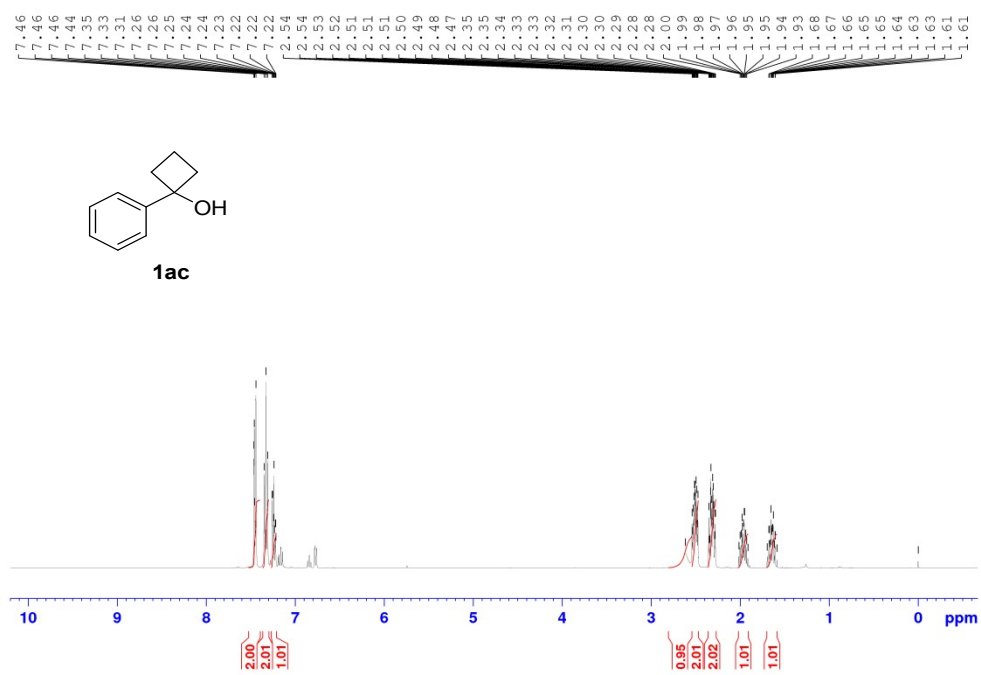

### 5) Spectra for 3 and 4

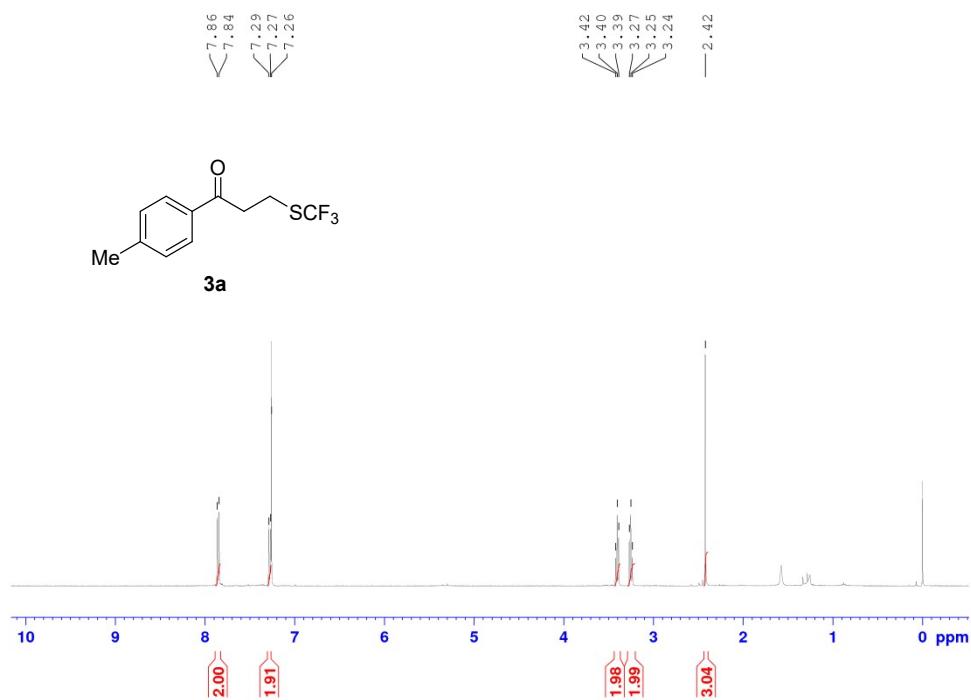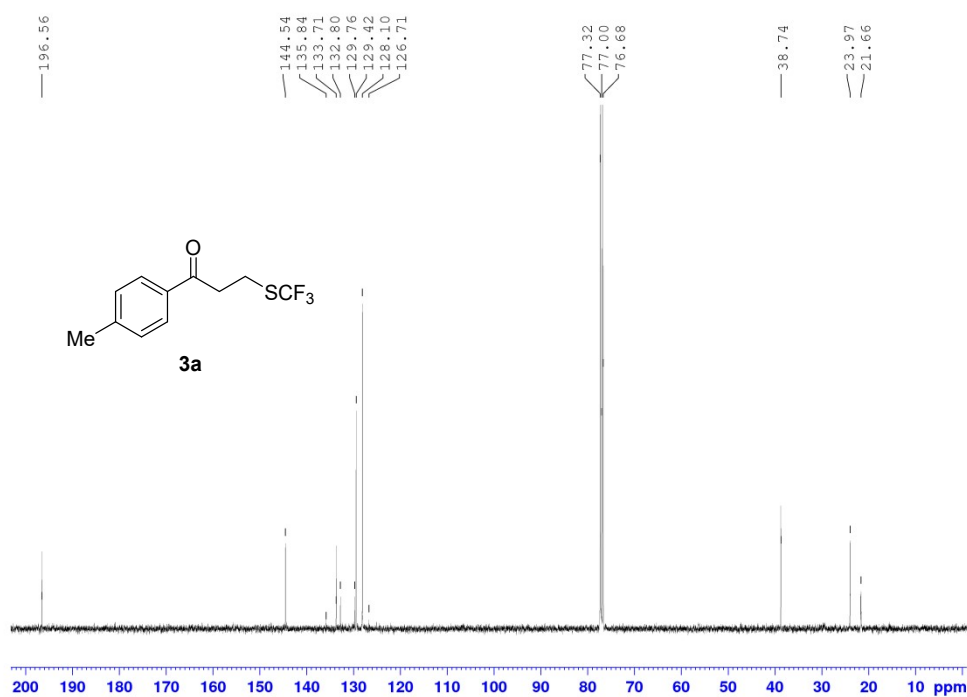



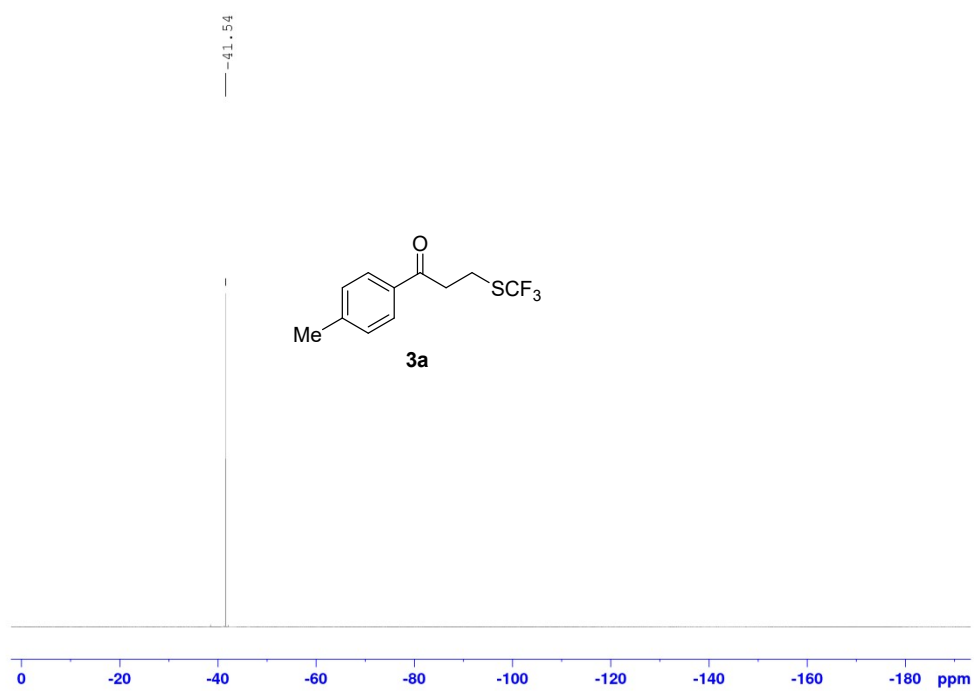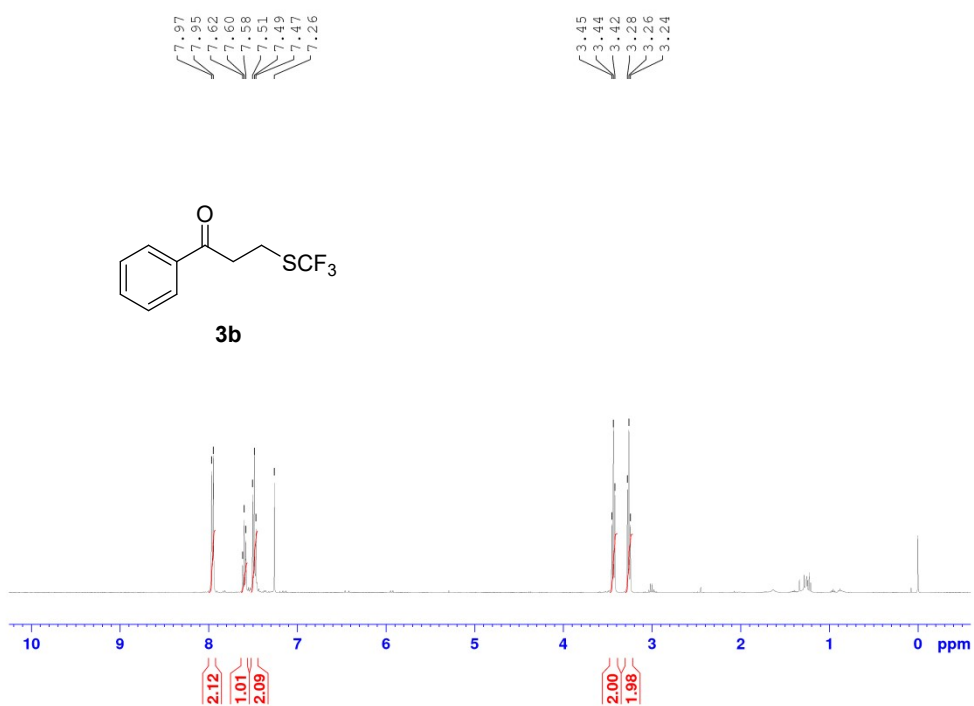

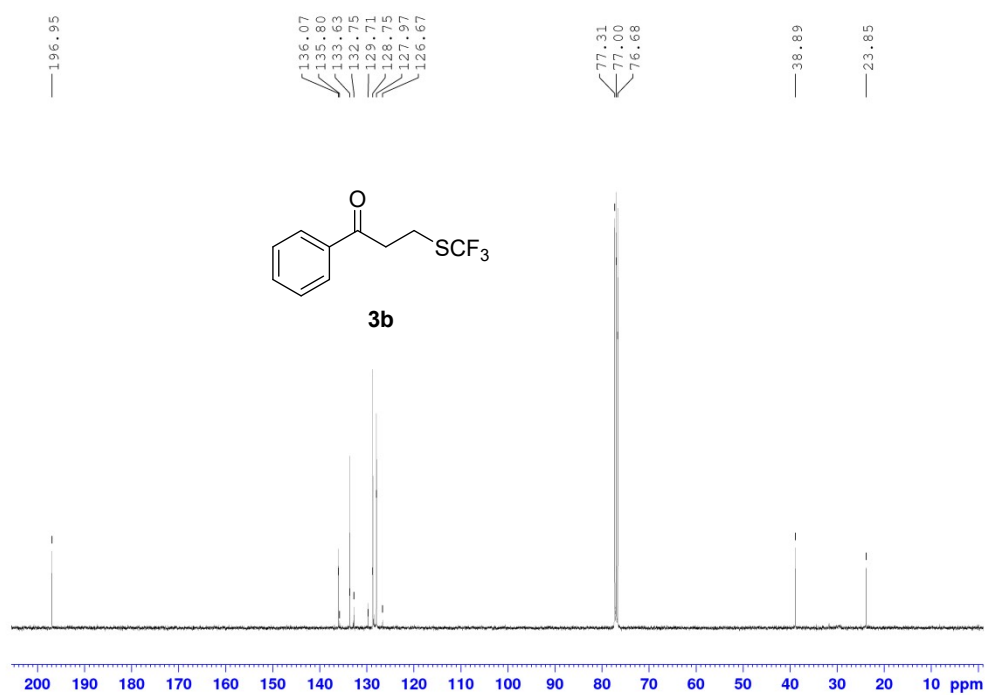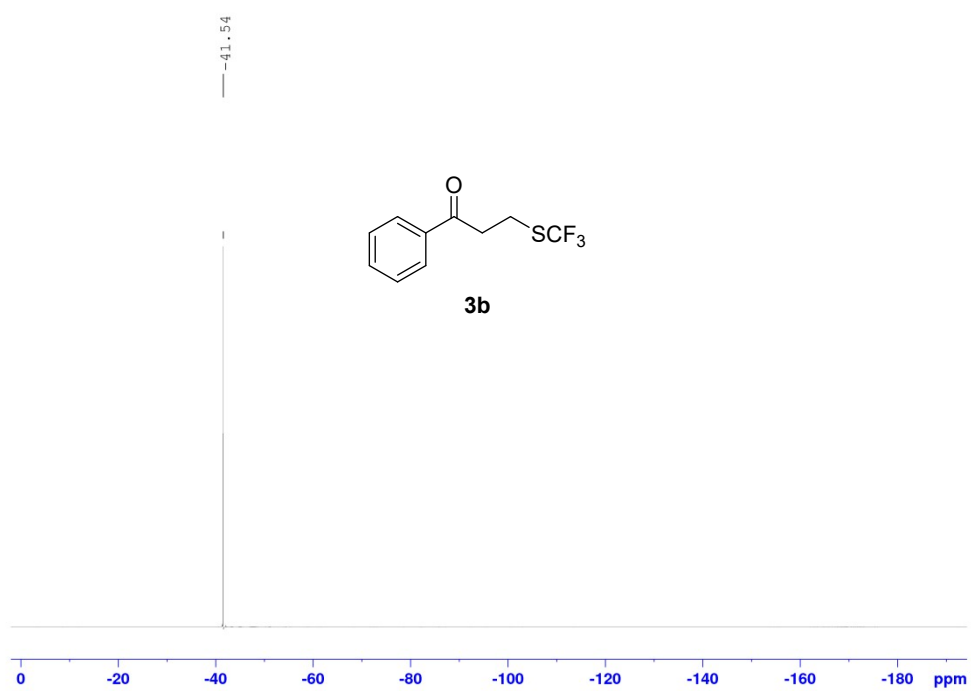

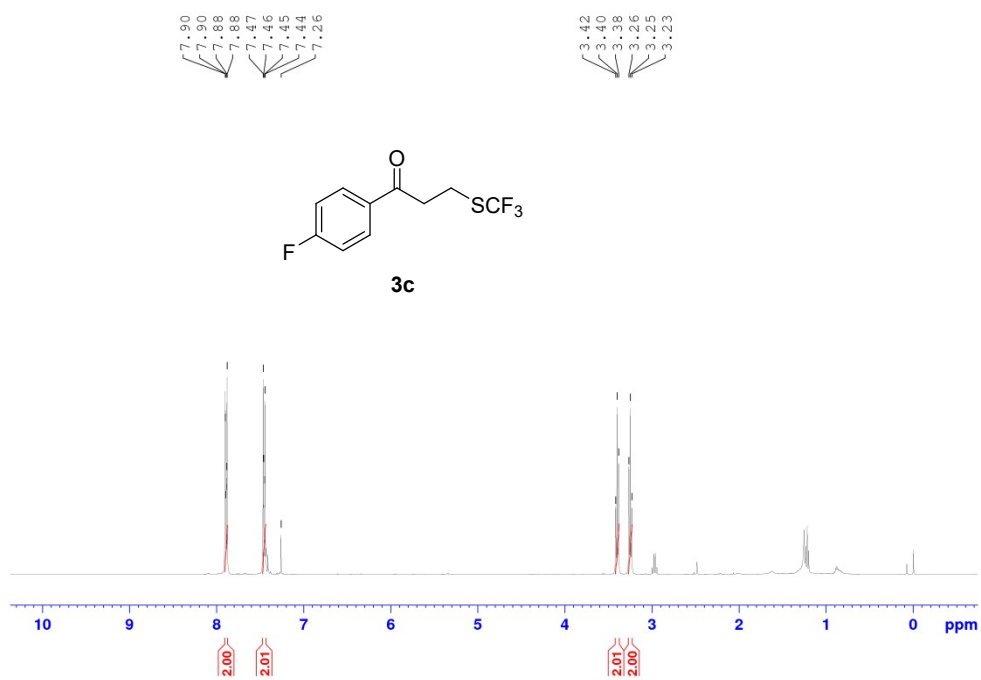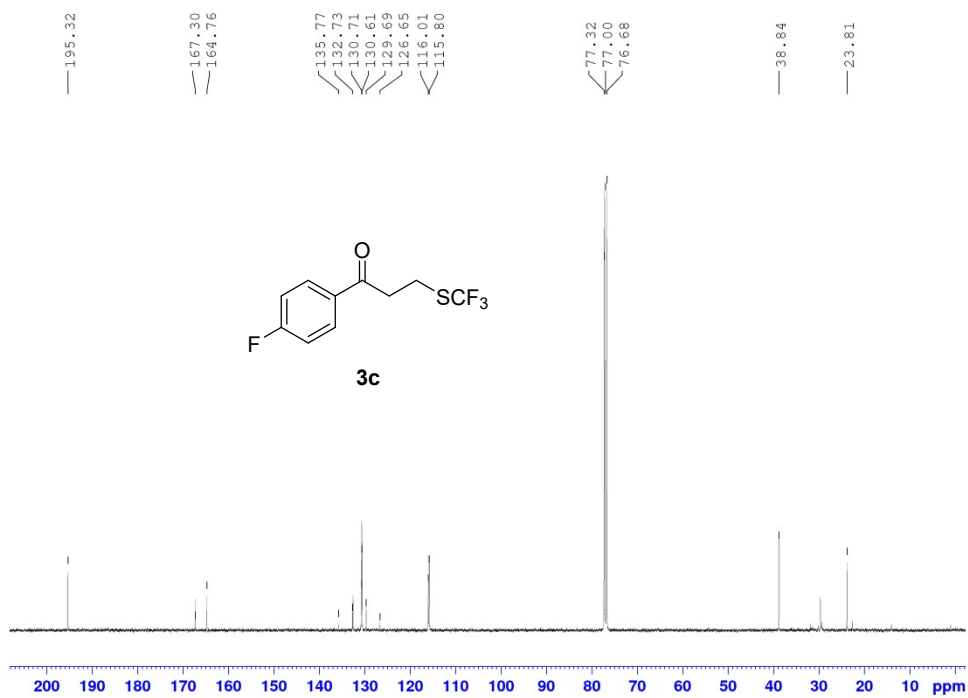

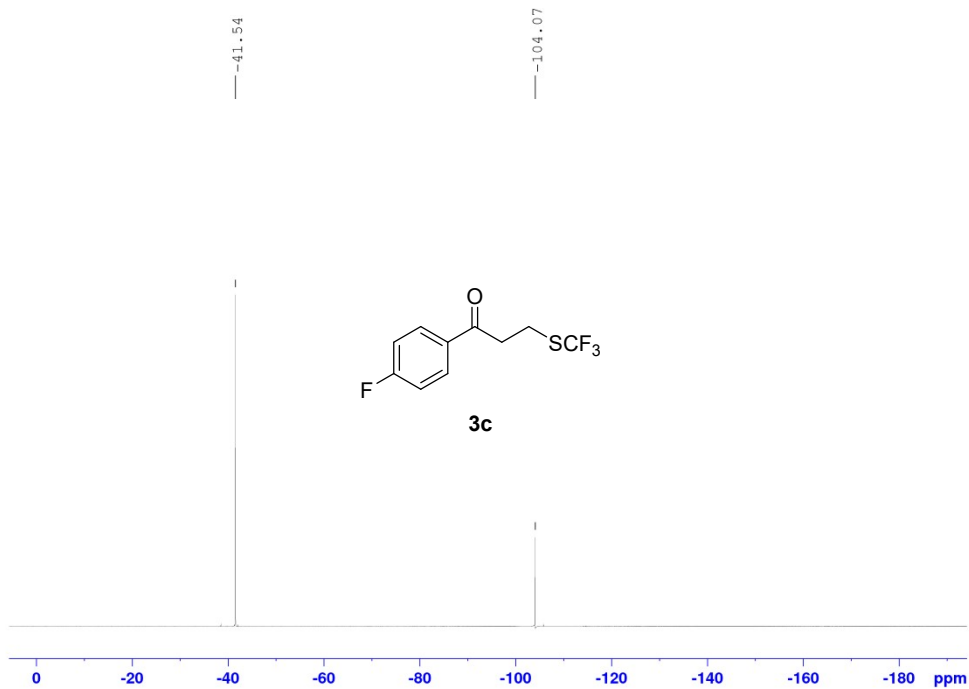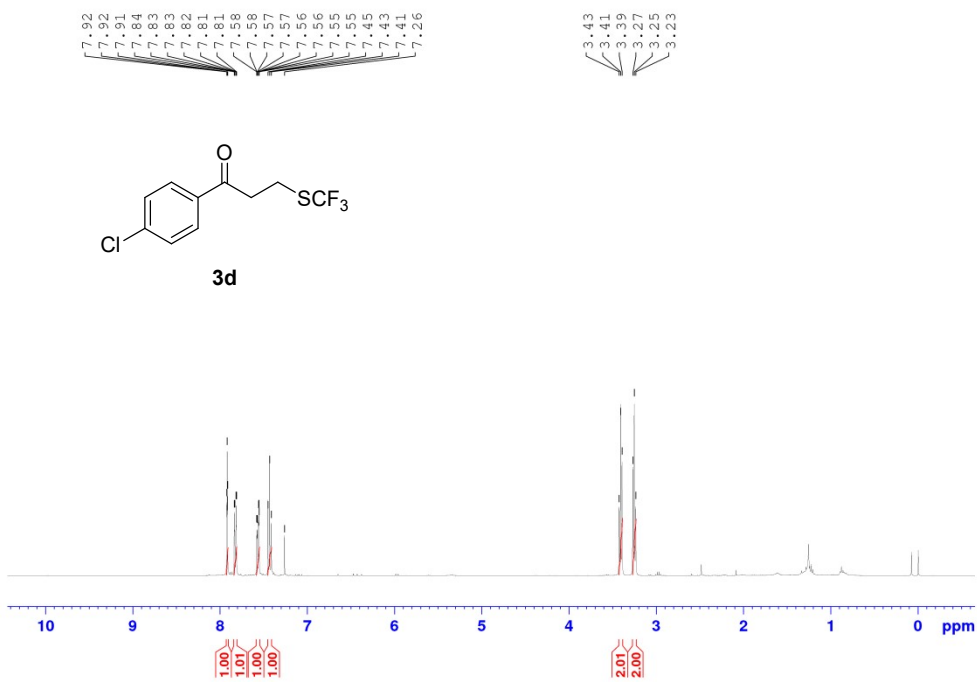

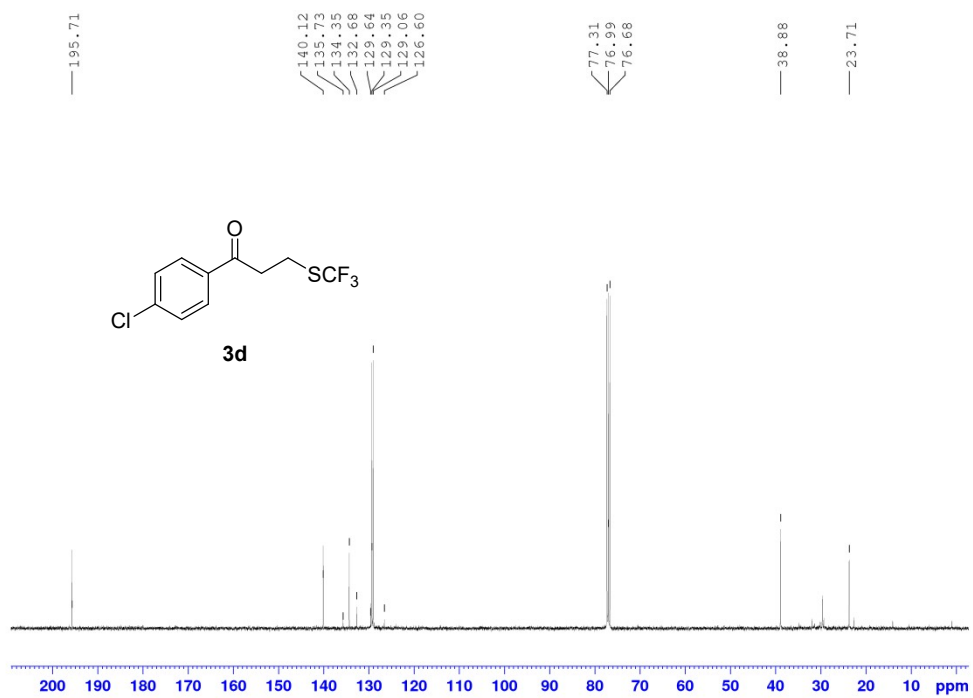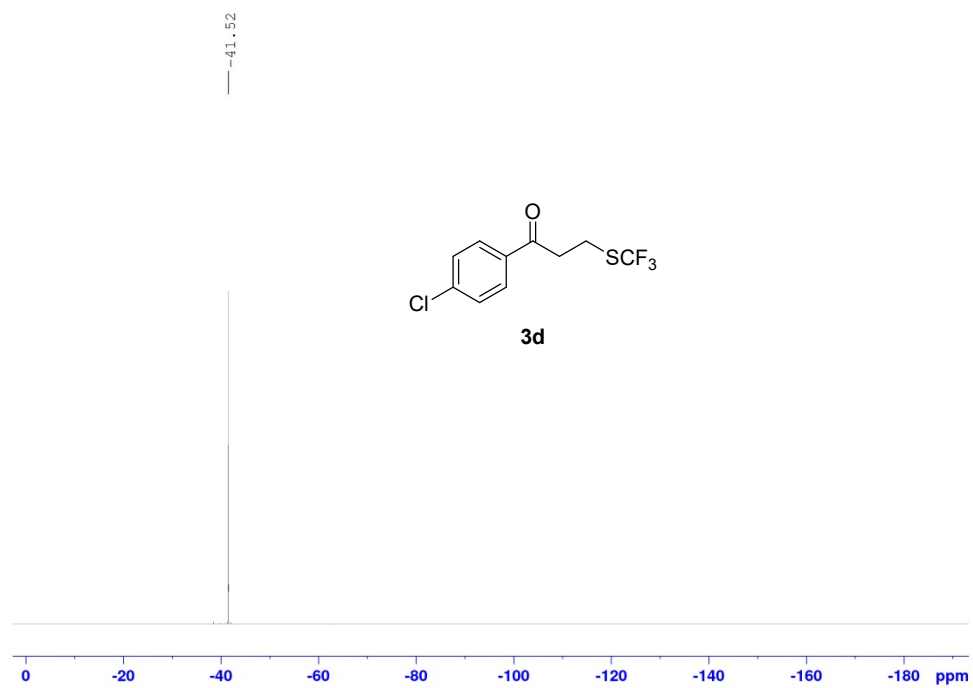

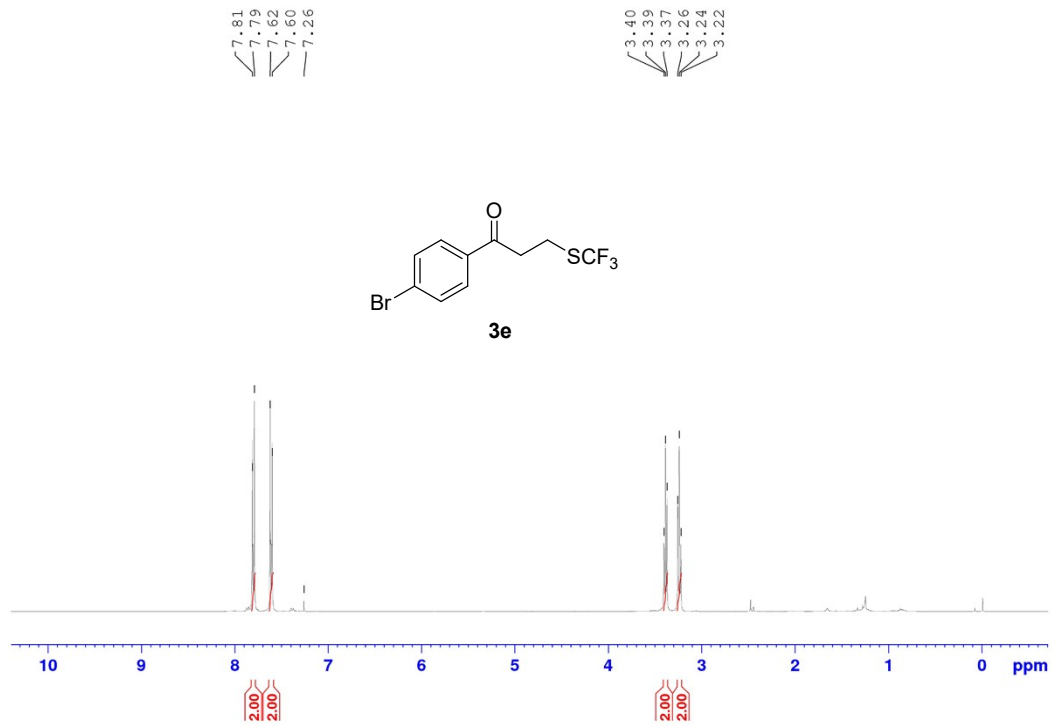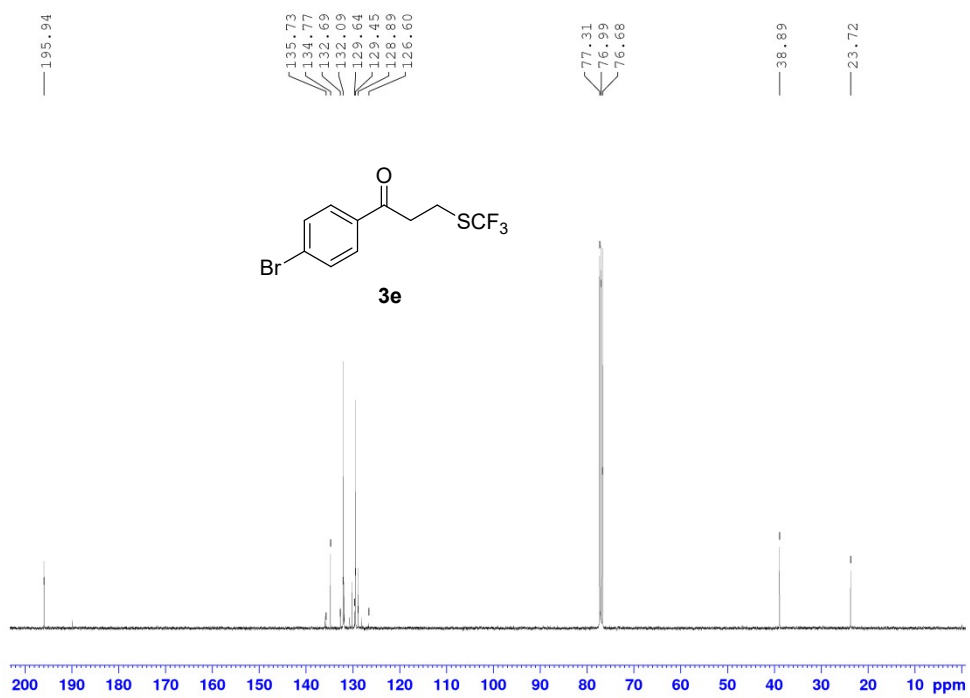

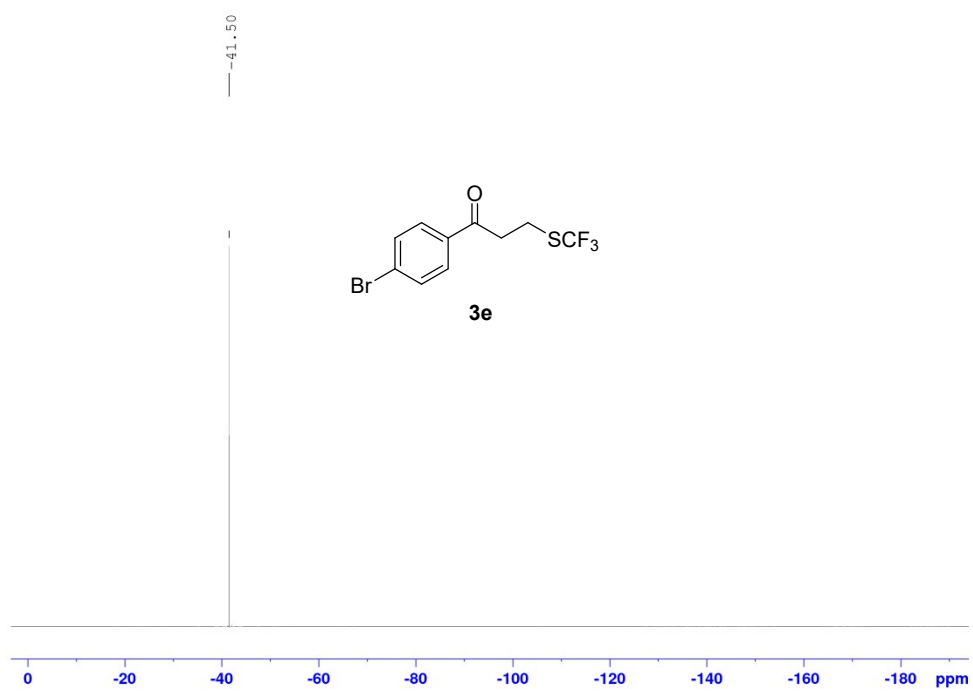

7.84  
7.82  
7.65  
7.63  
7.26

3.39  
3.37  
3.36  
3.25  
3.23  
3.22

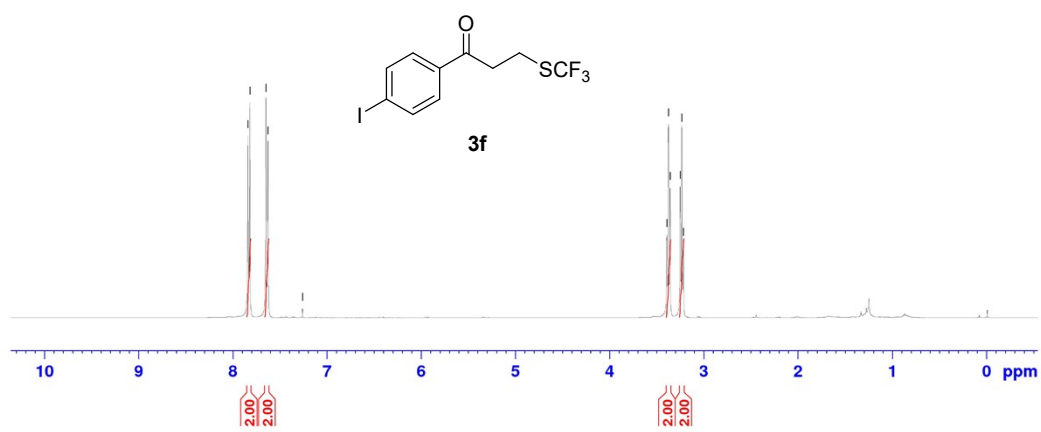

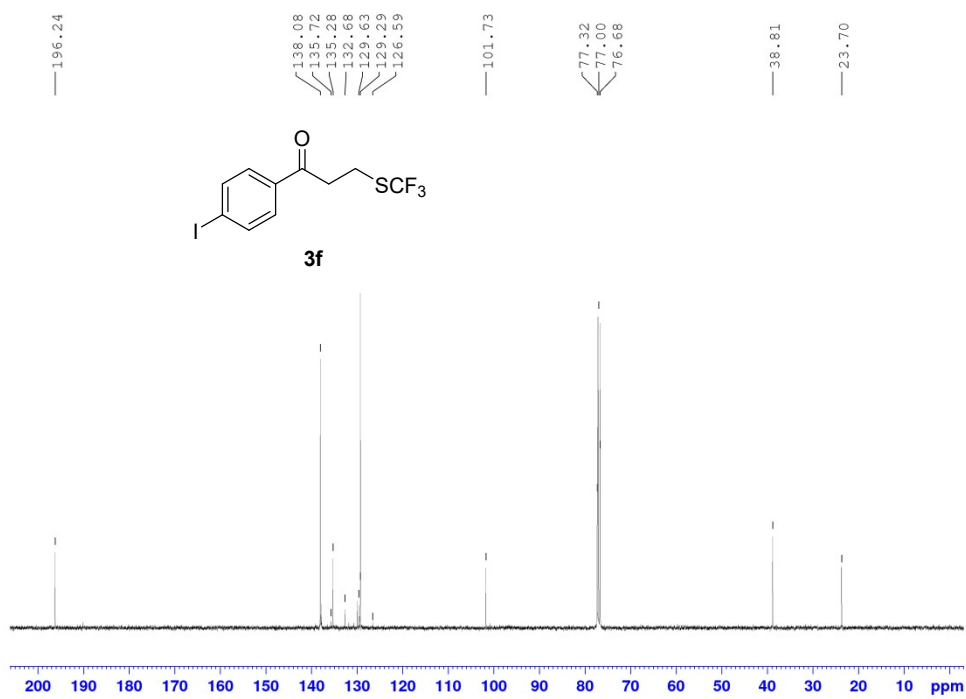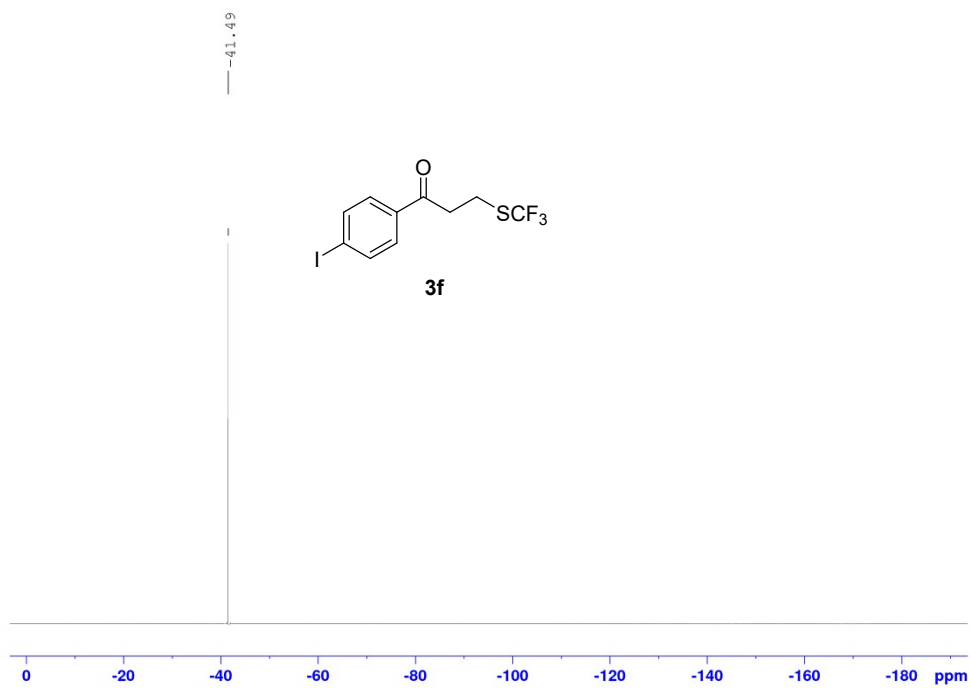



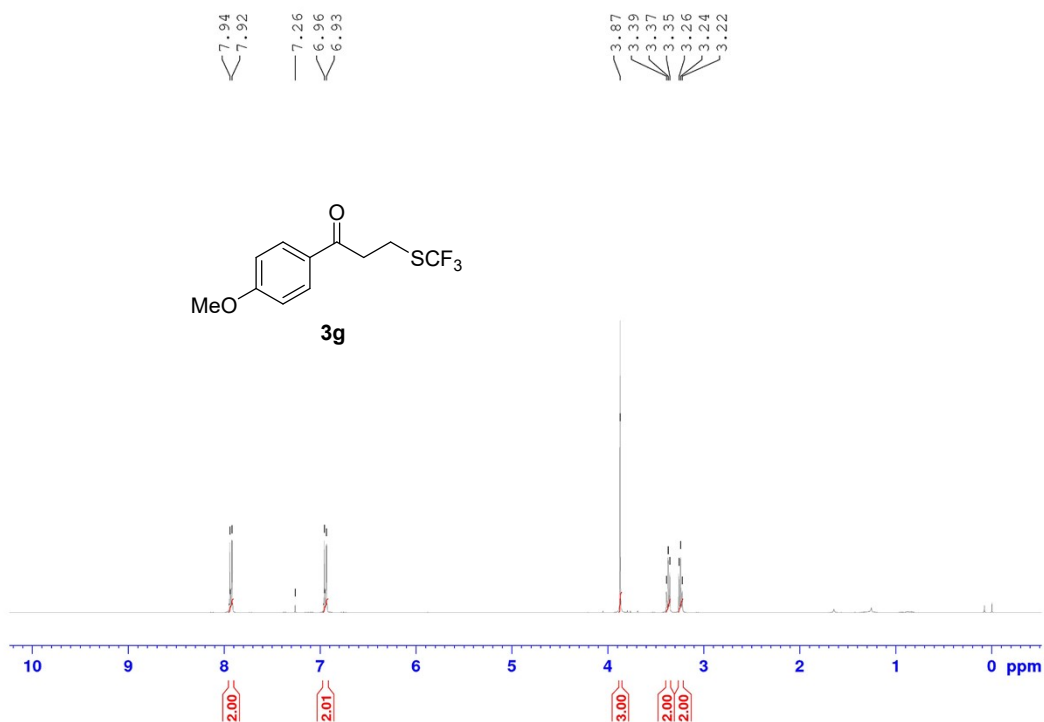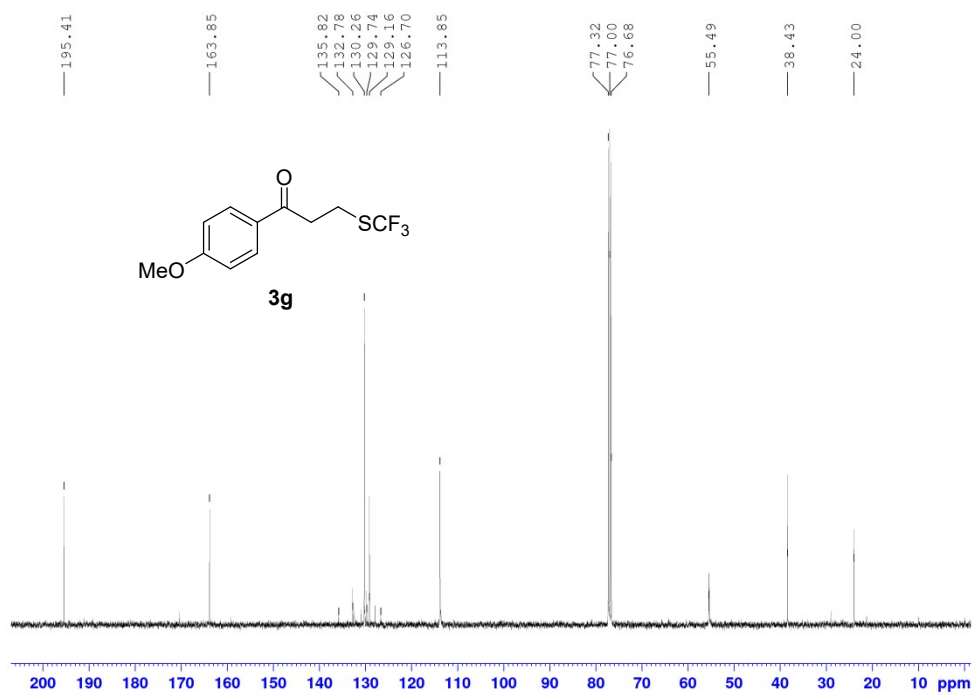

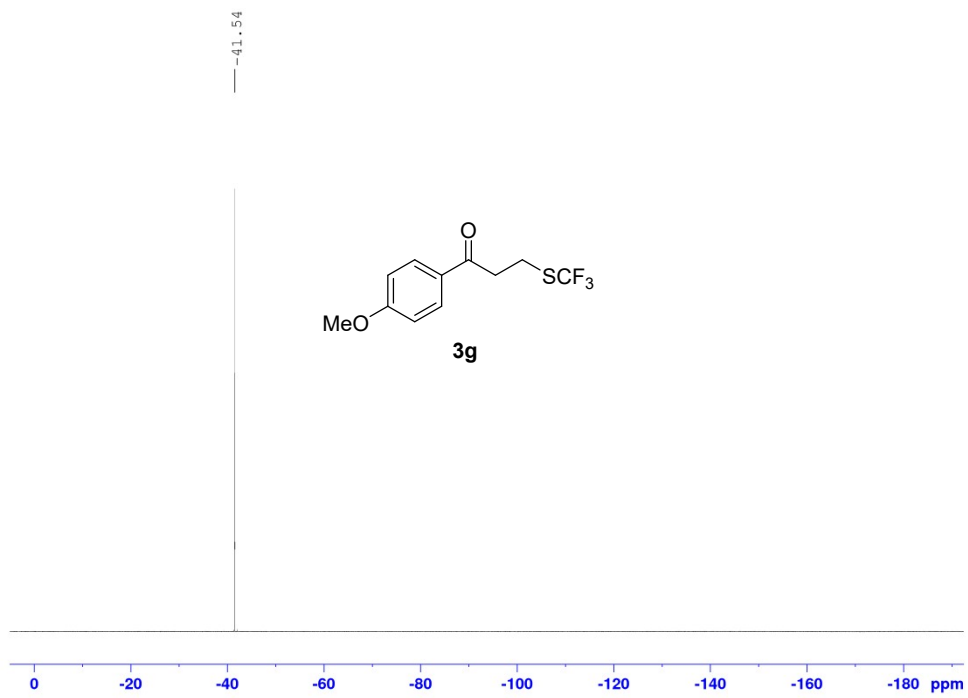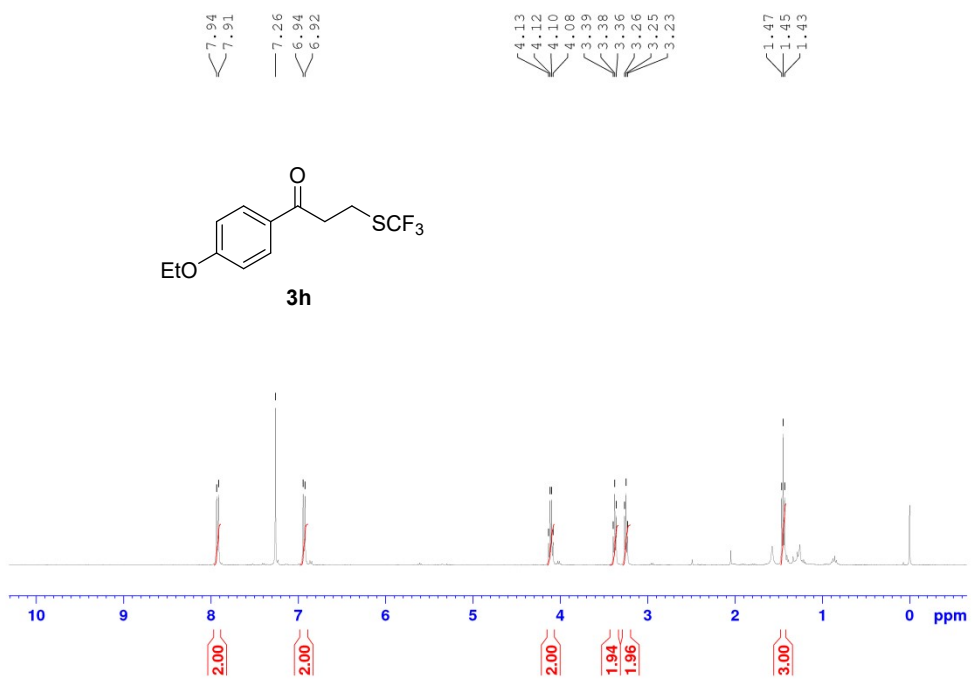

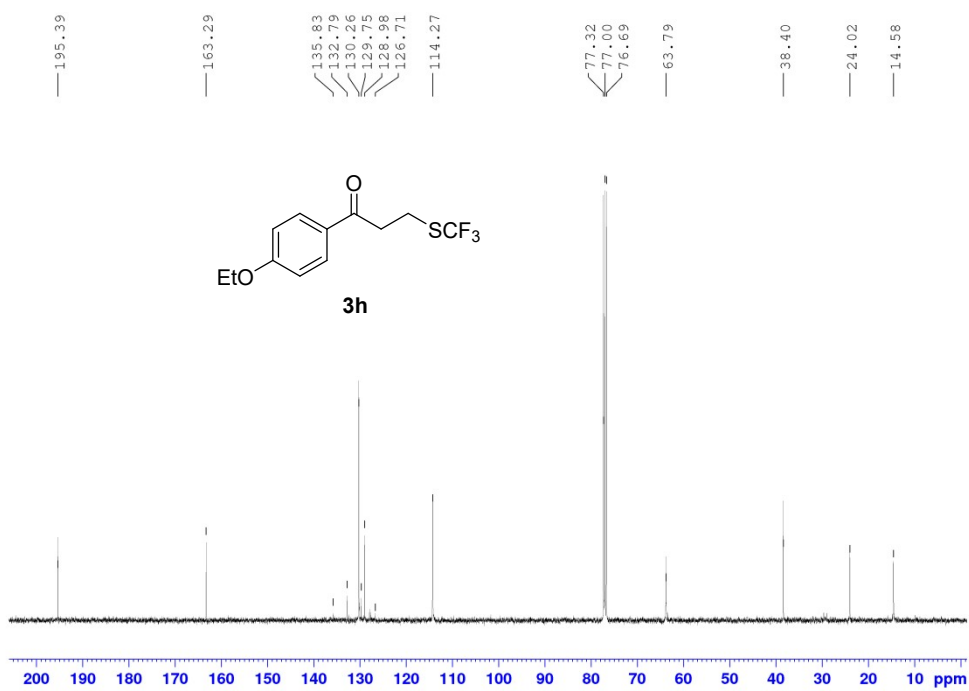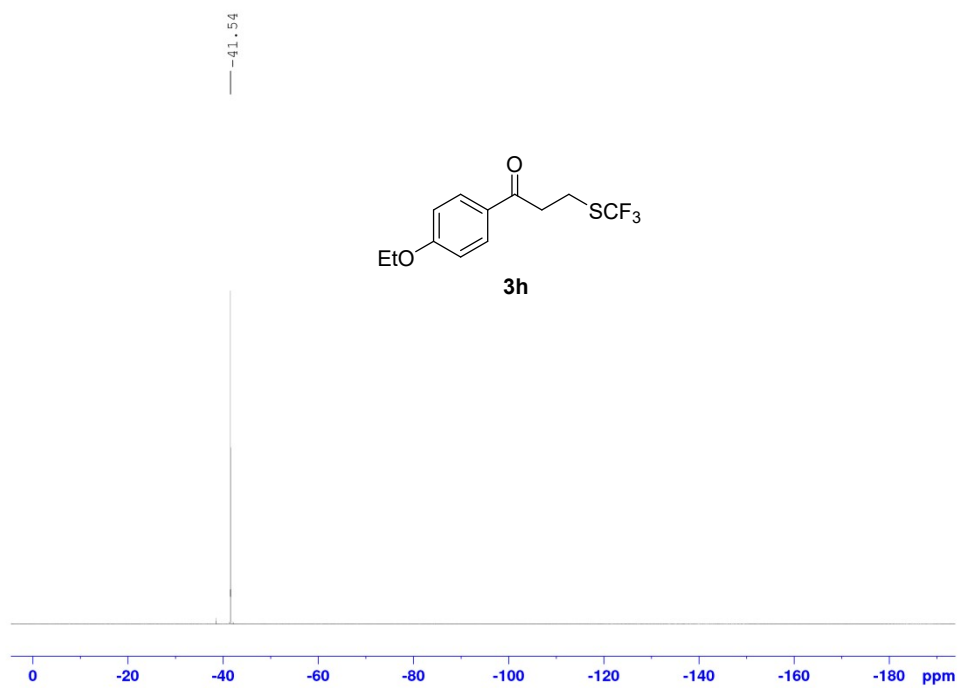

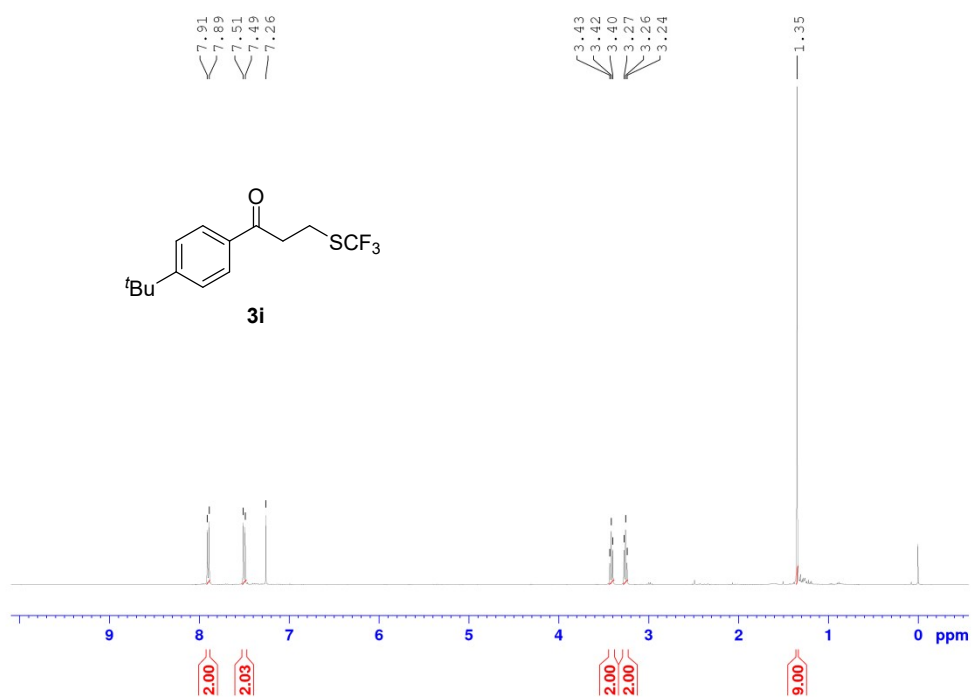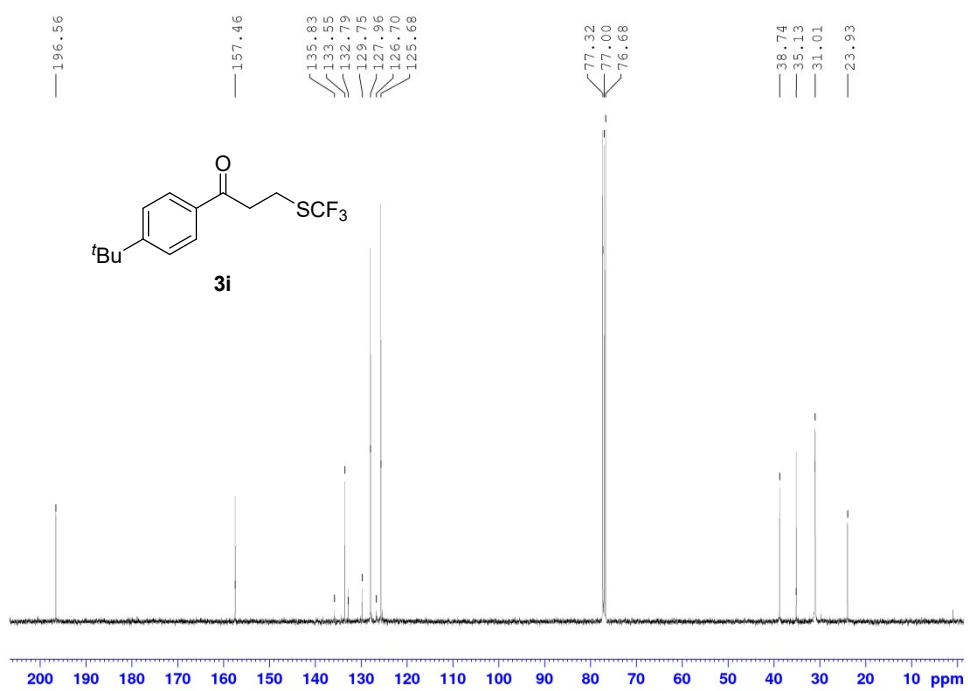

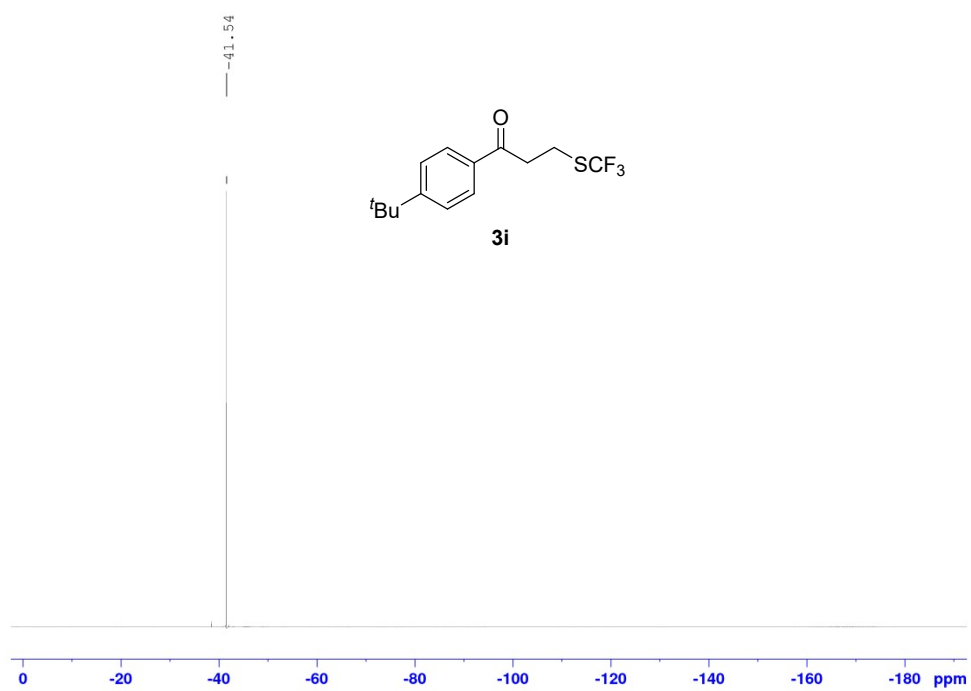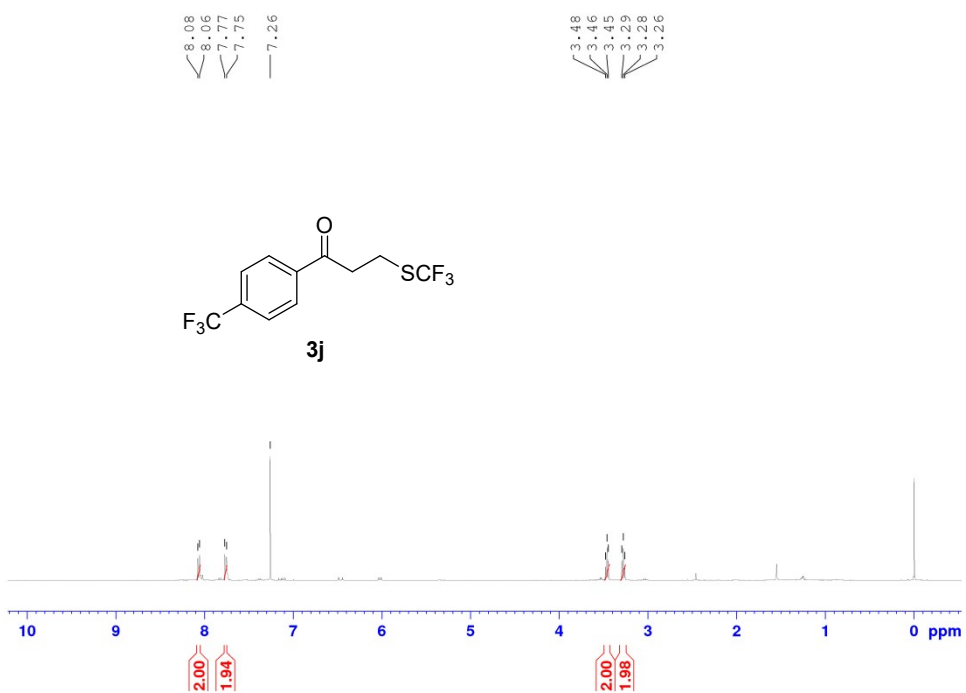

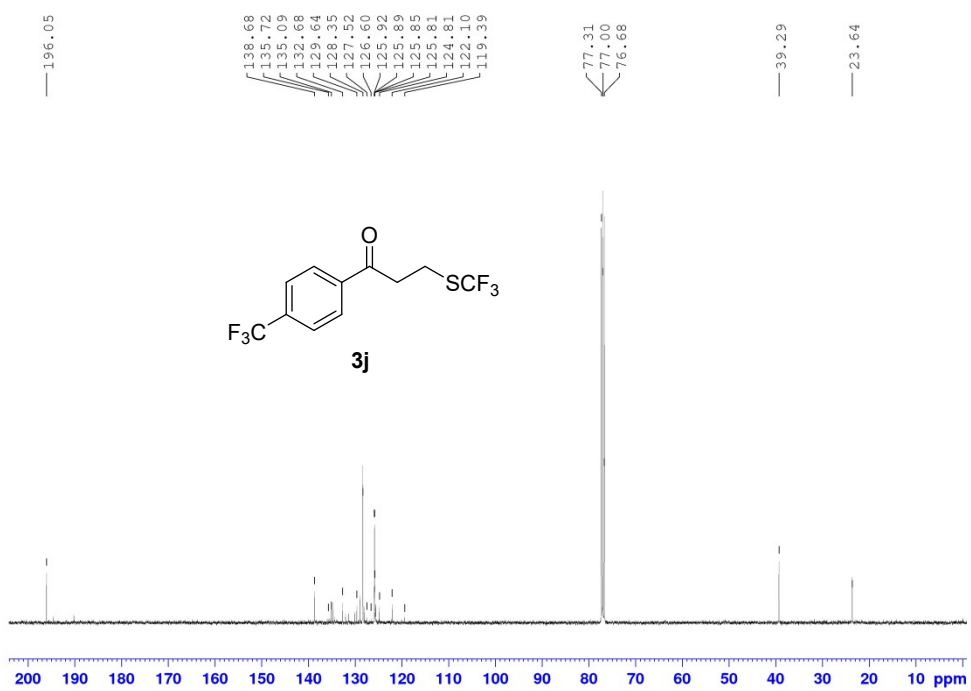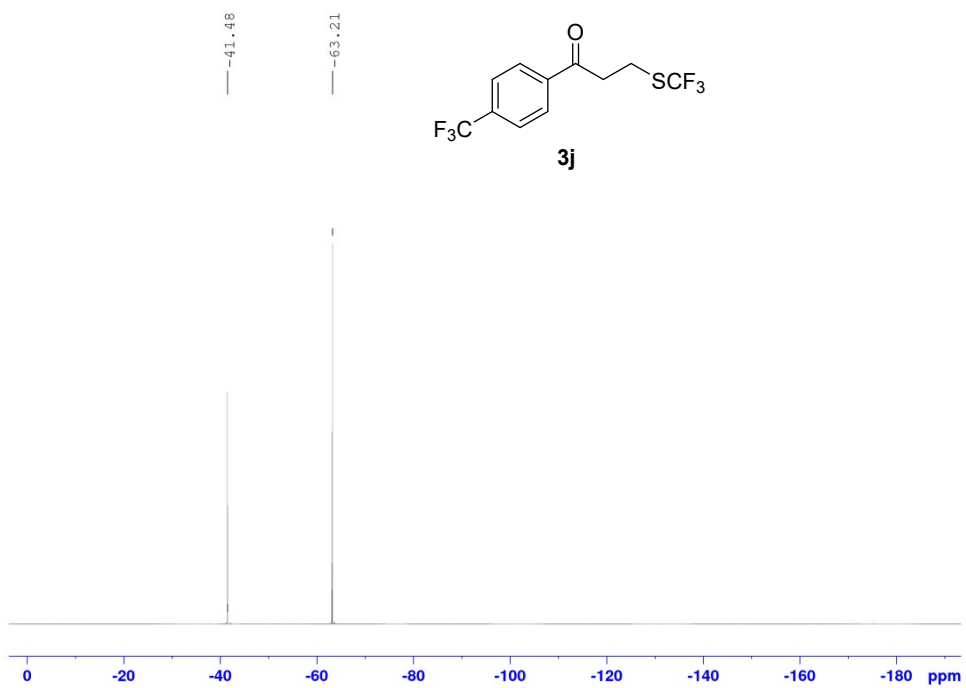

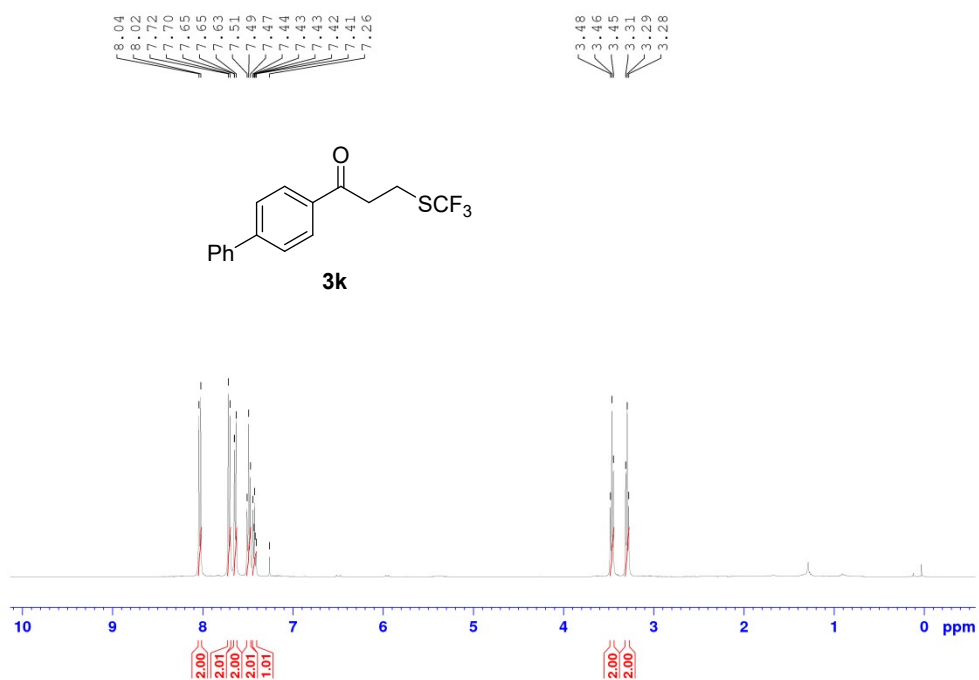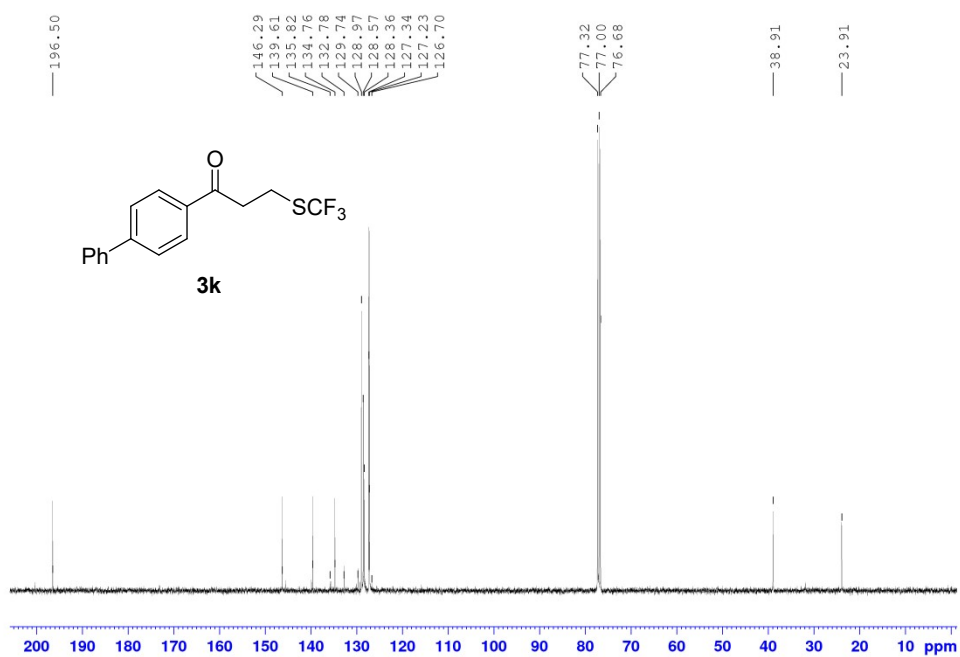

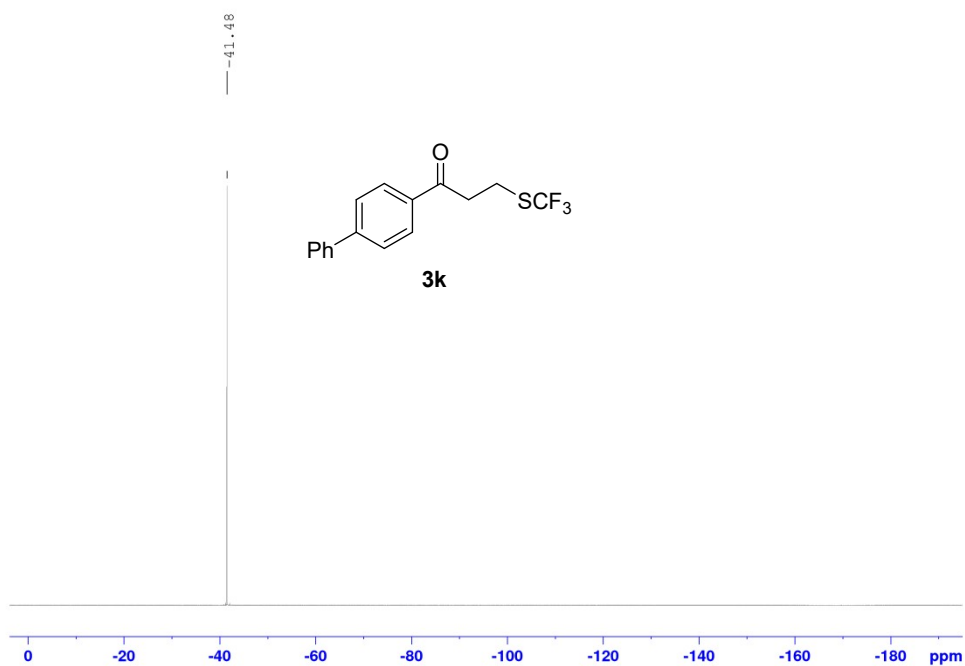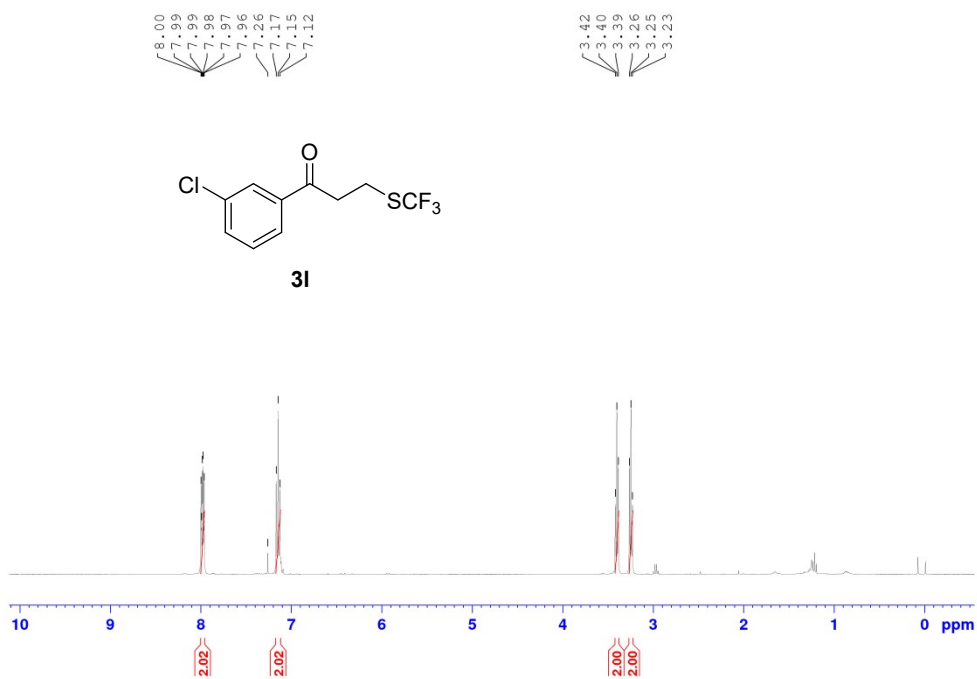



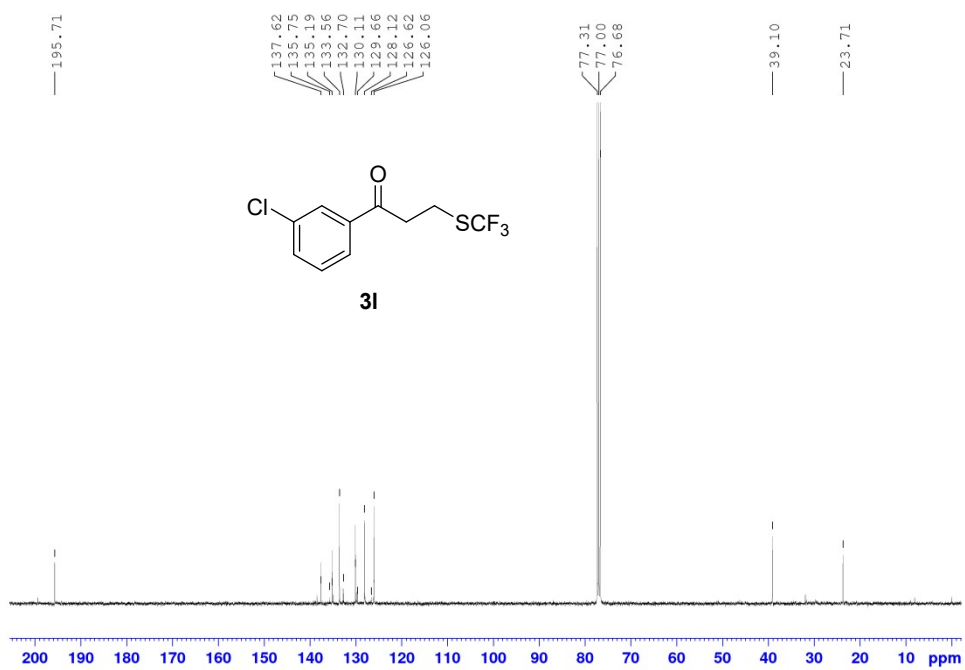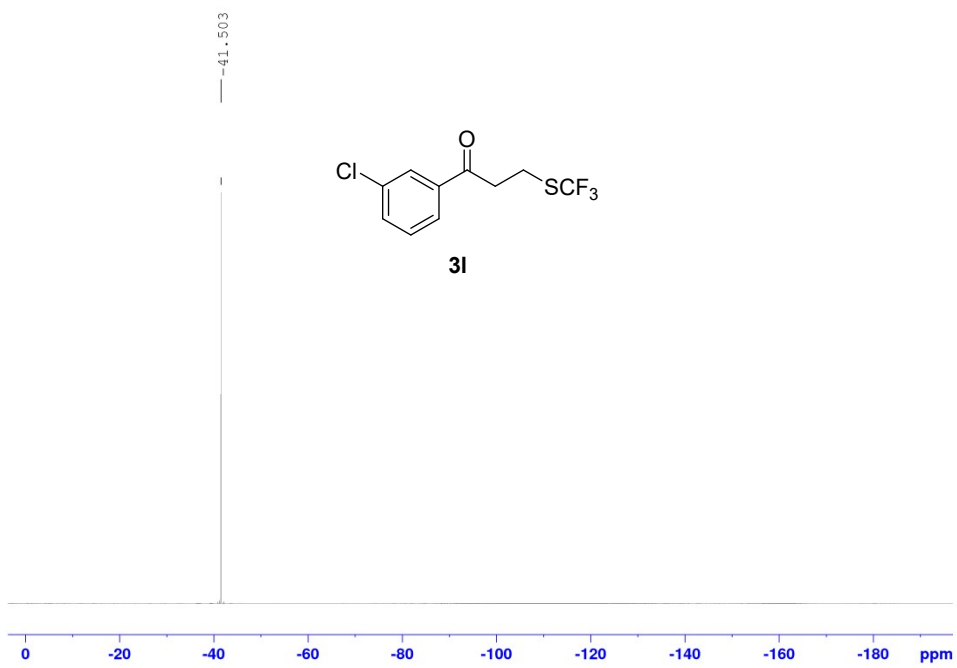

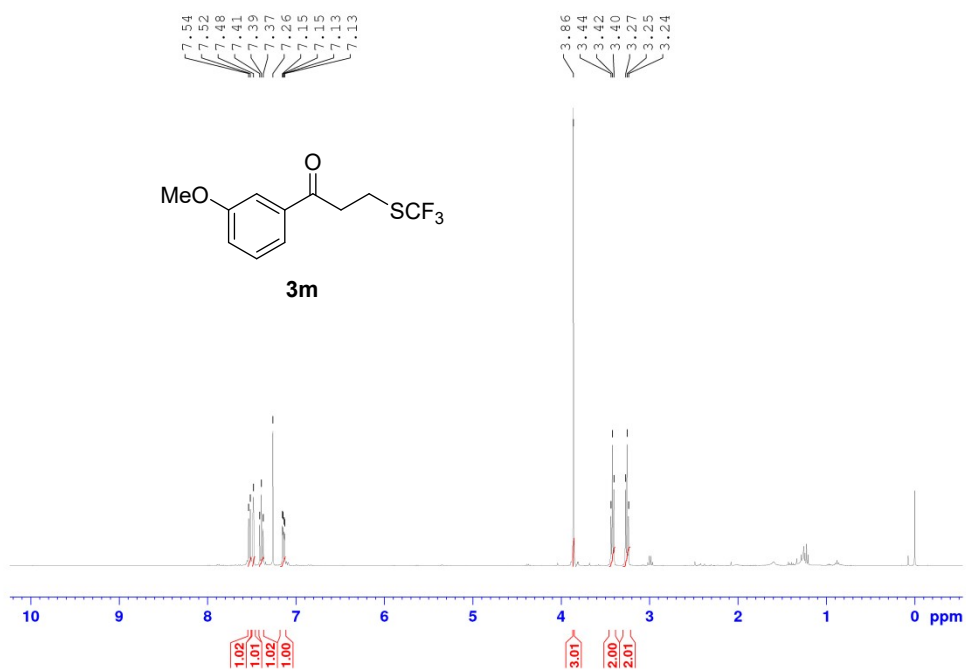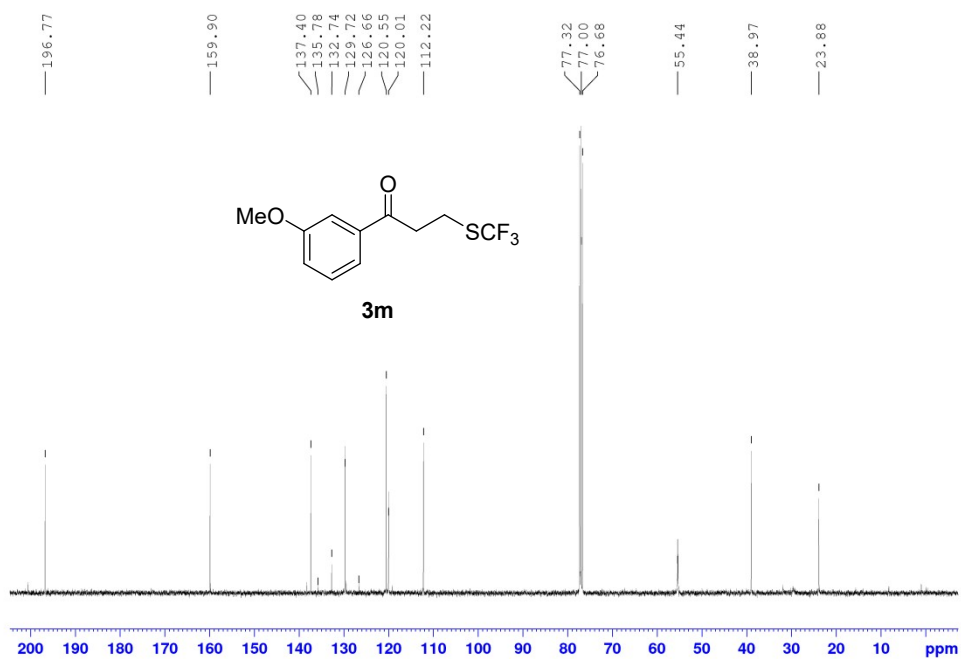

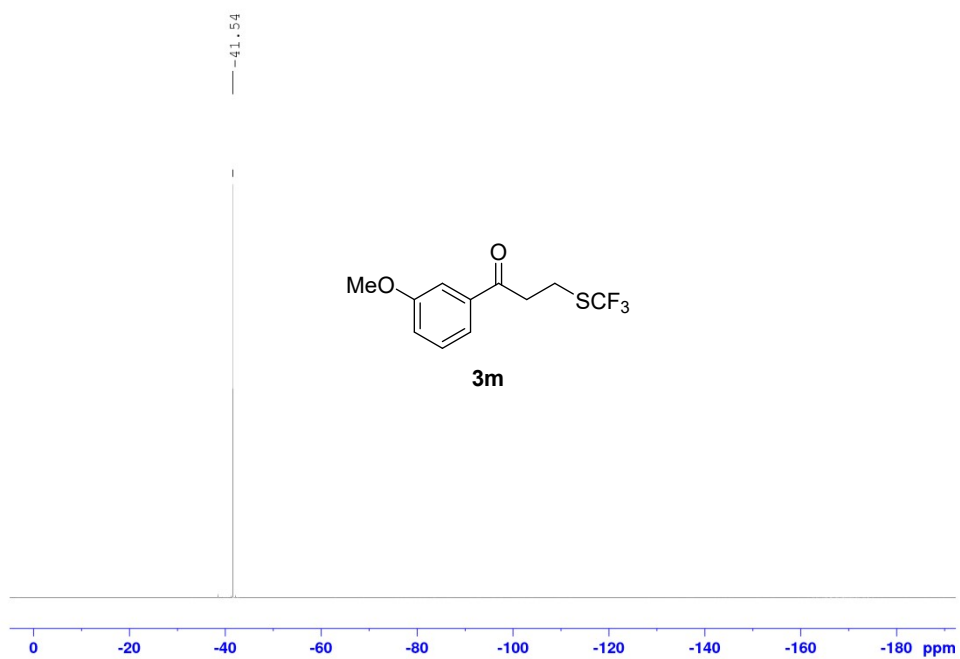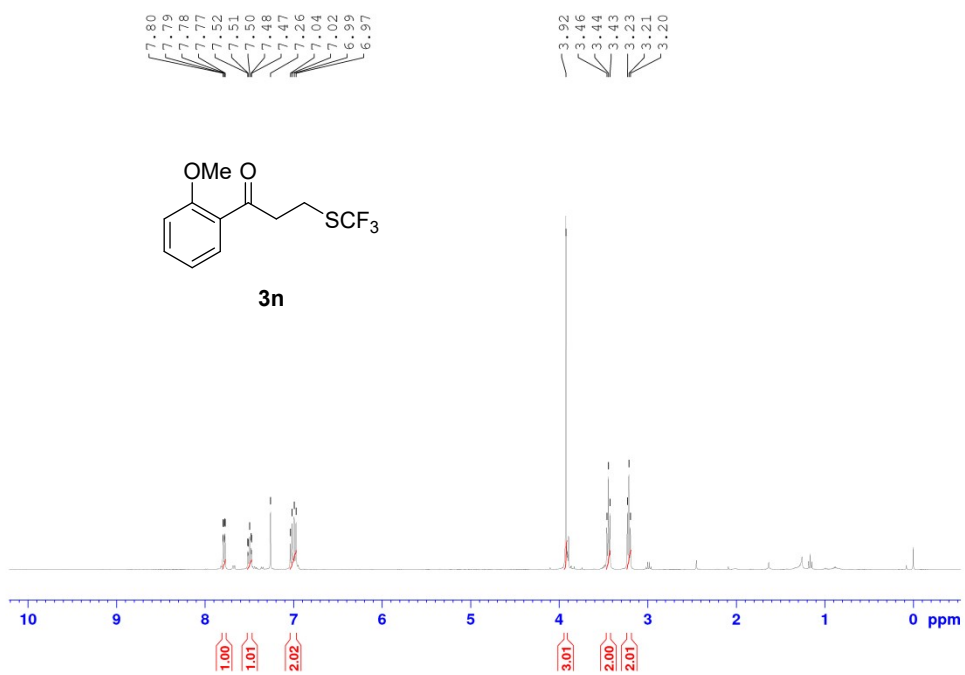

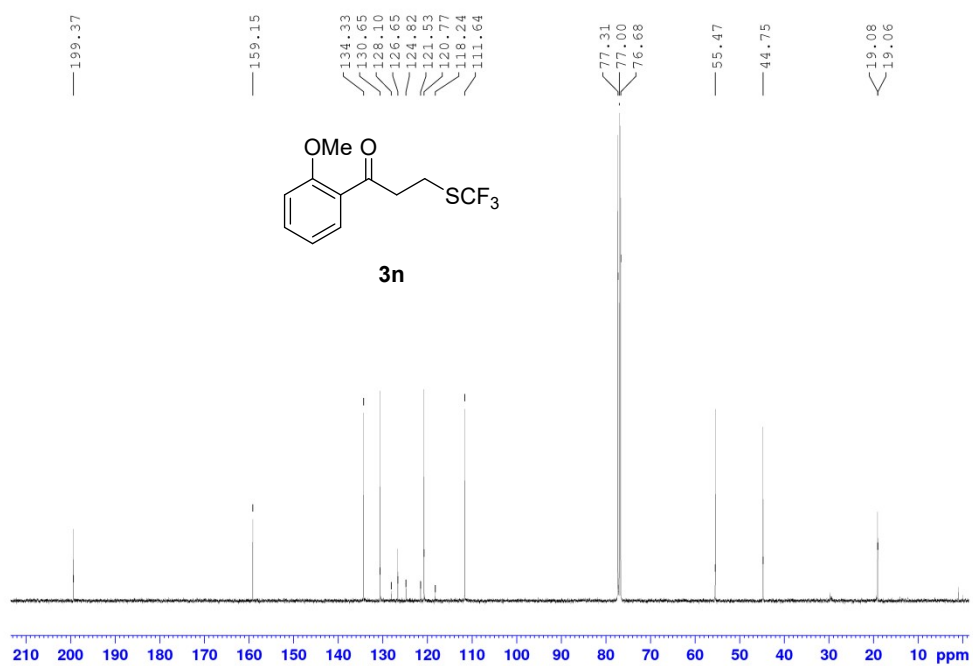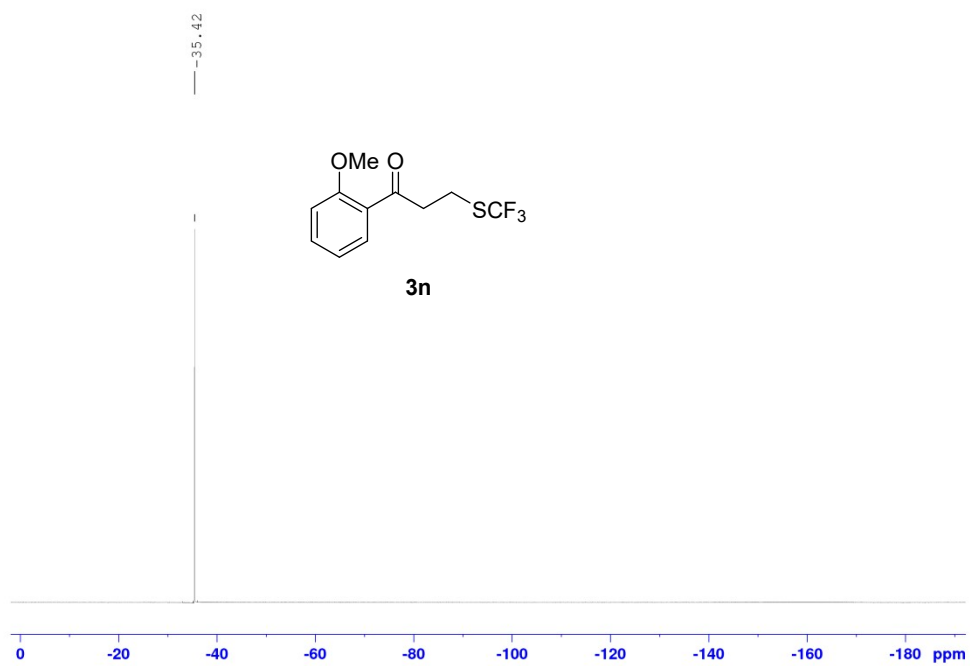

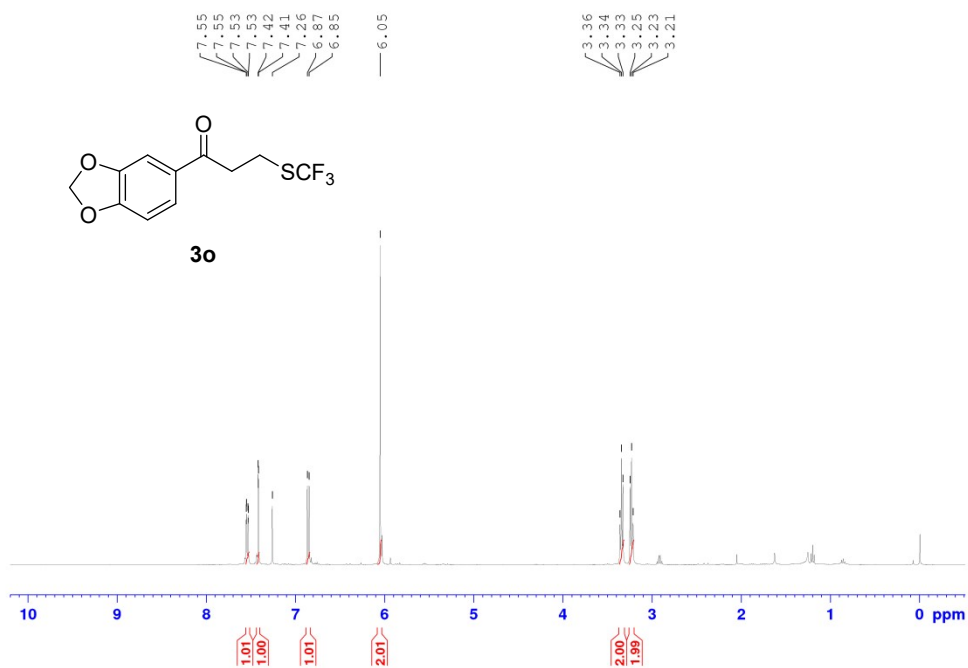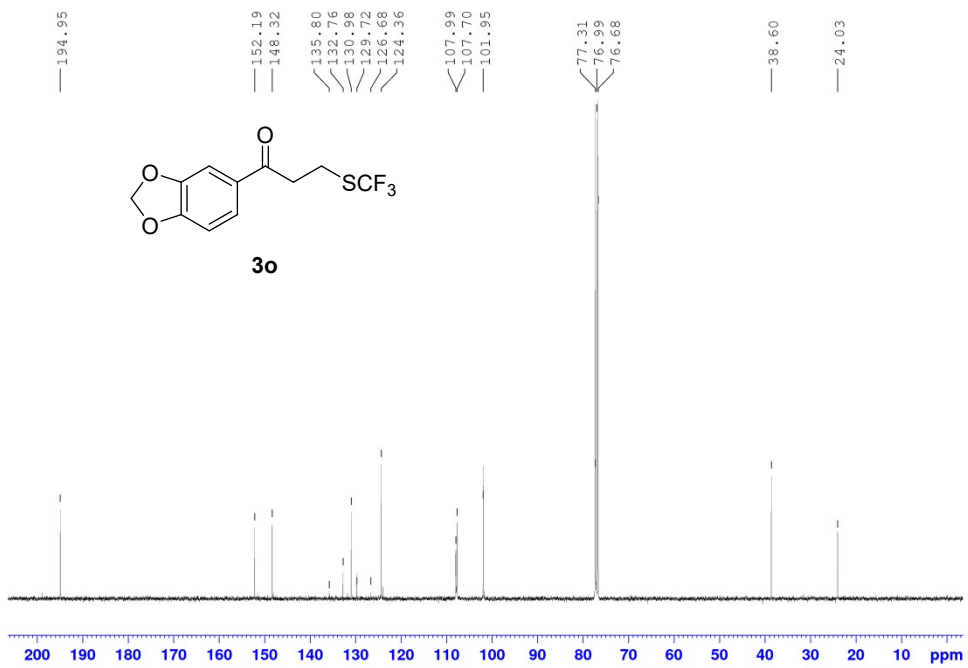

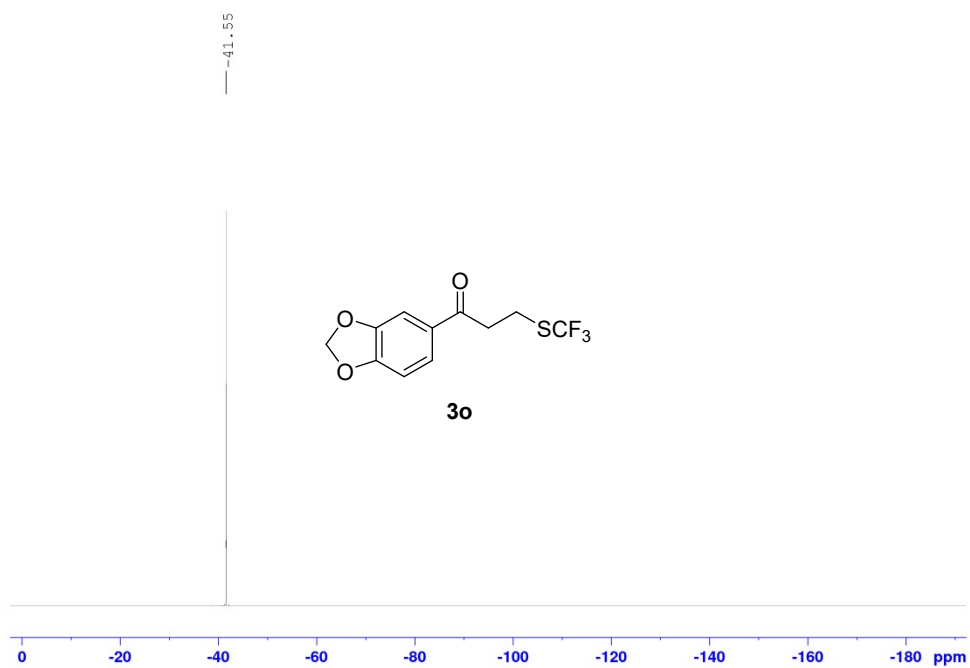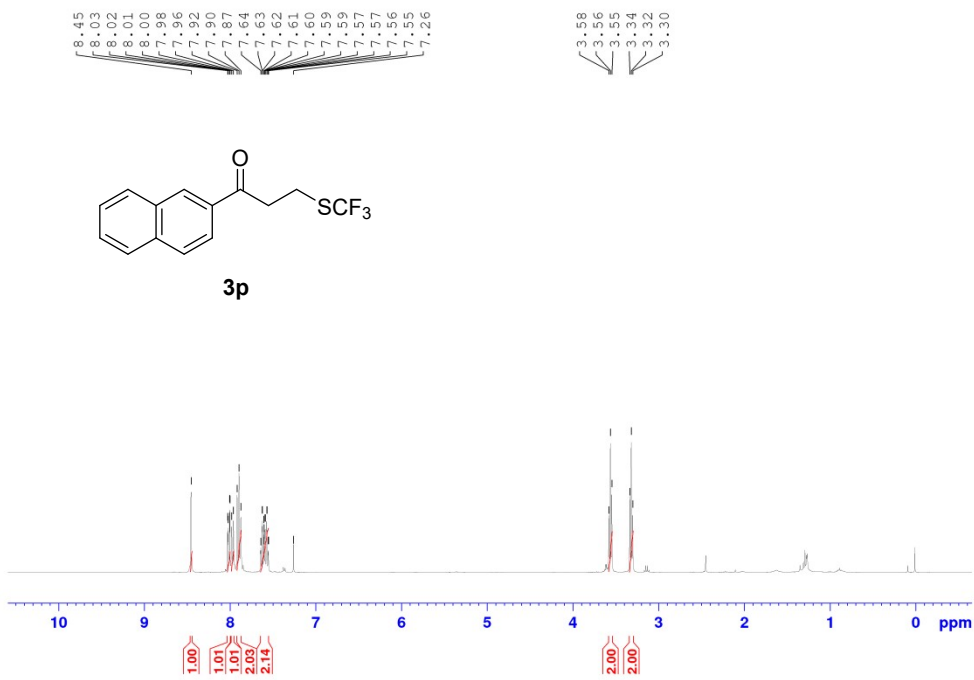

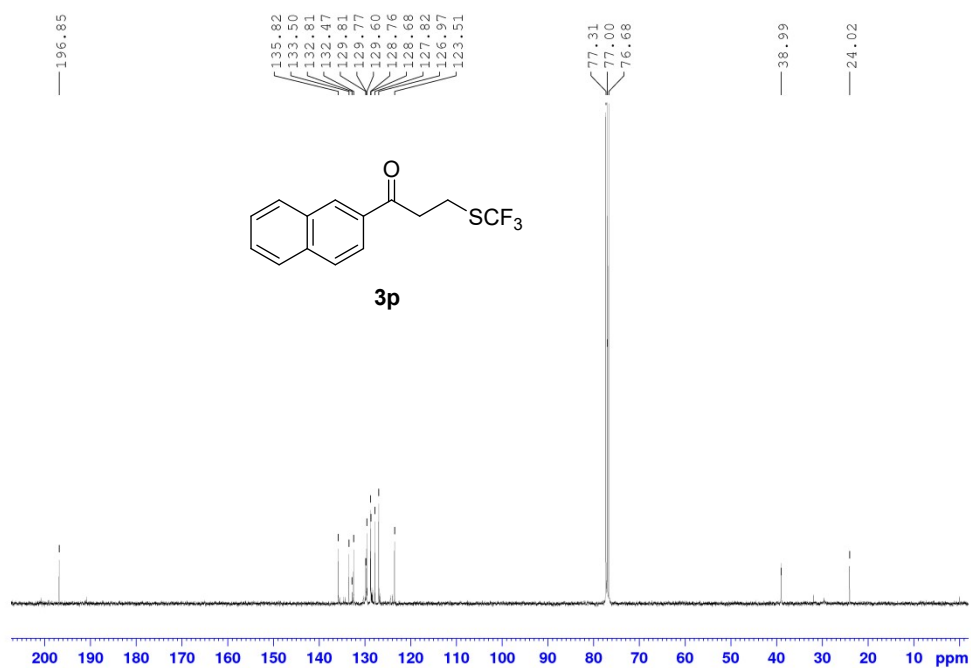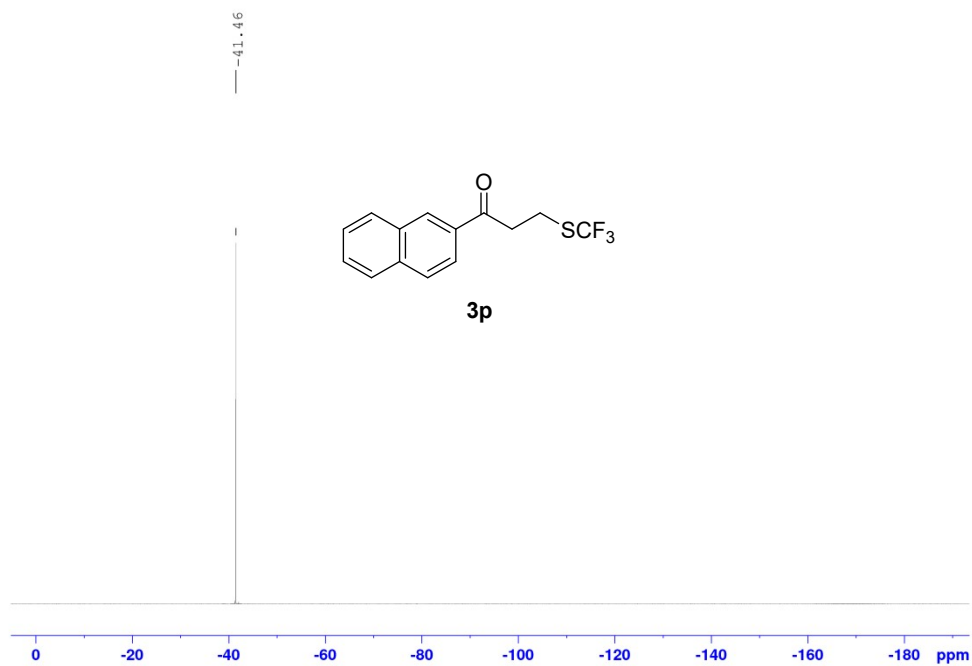

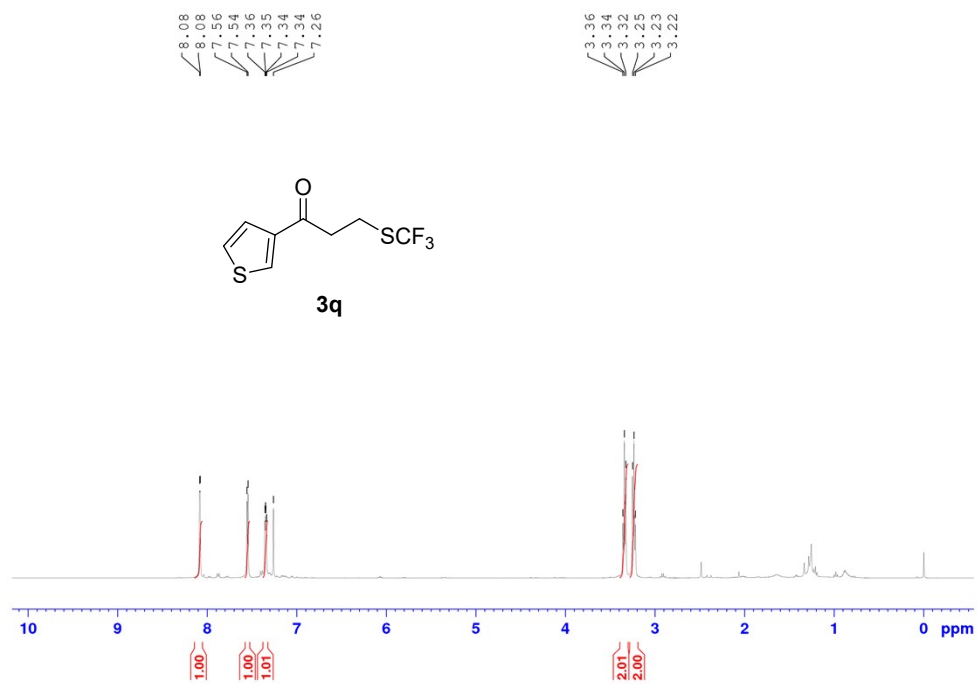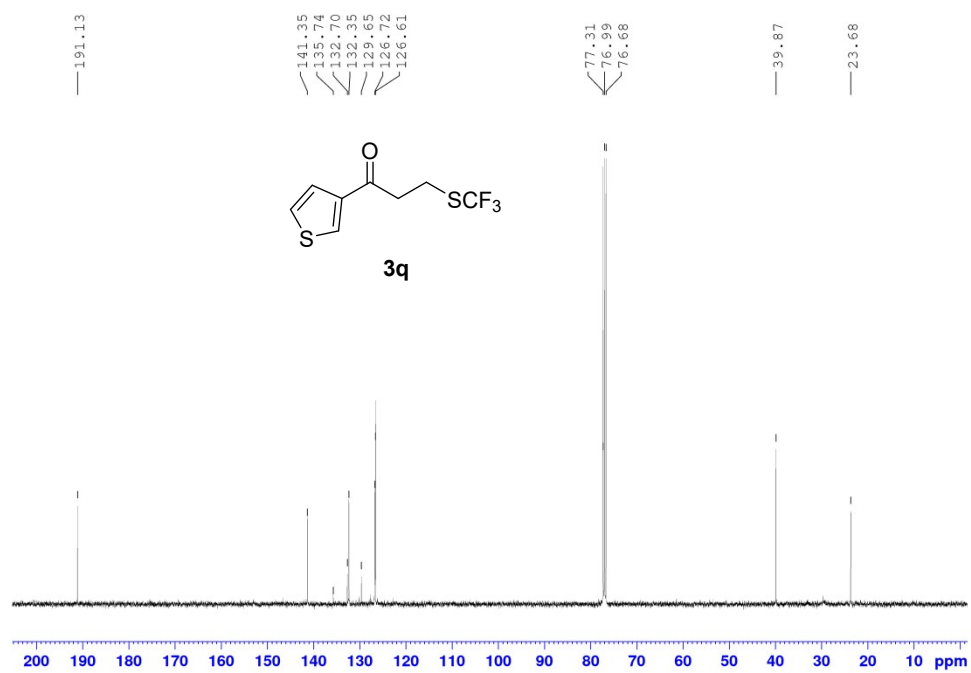



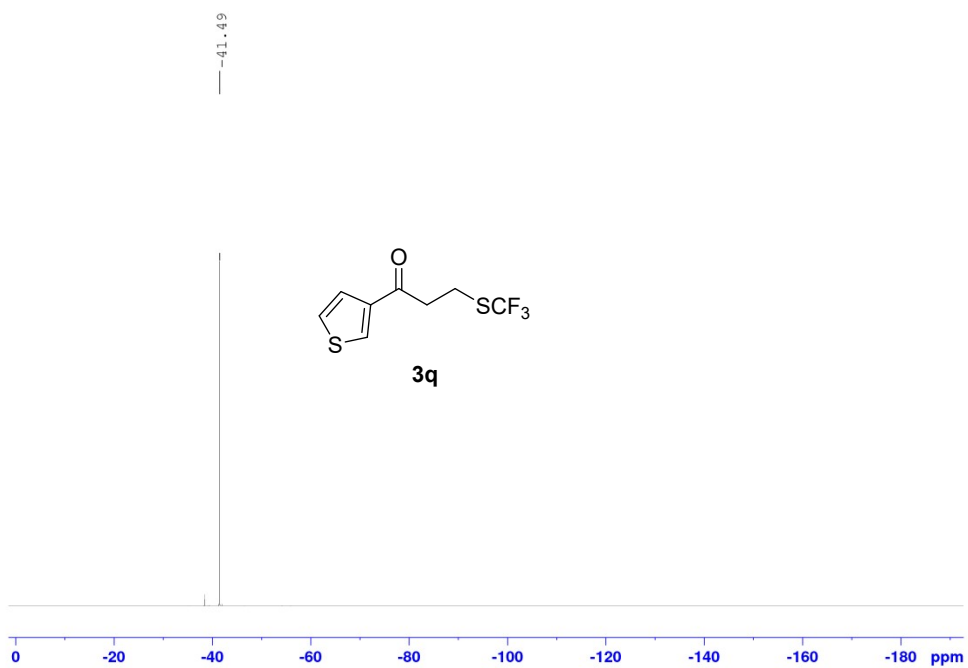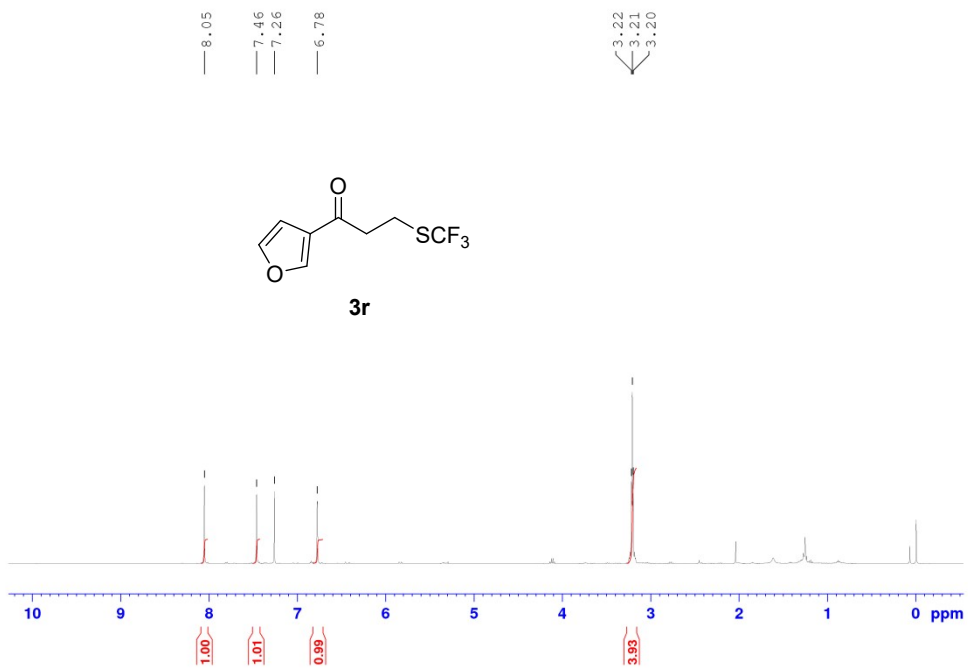

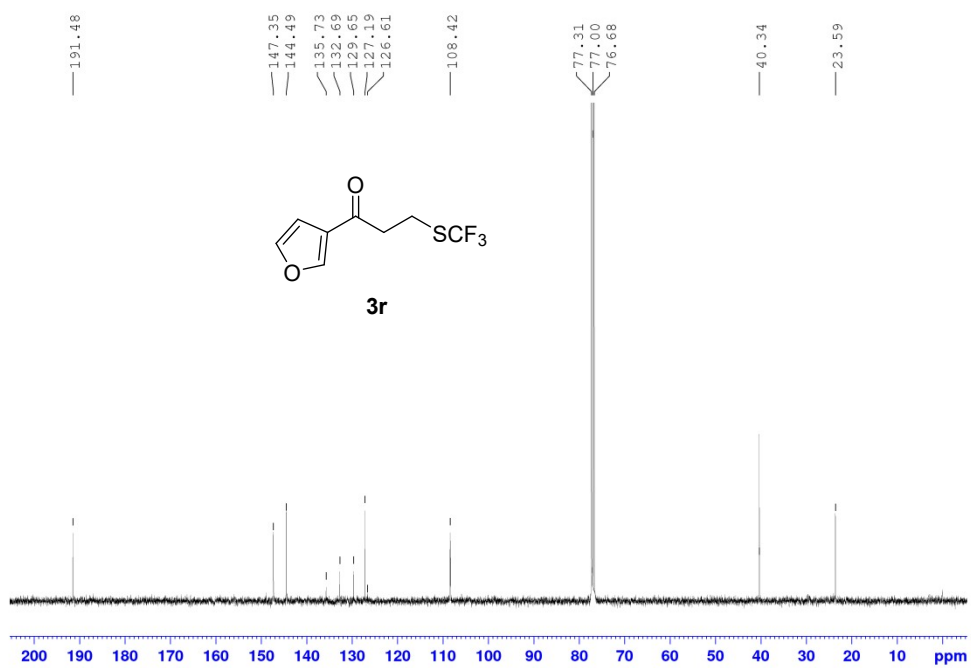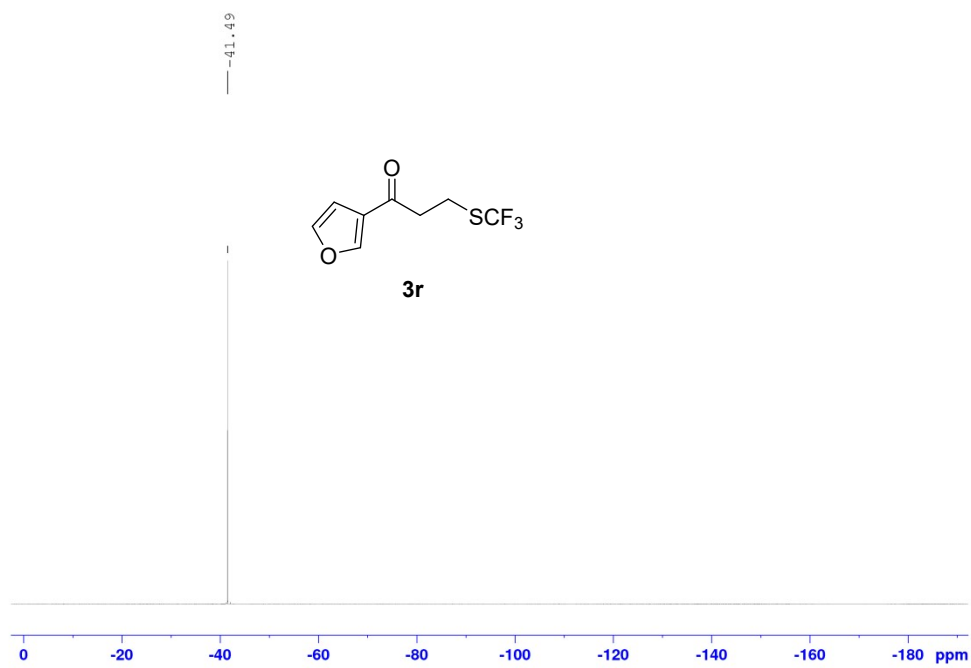

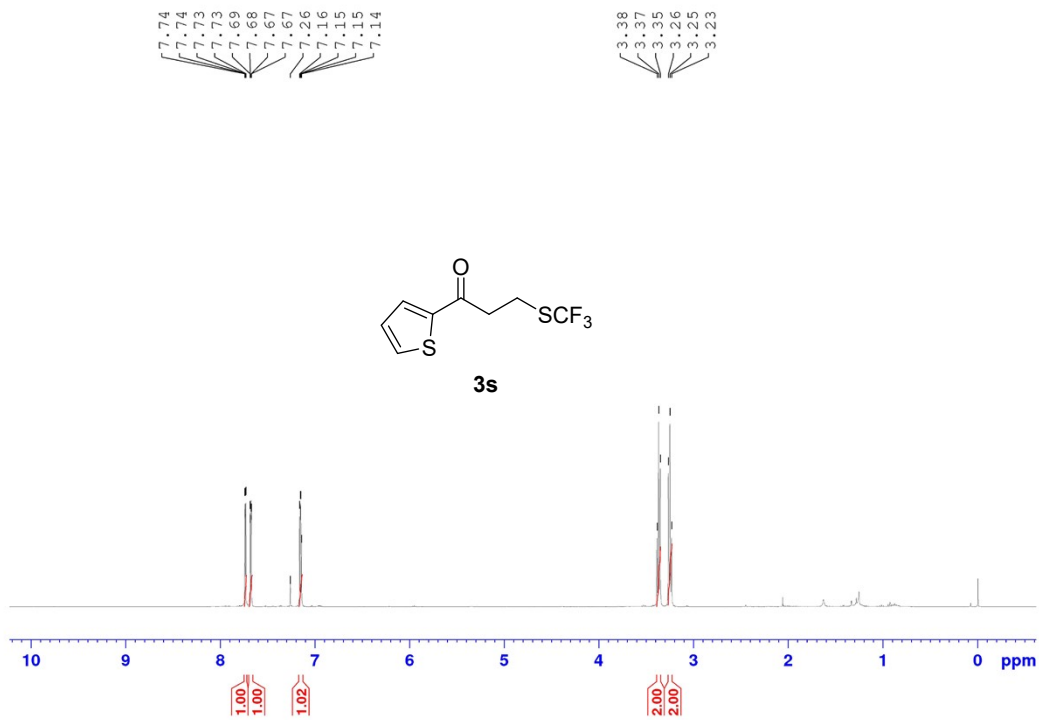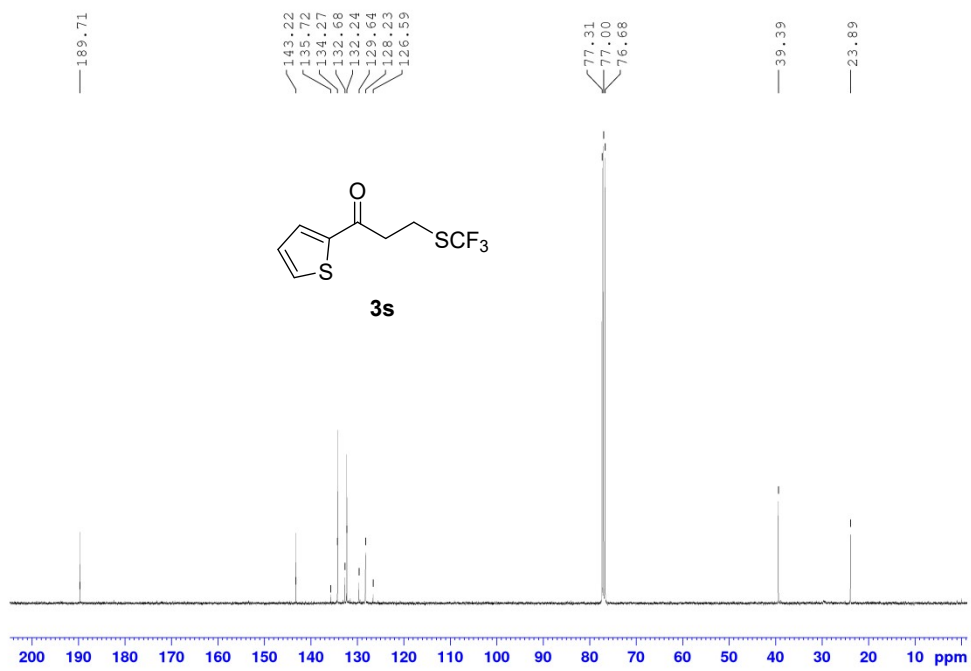

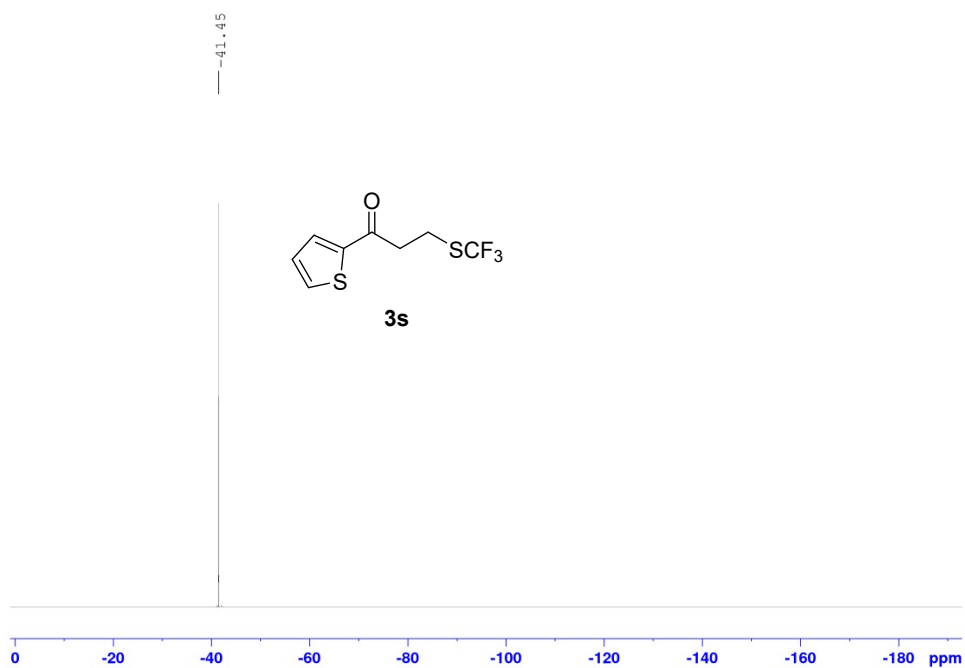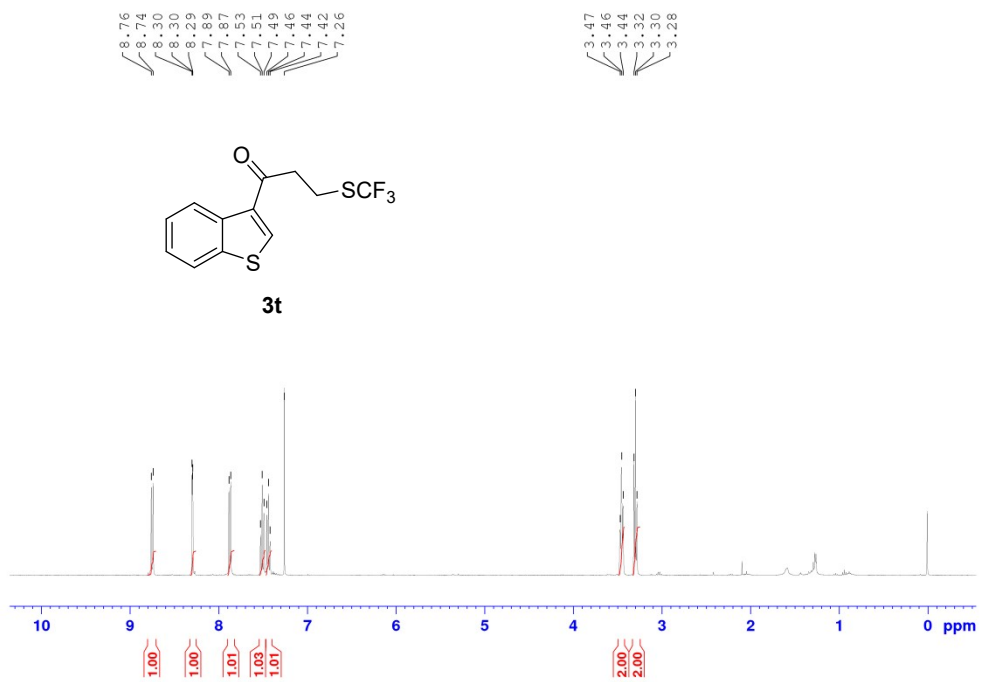

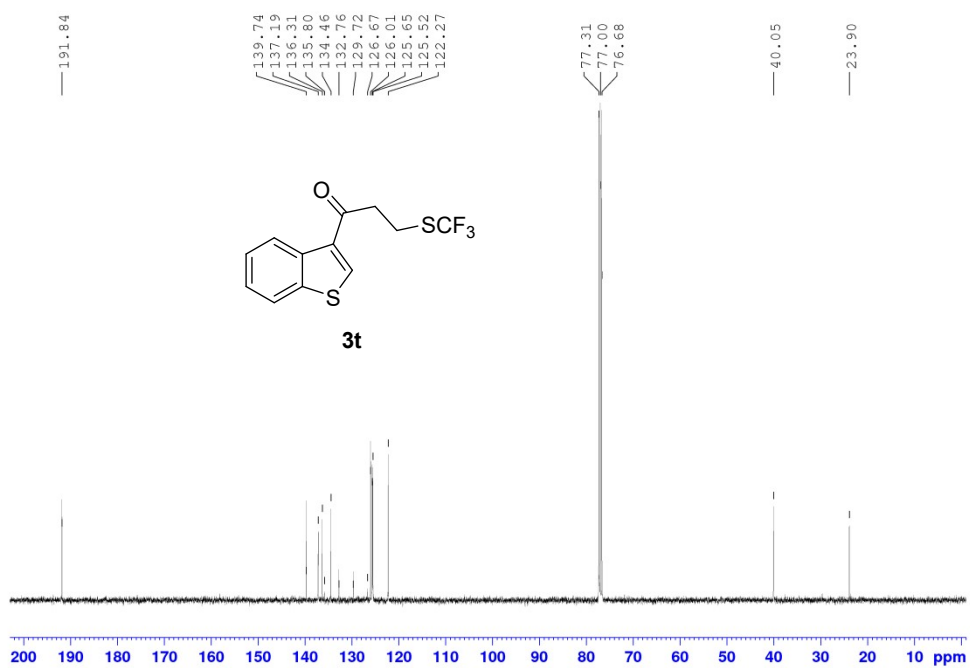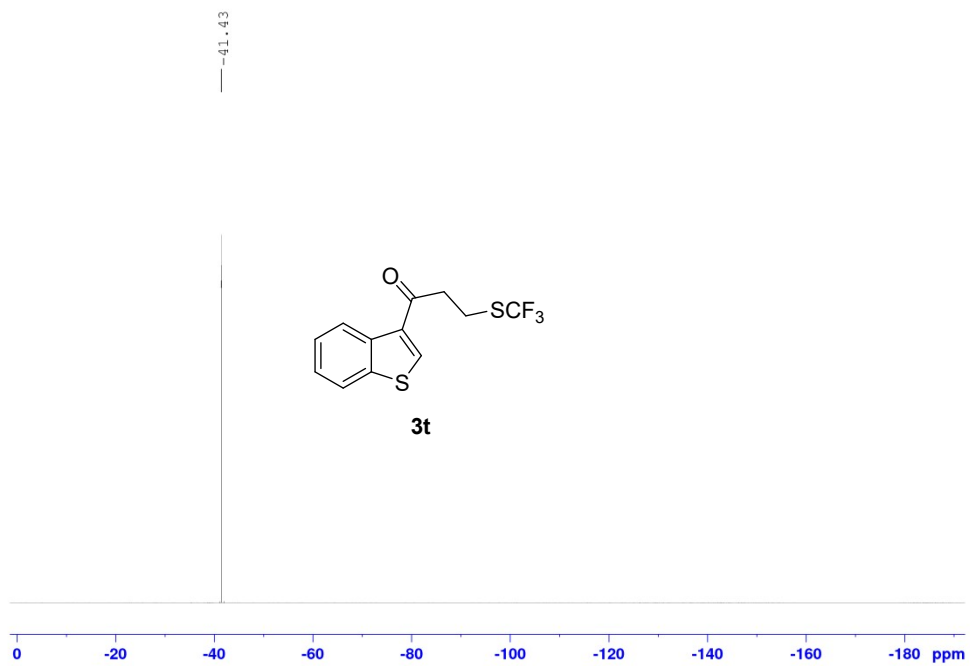

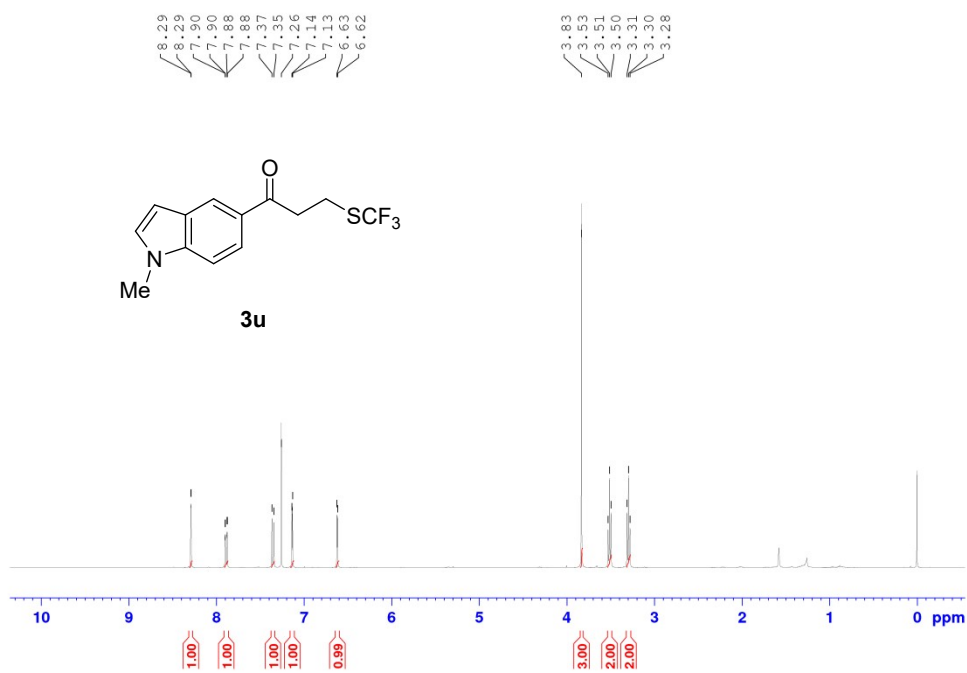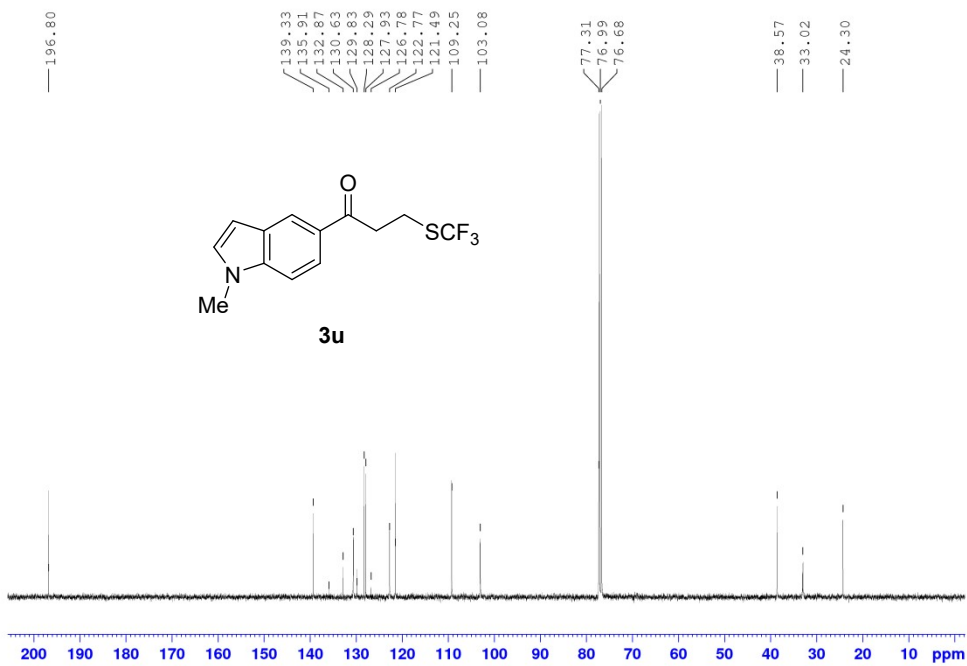

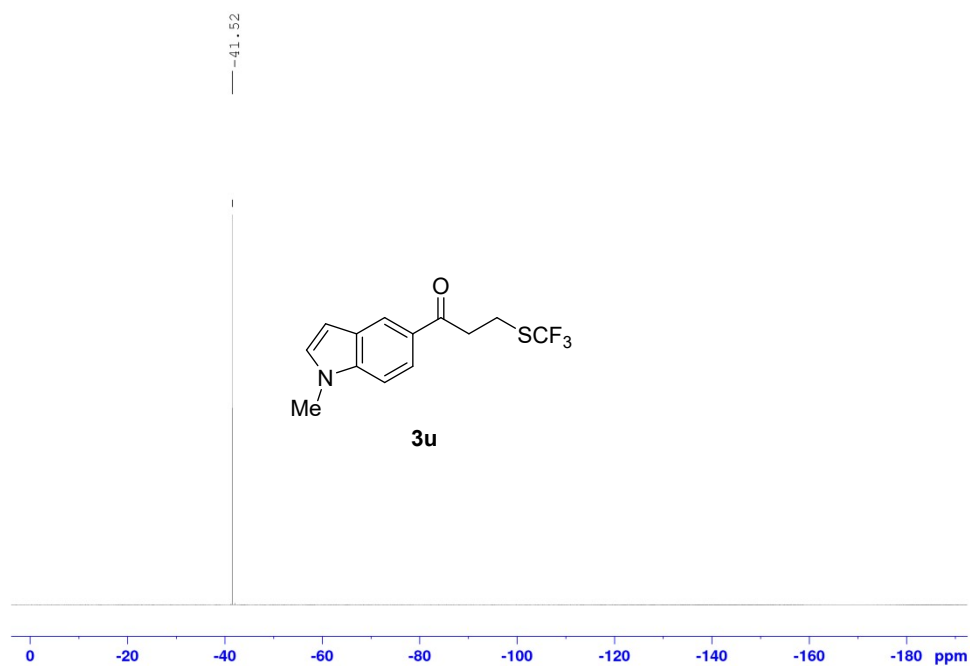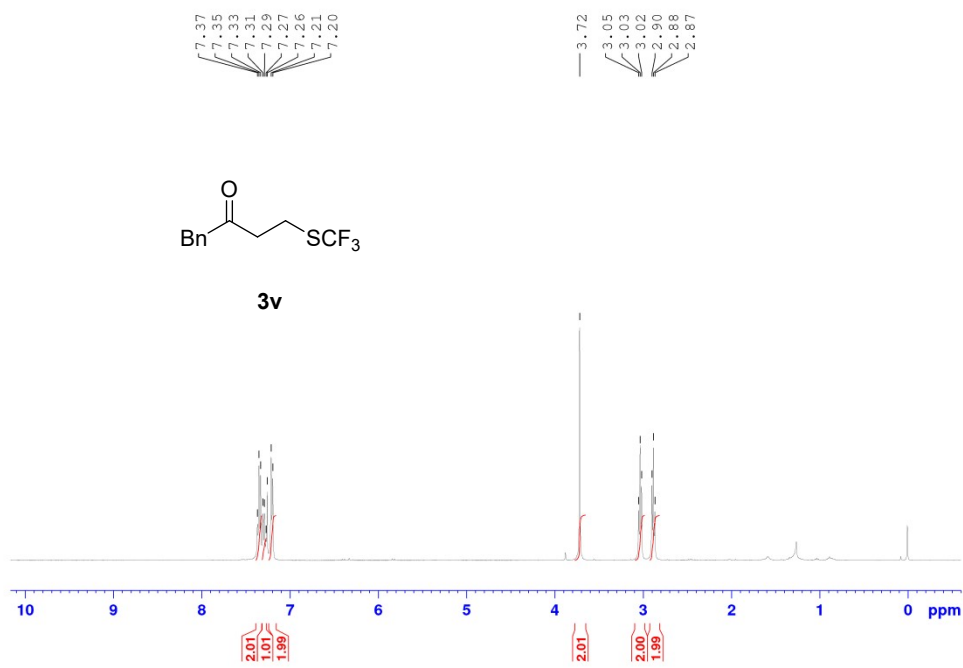

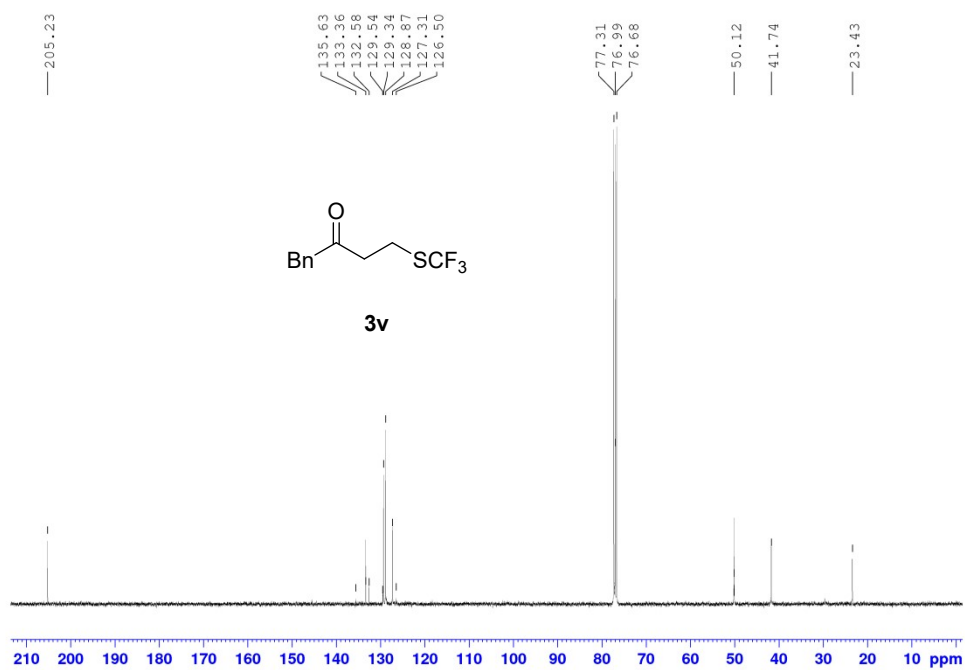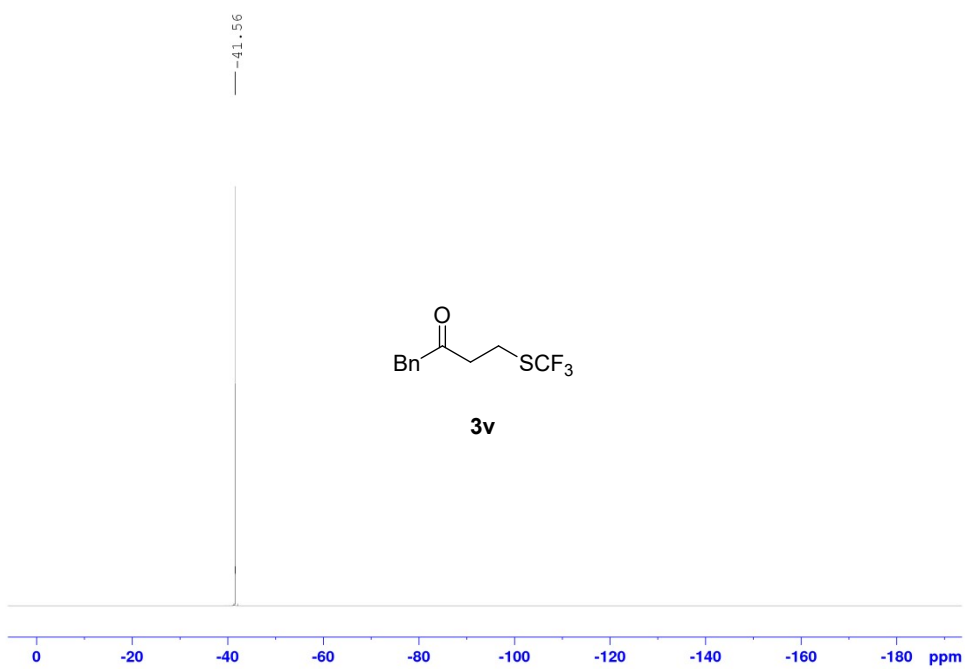



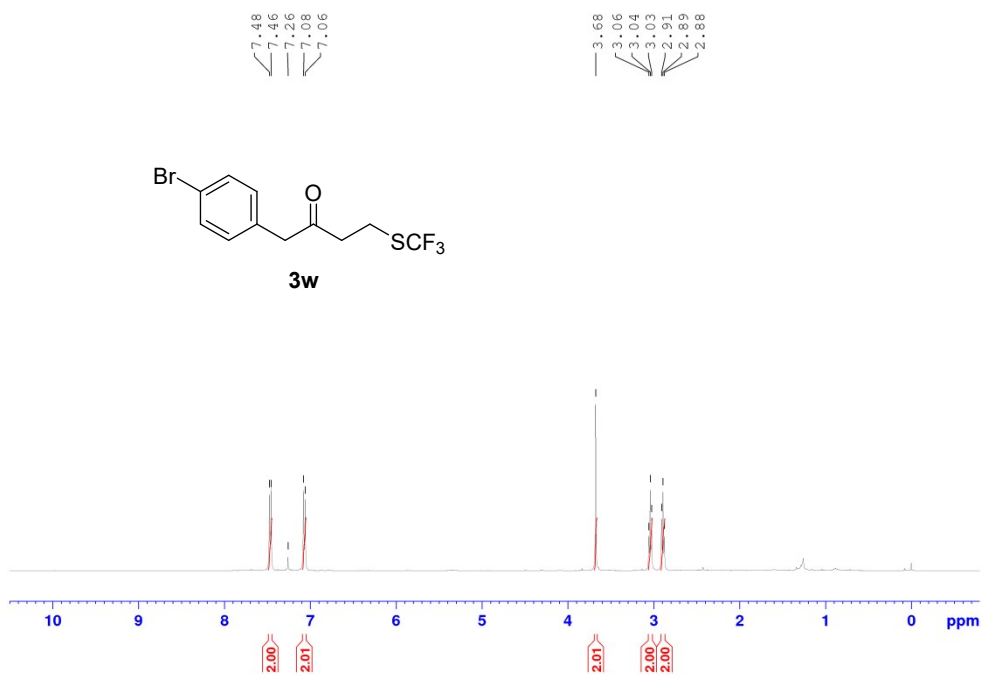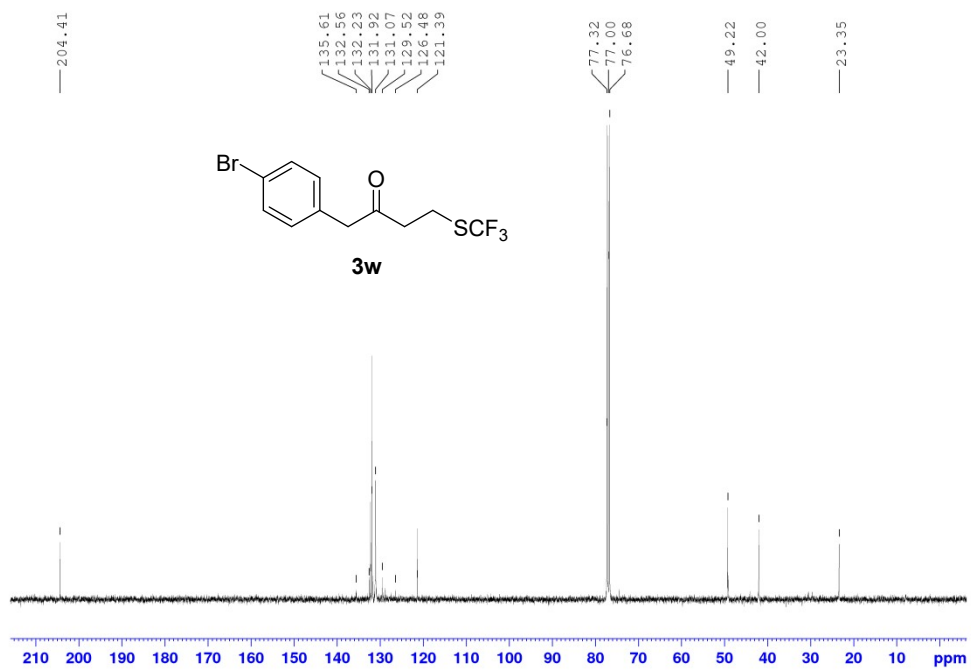

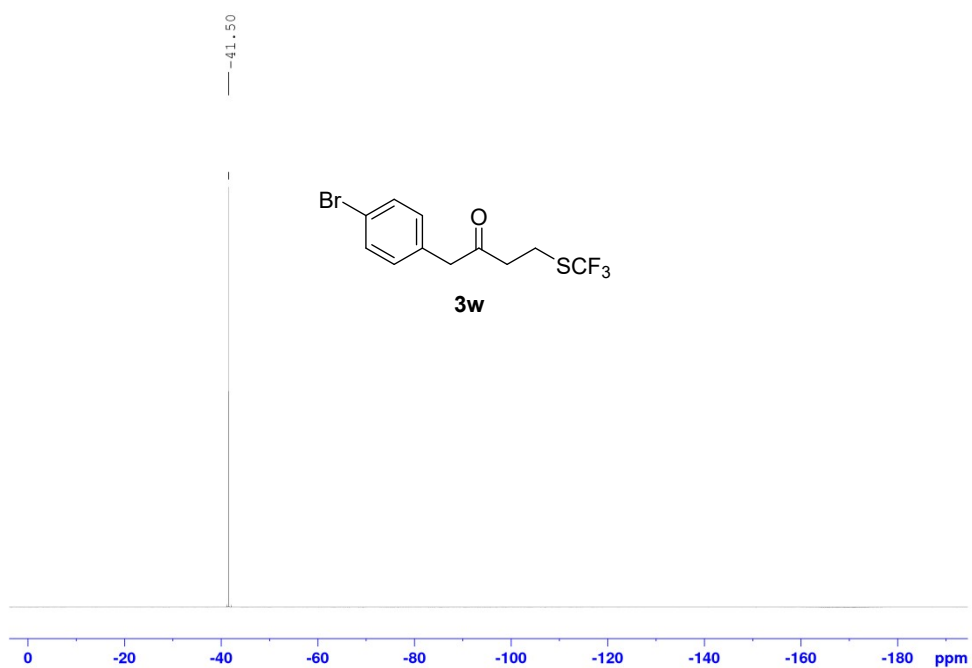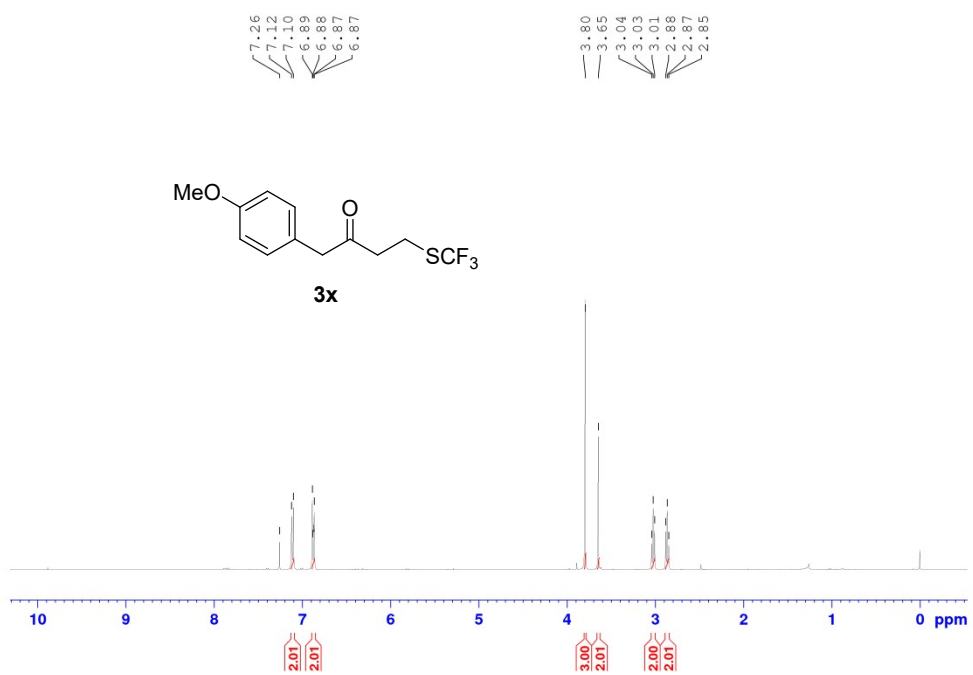

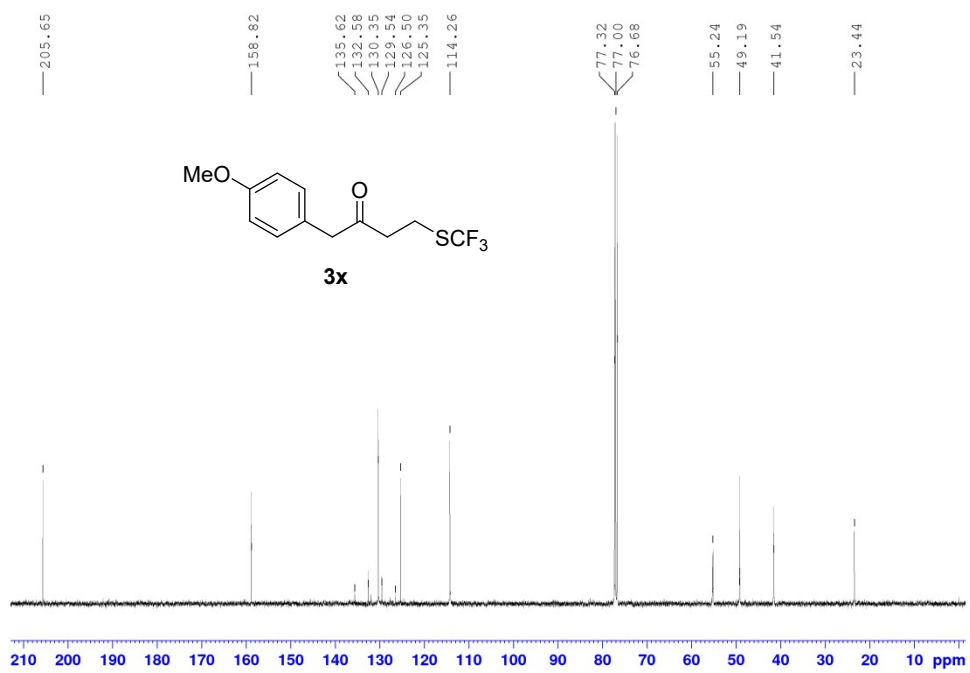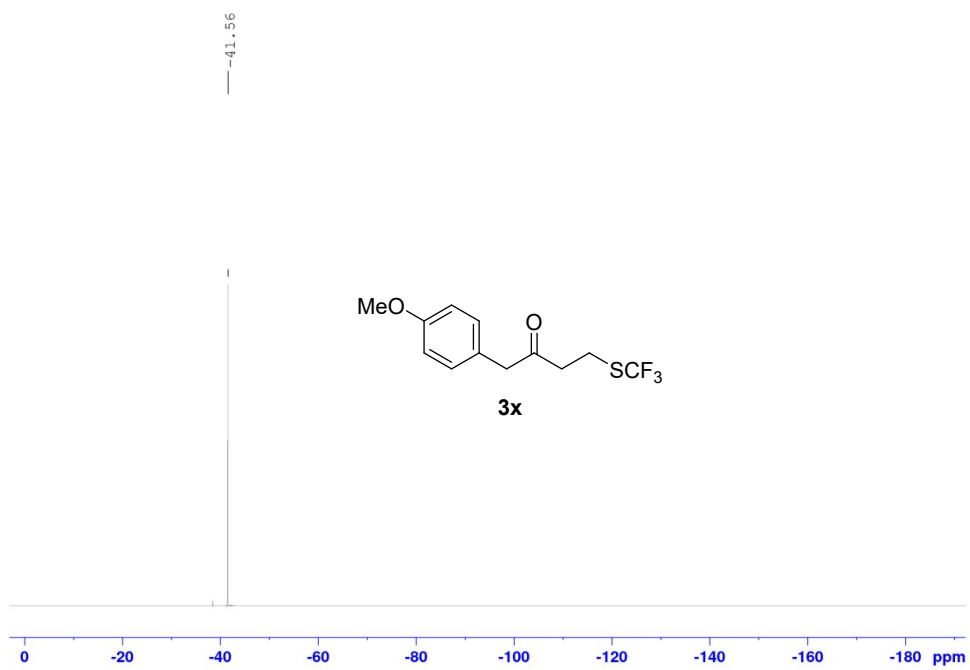

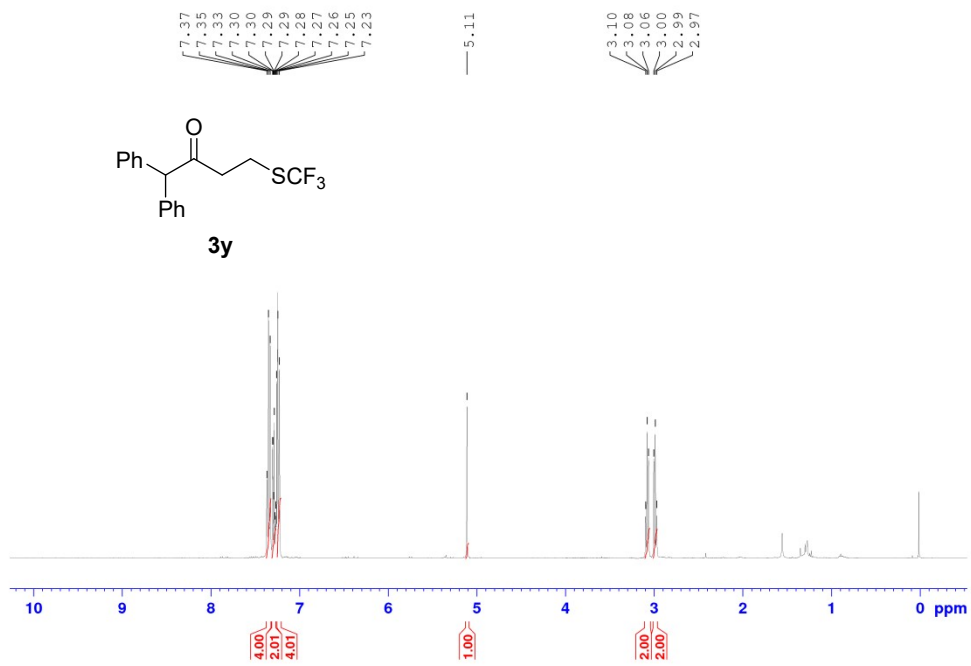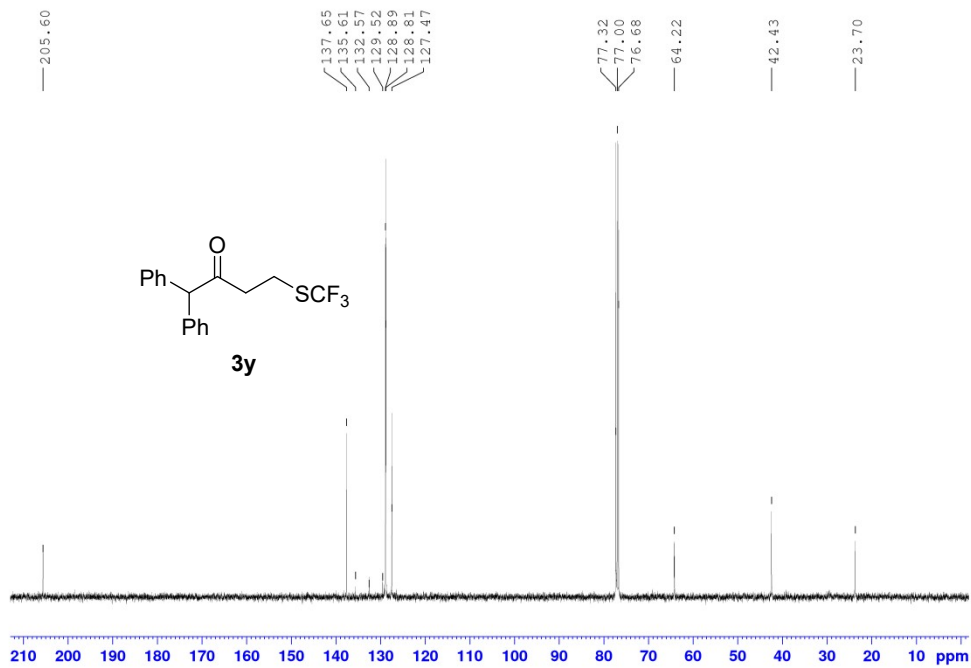

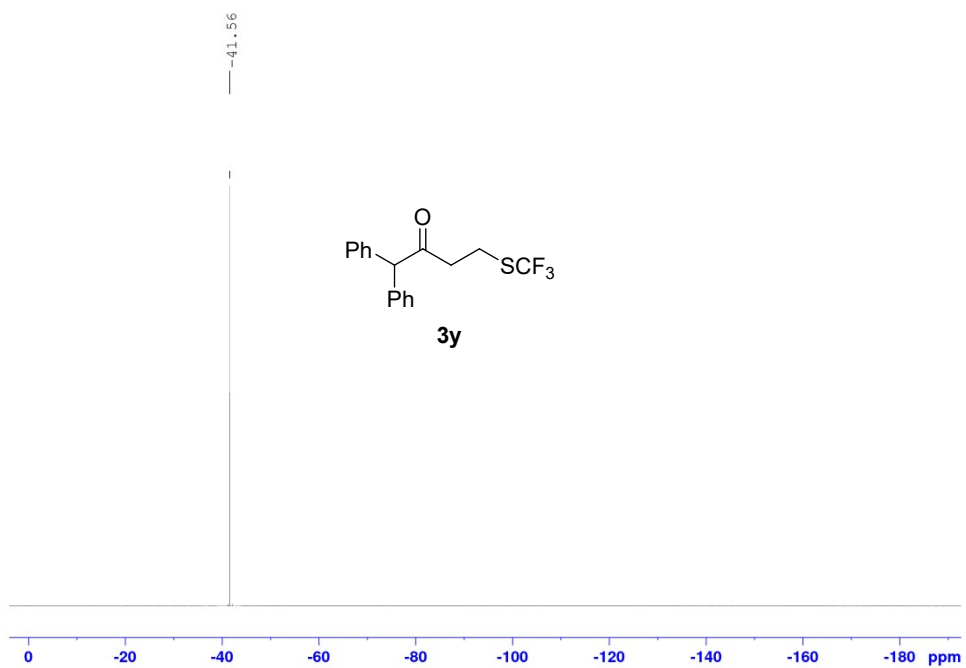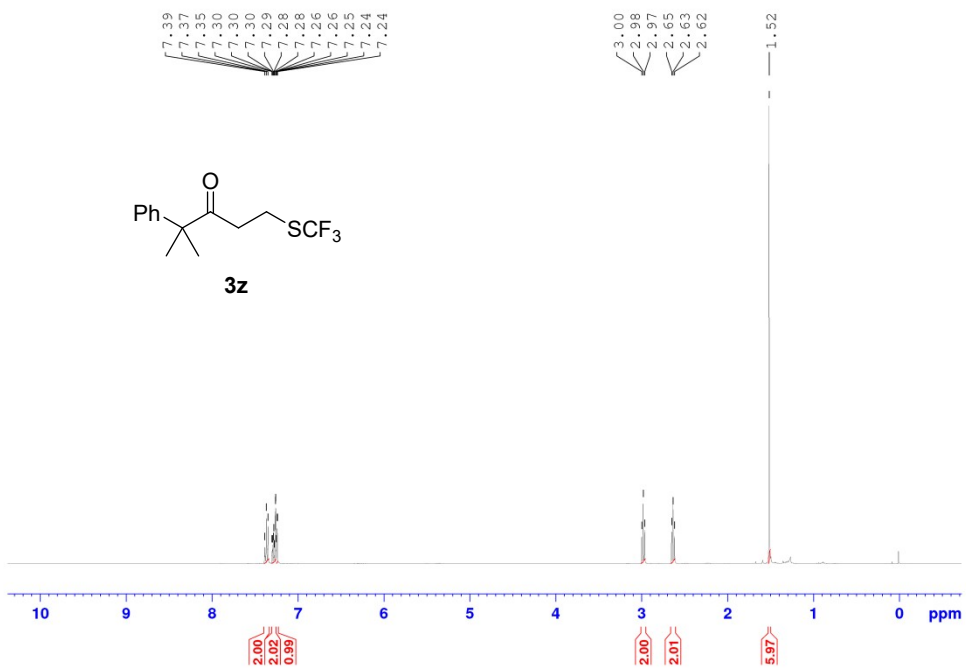

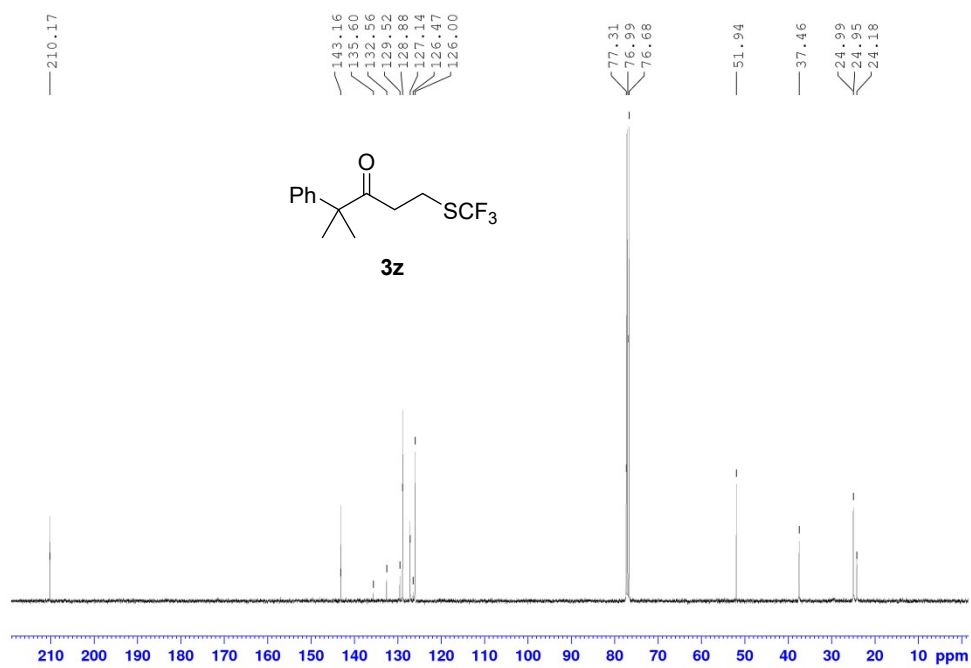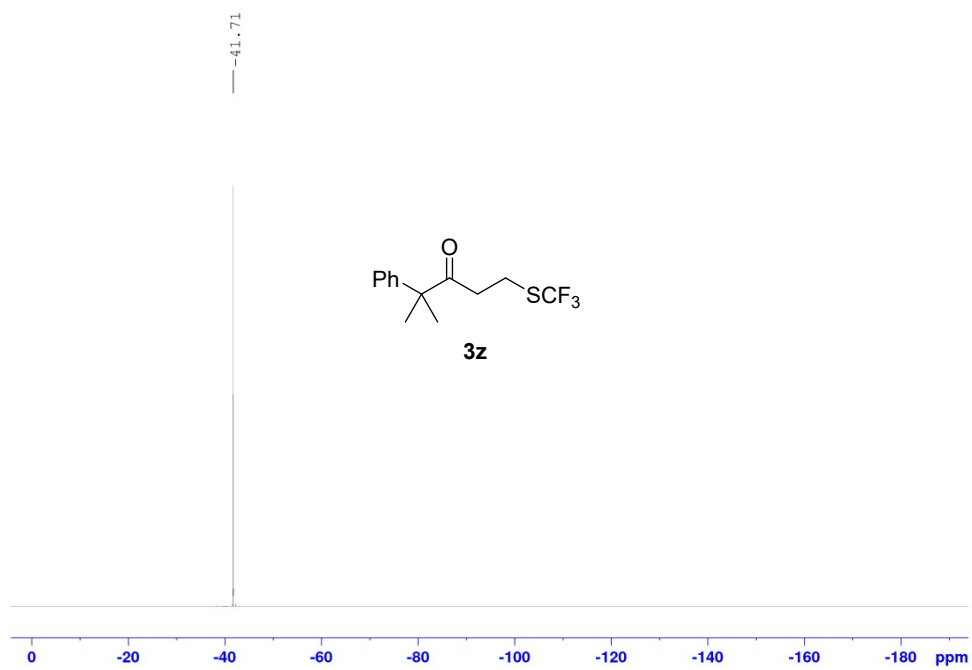

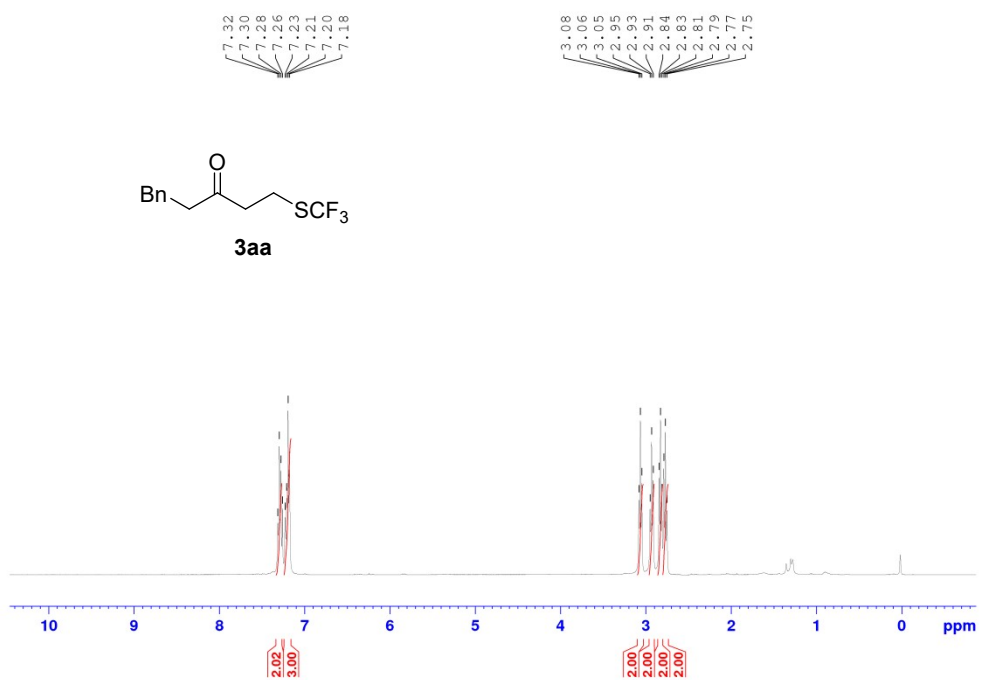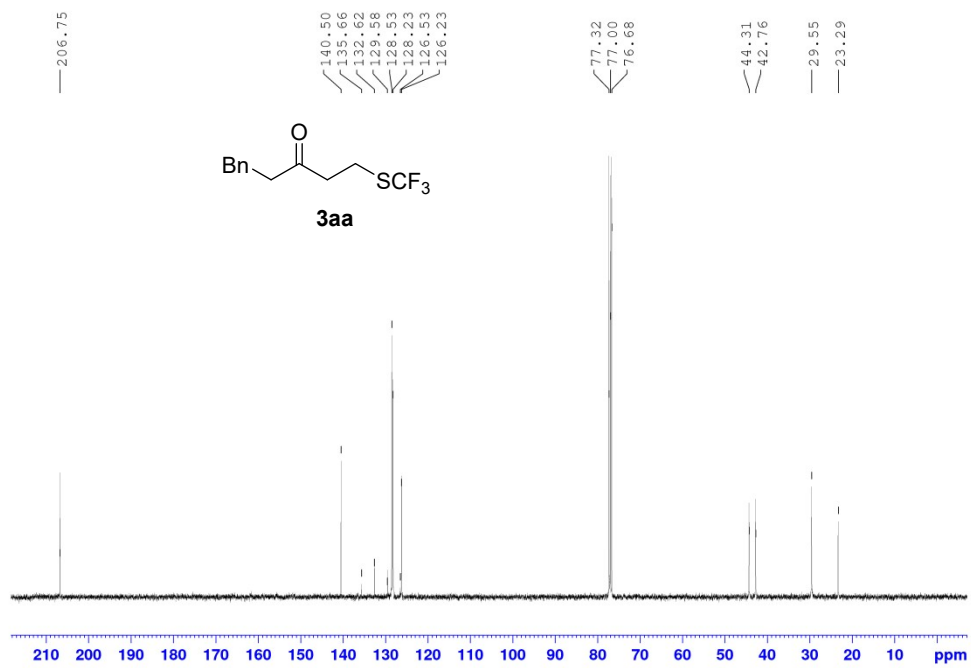

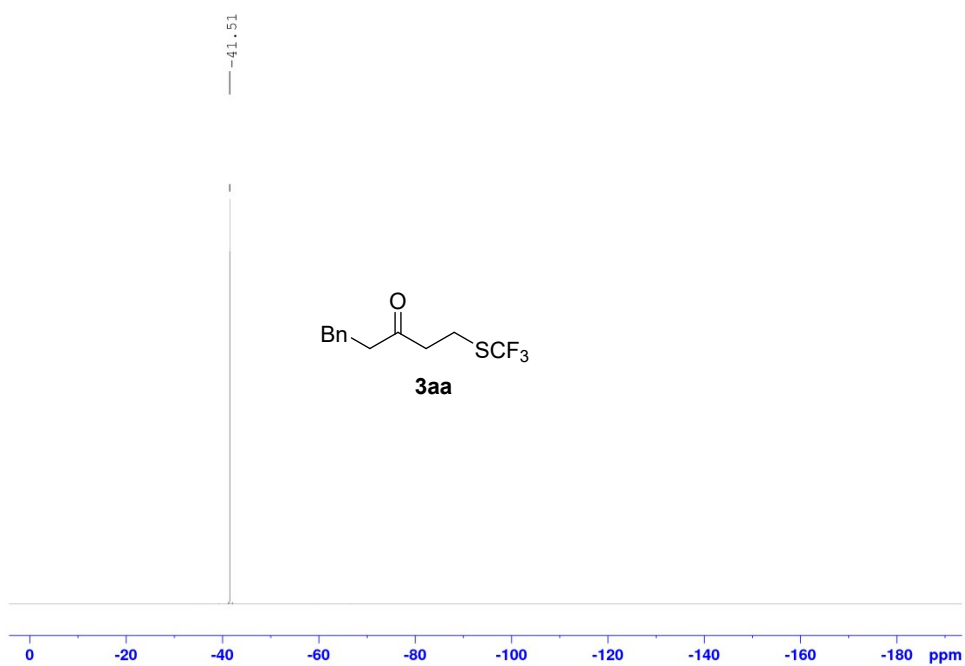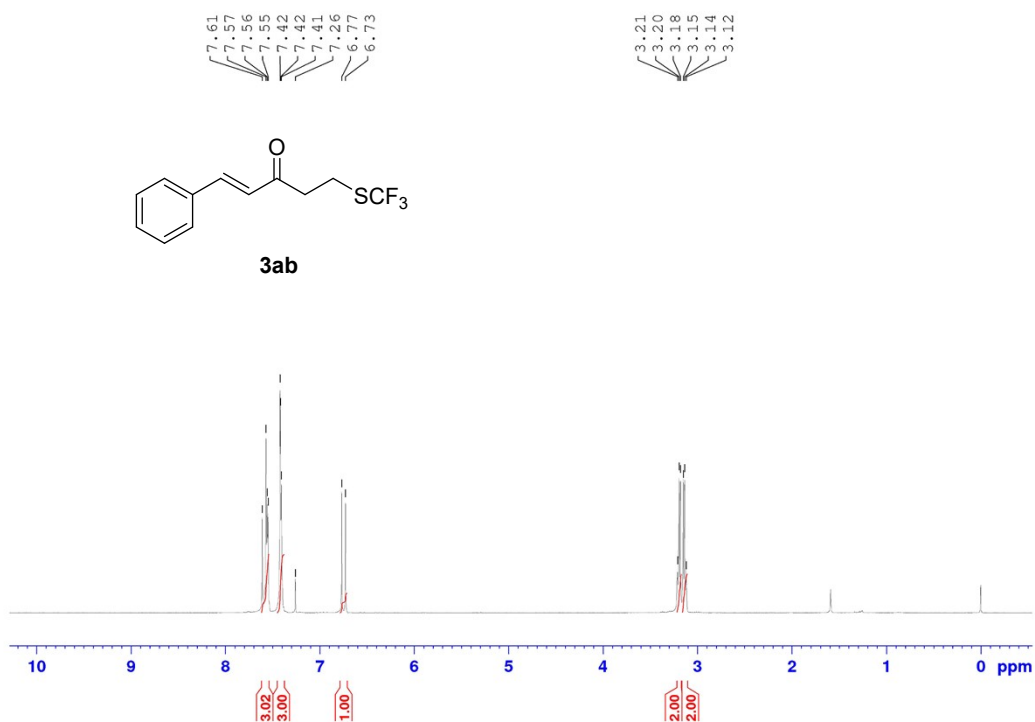



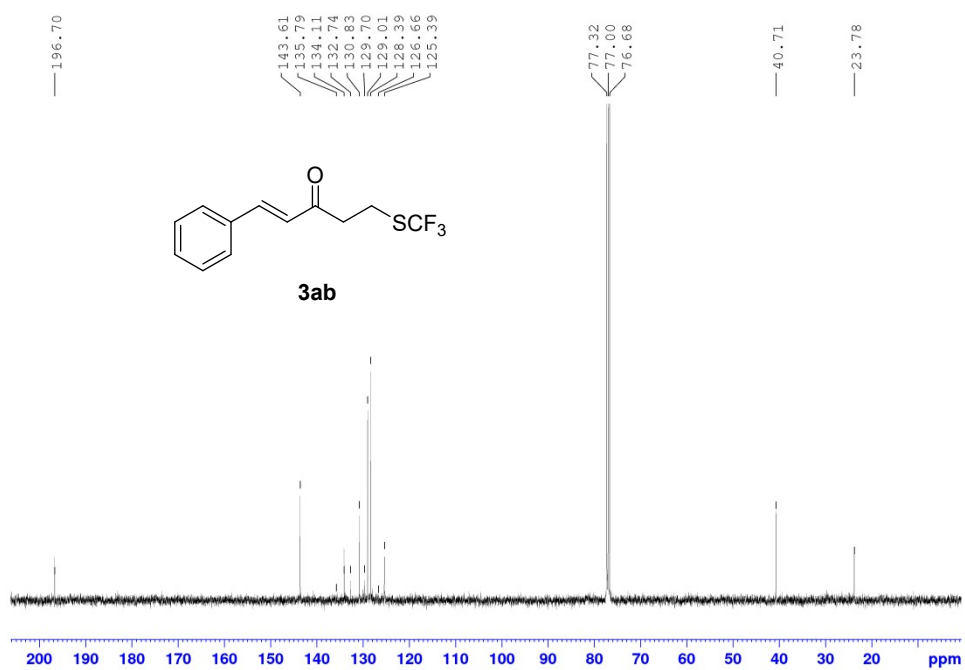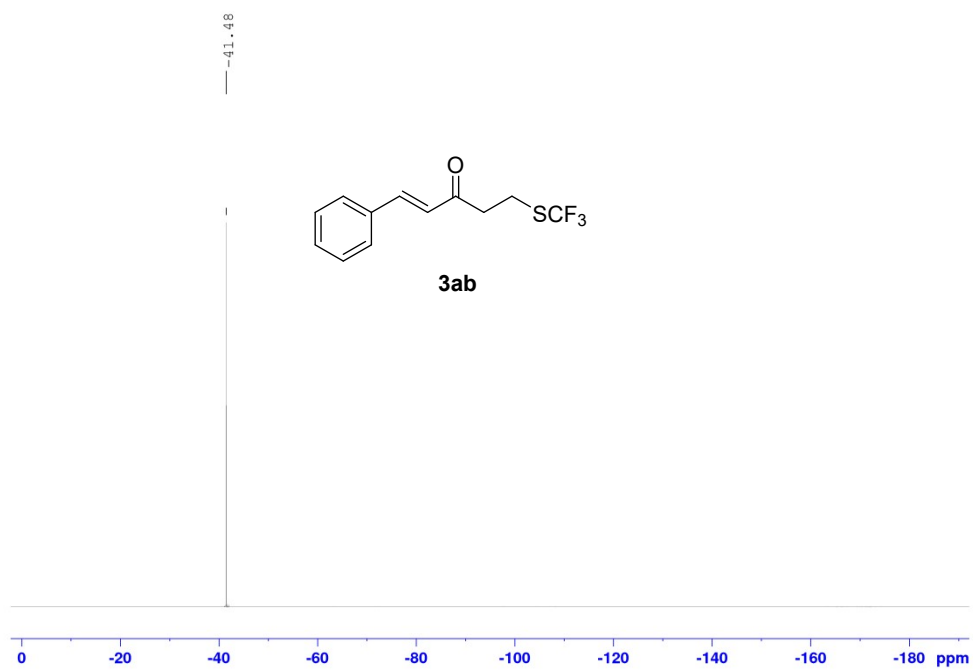

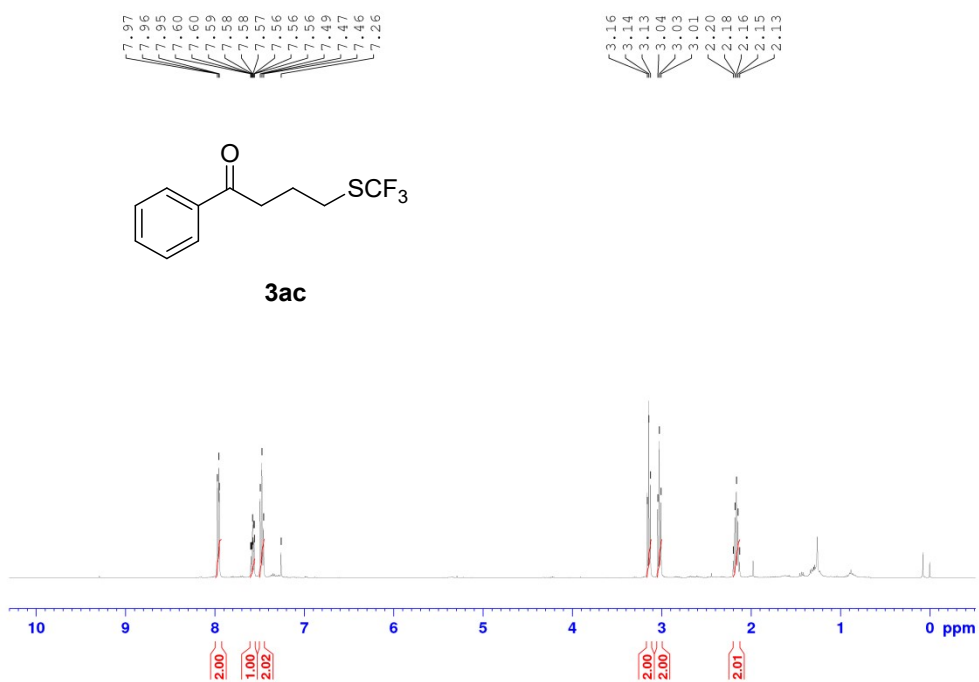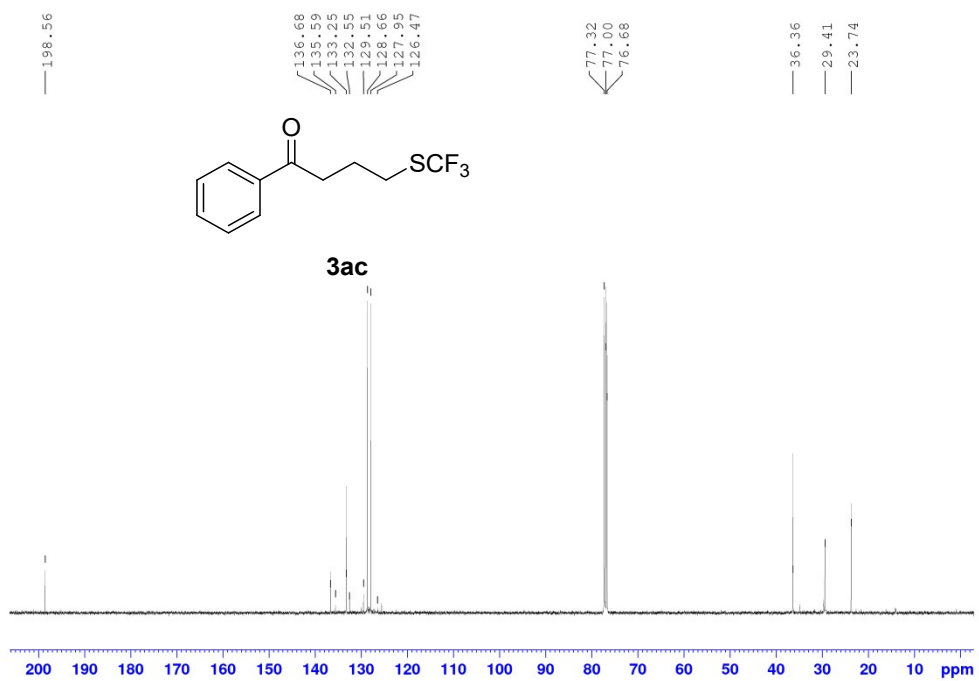

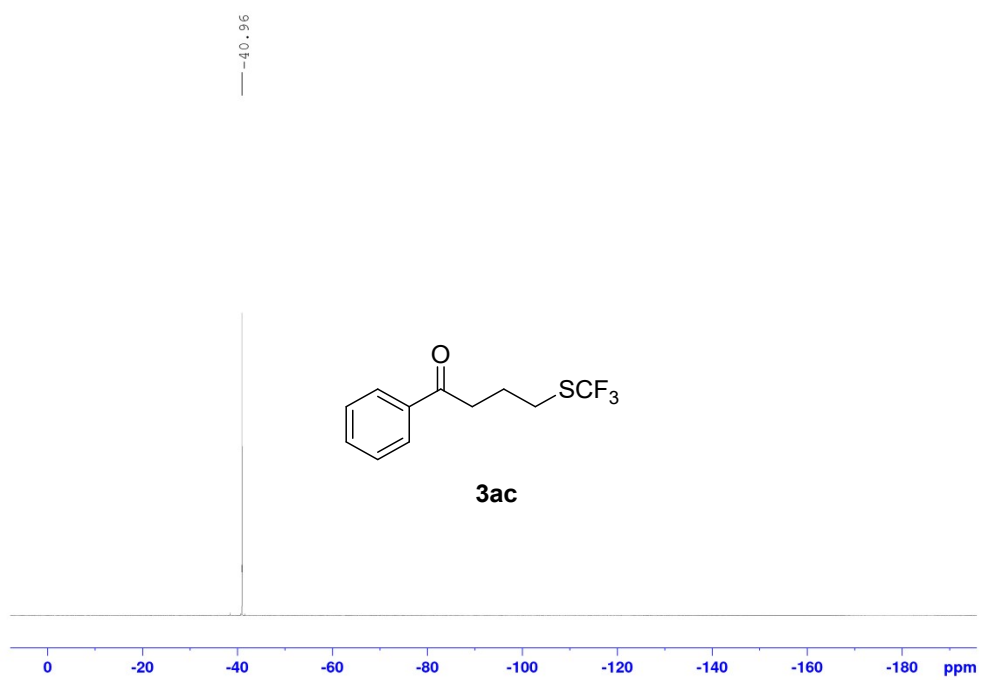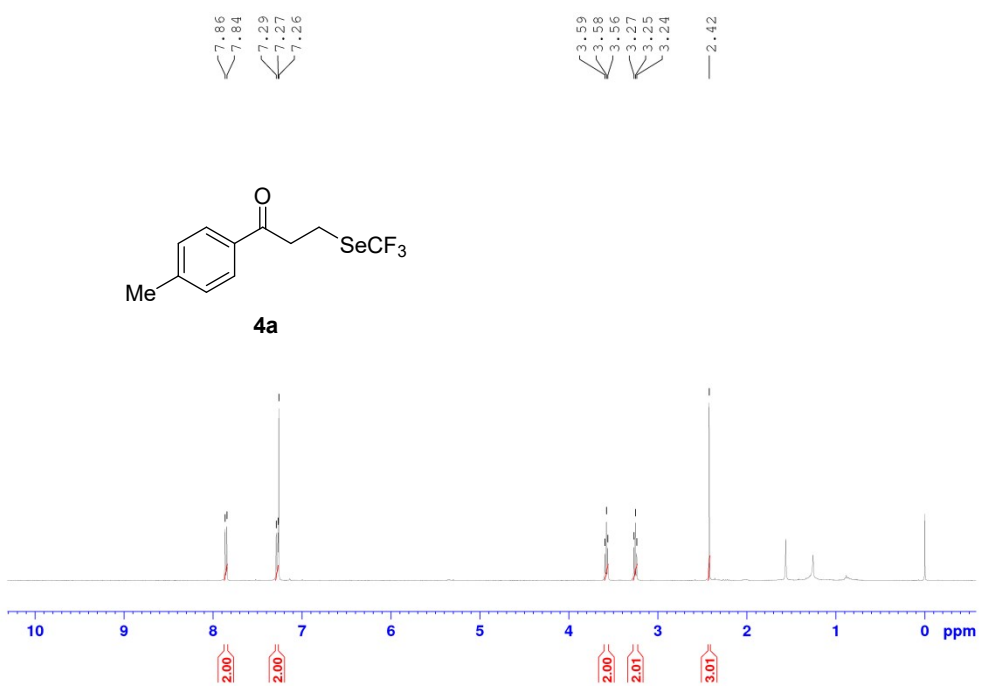

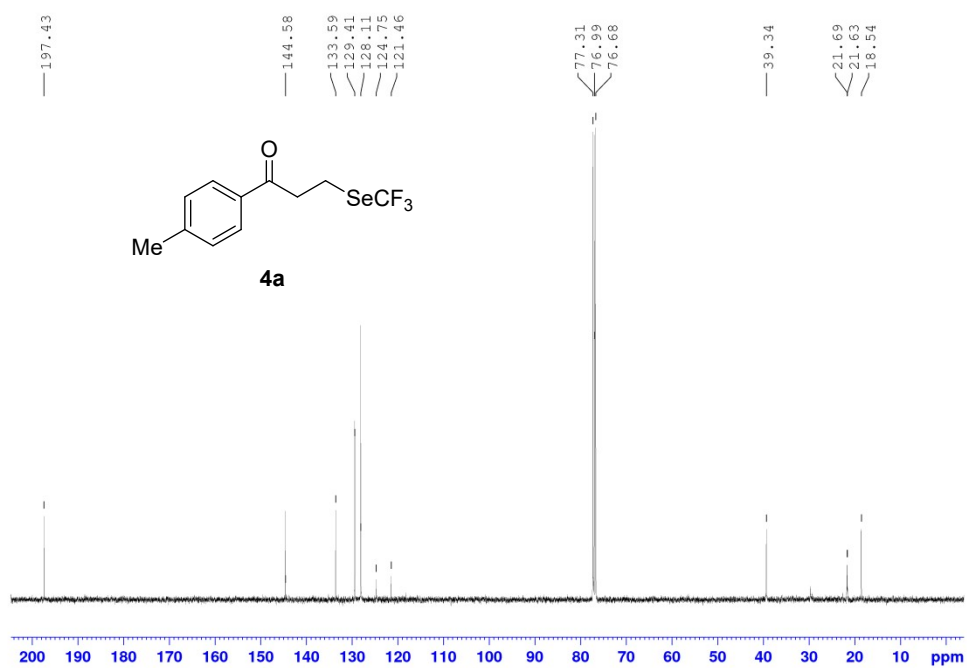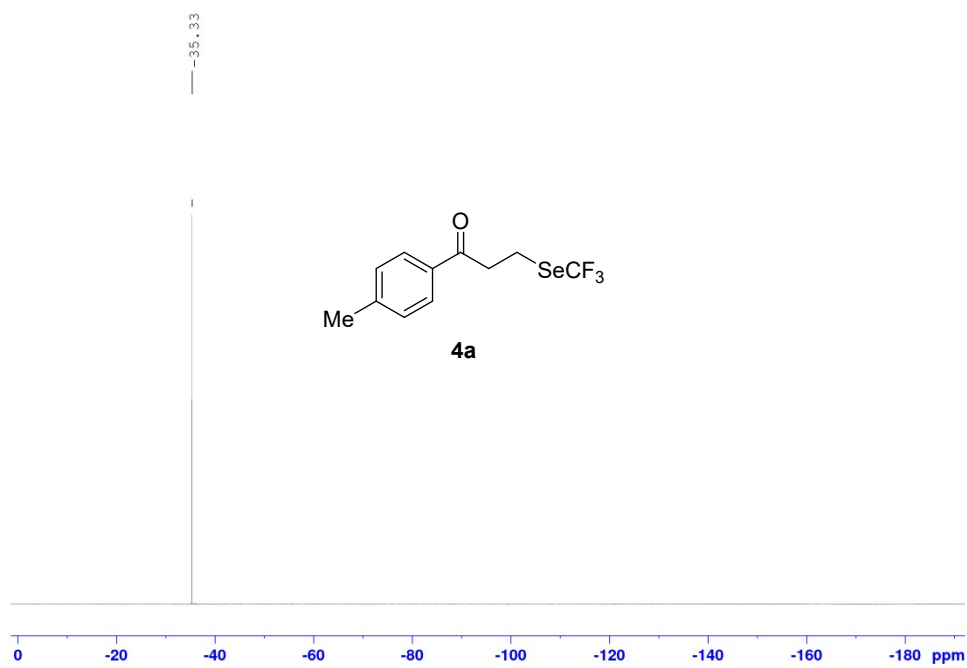

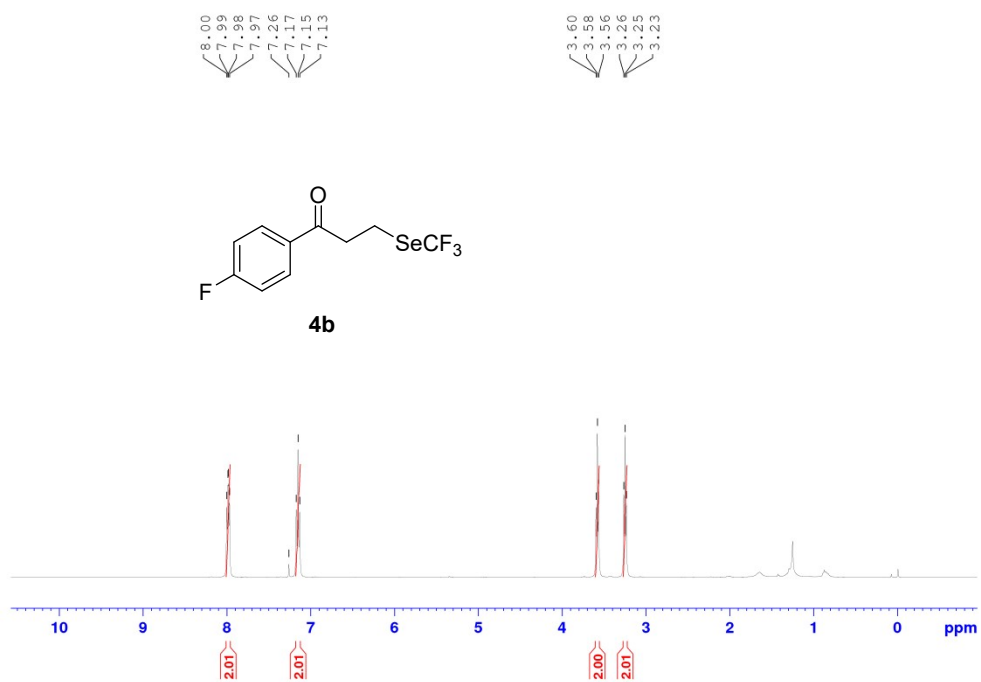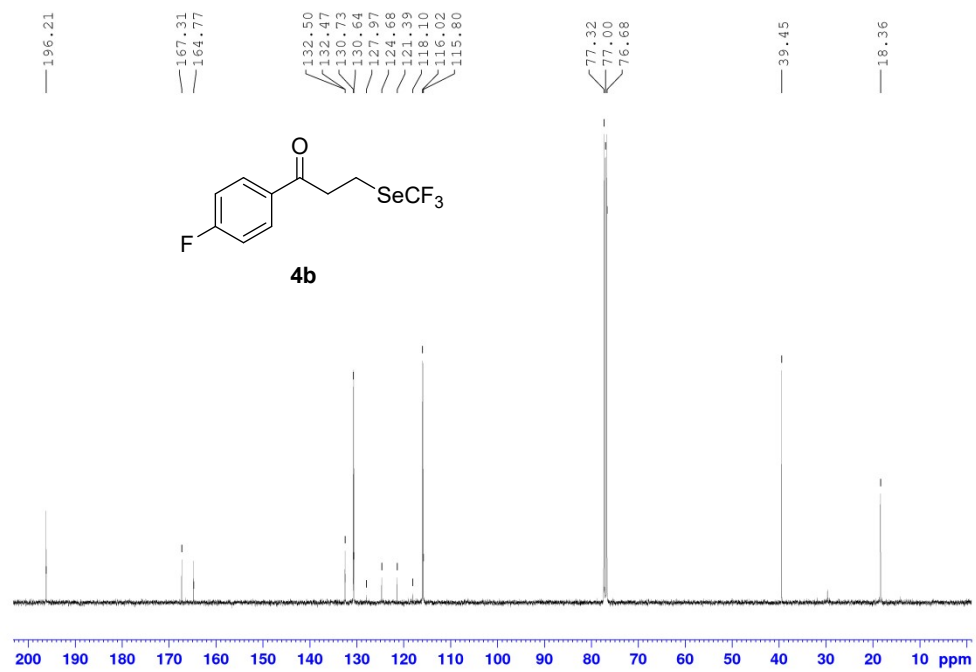

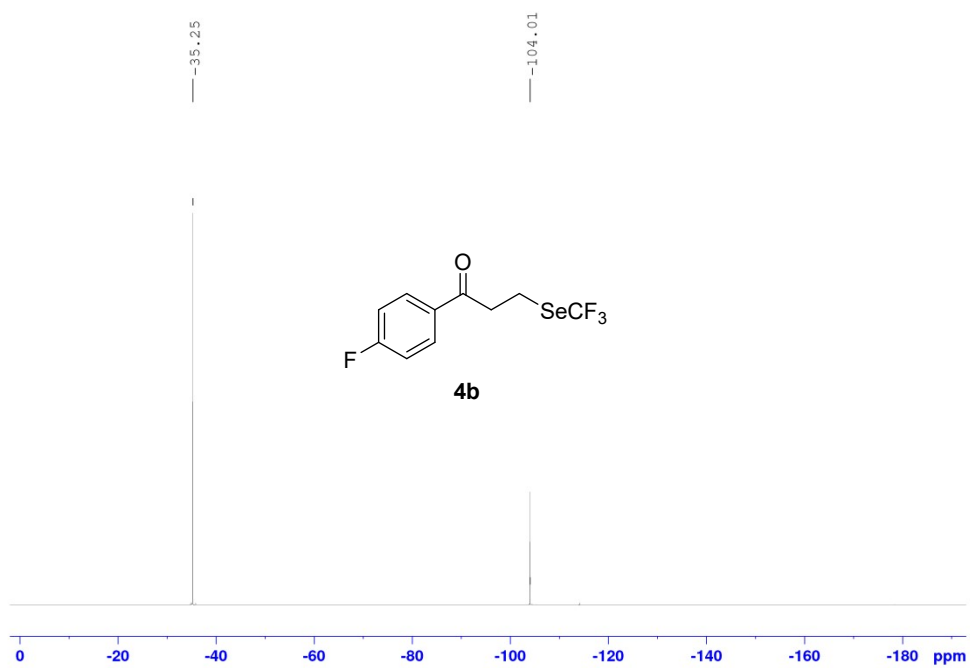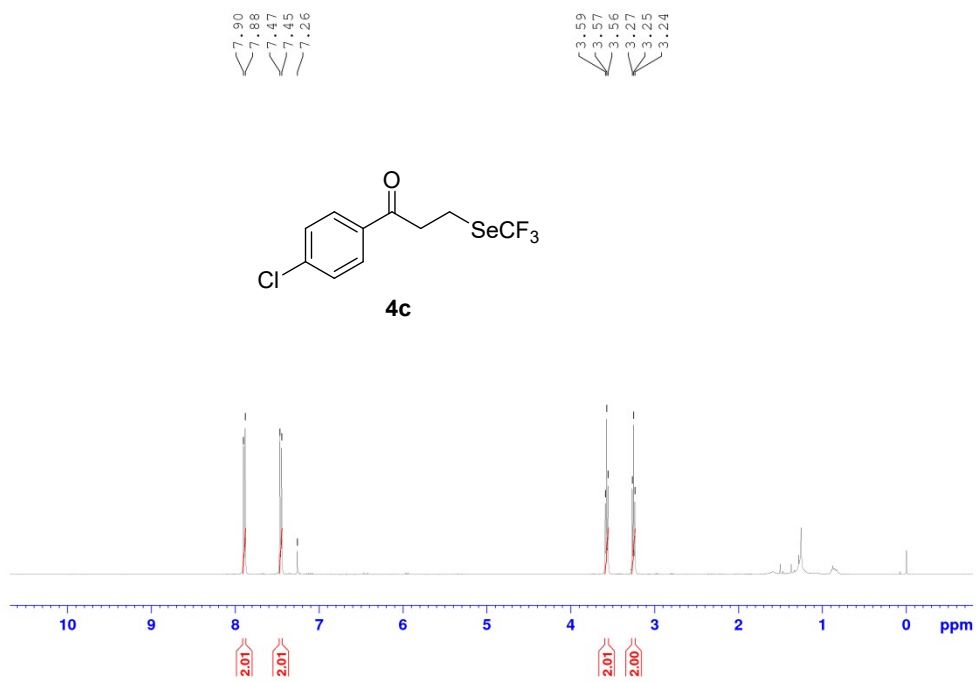

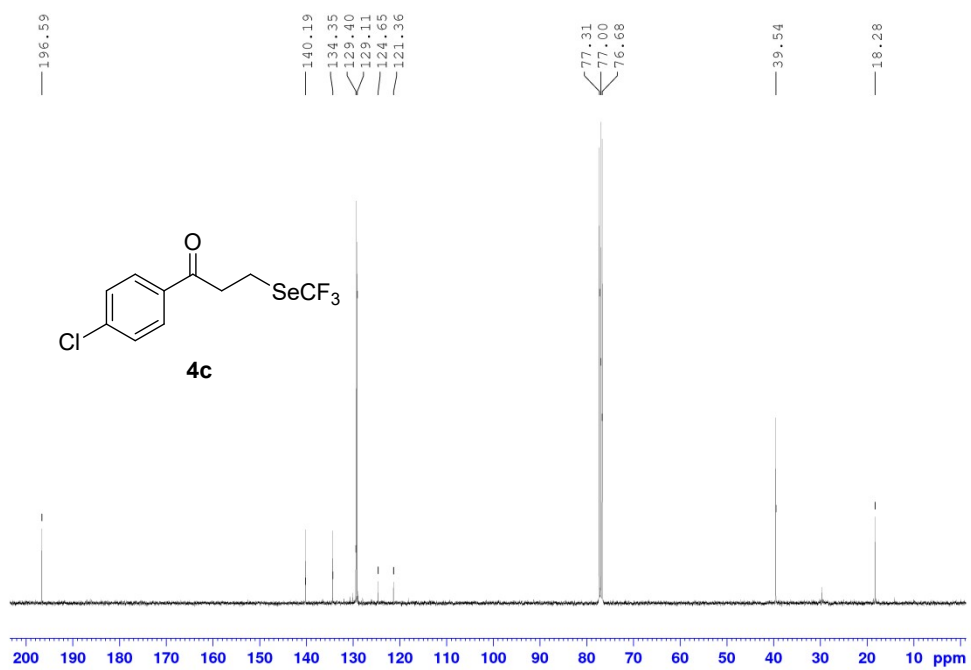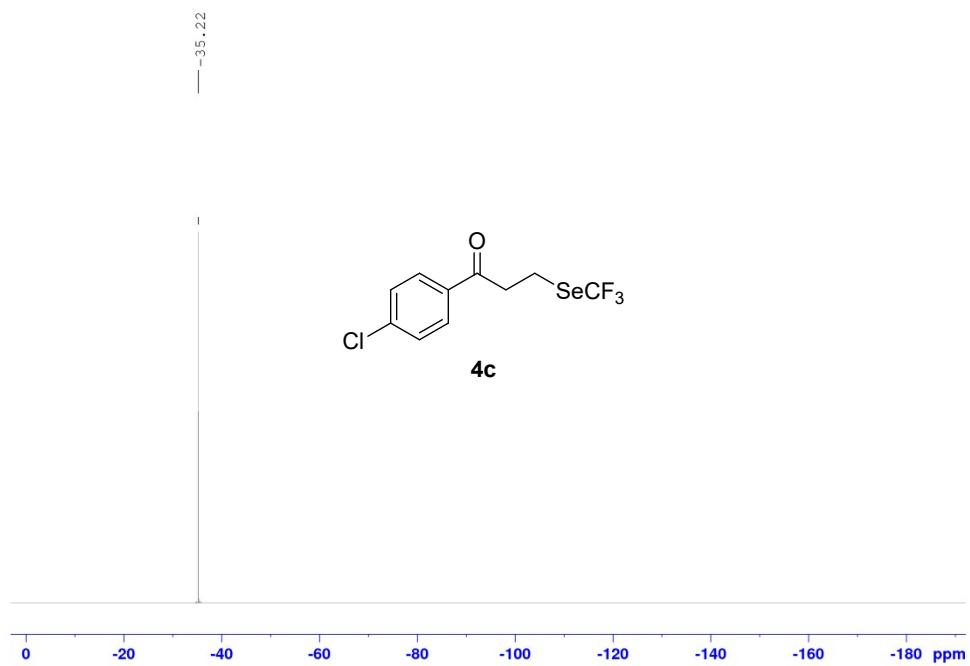

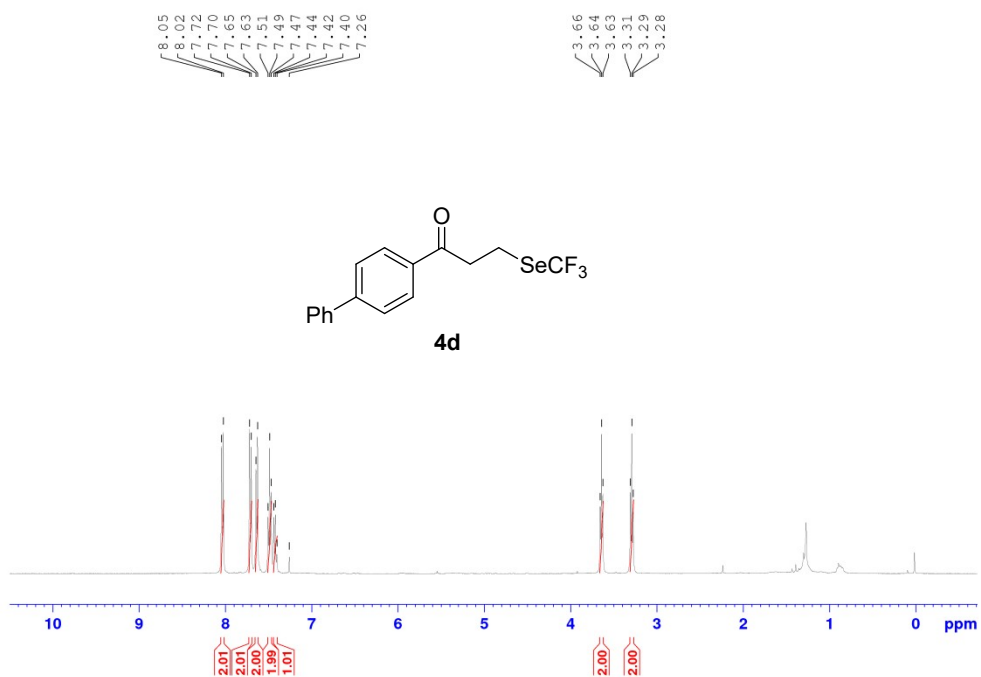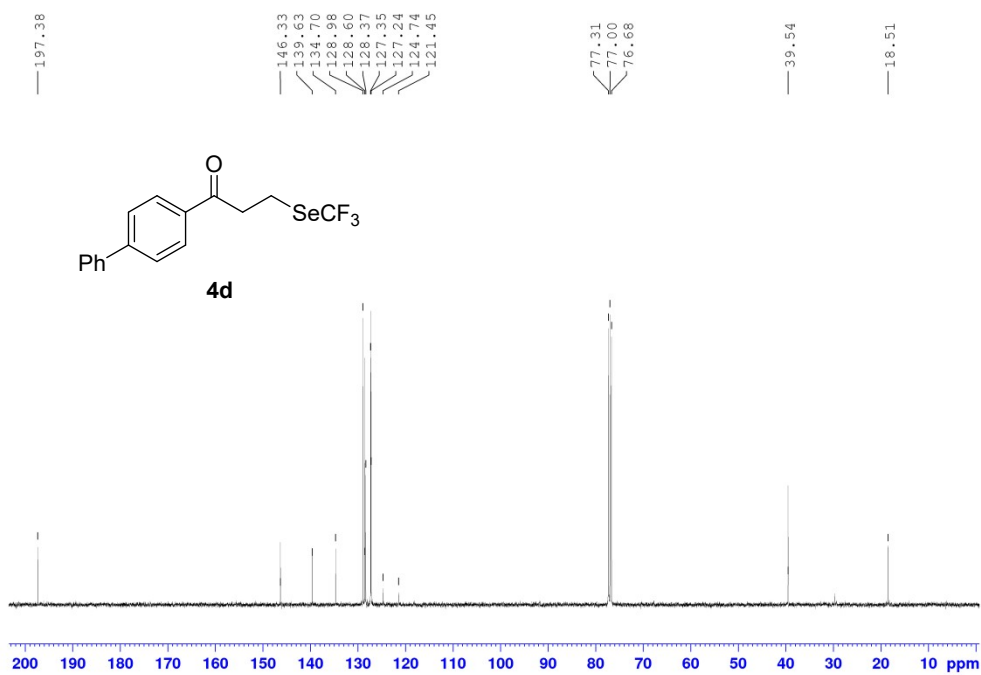



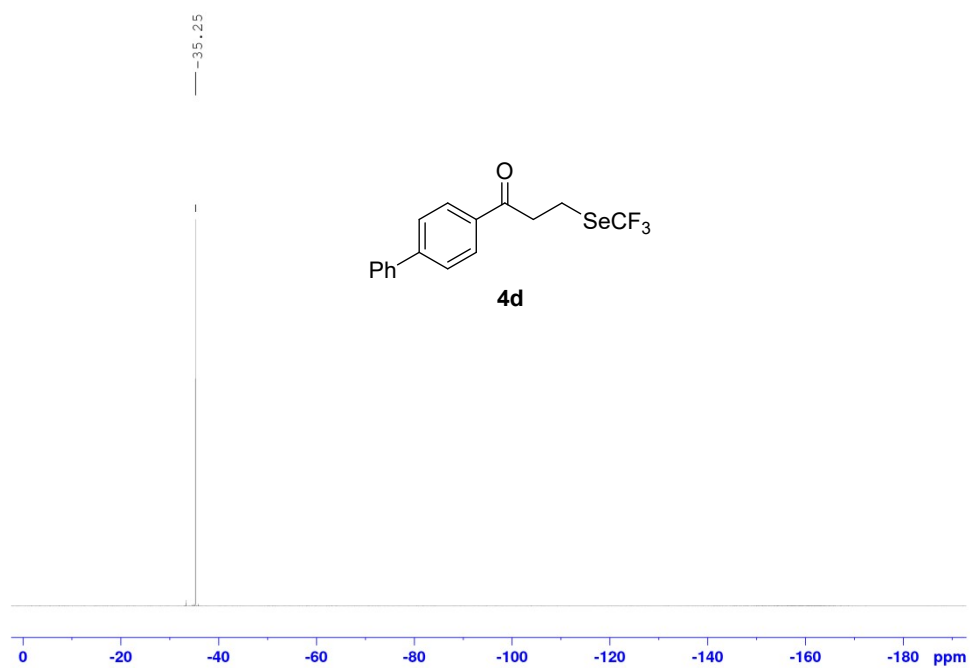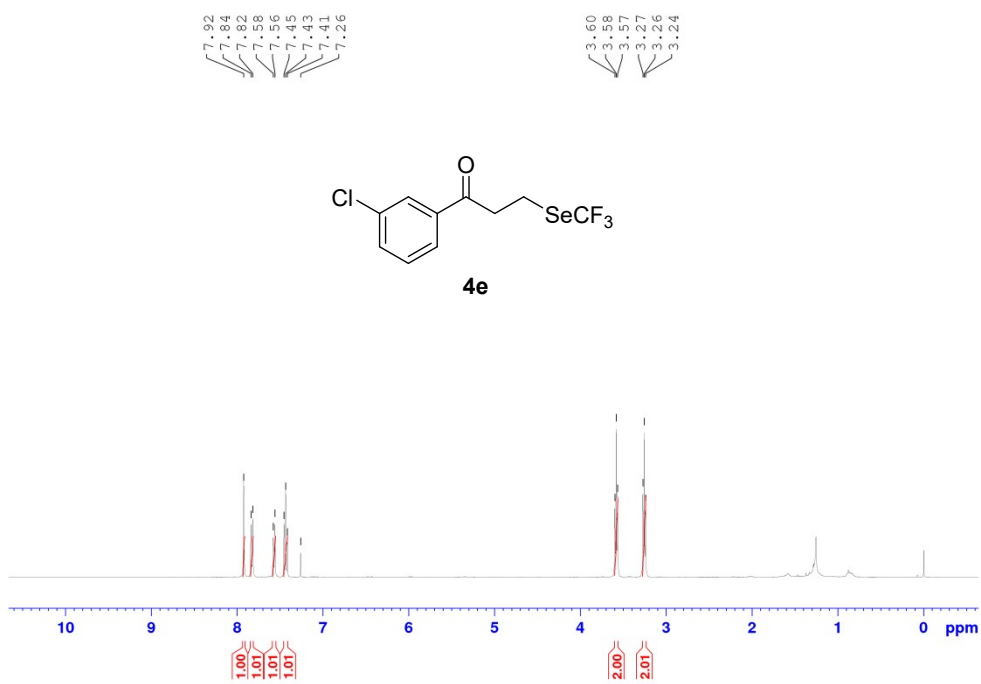

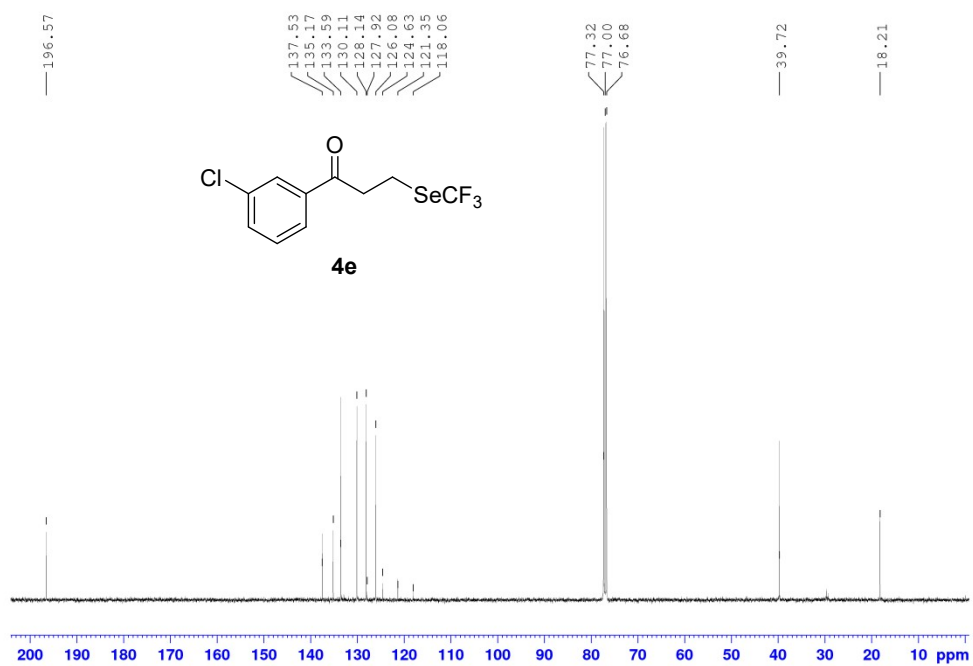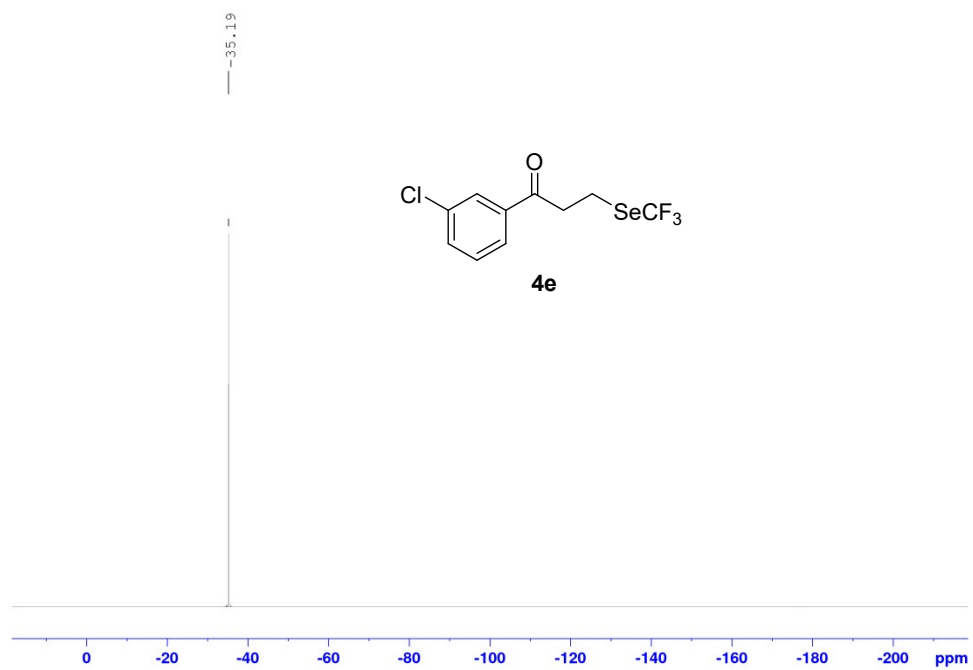

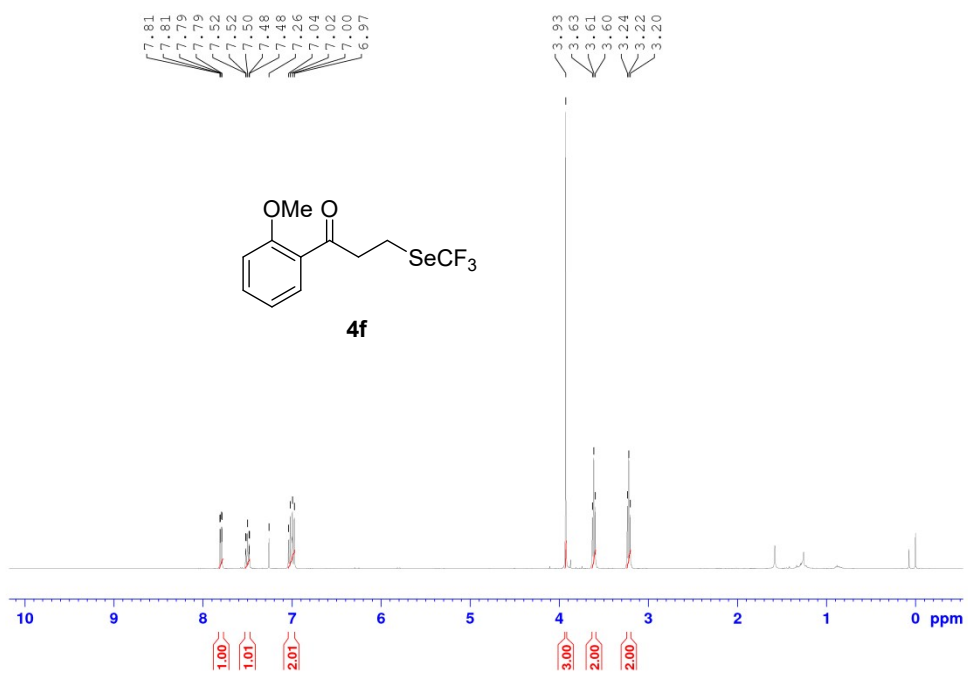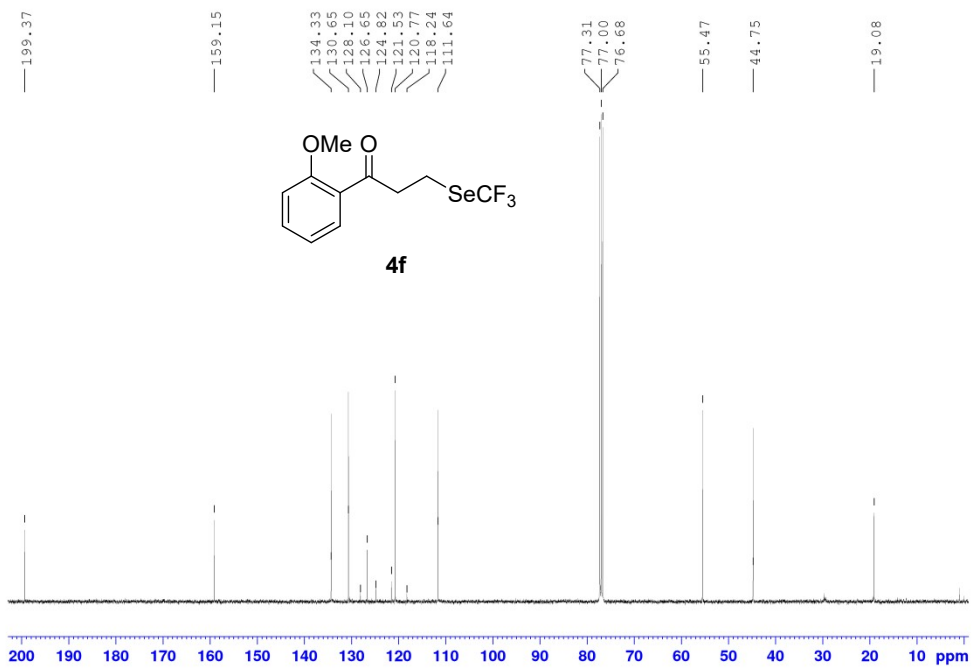

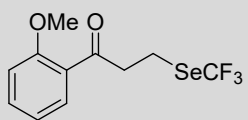

4f

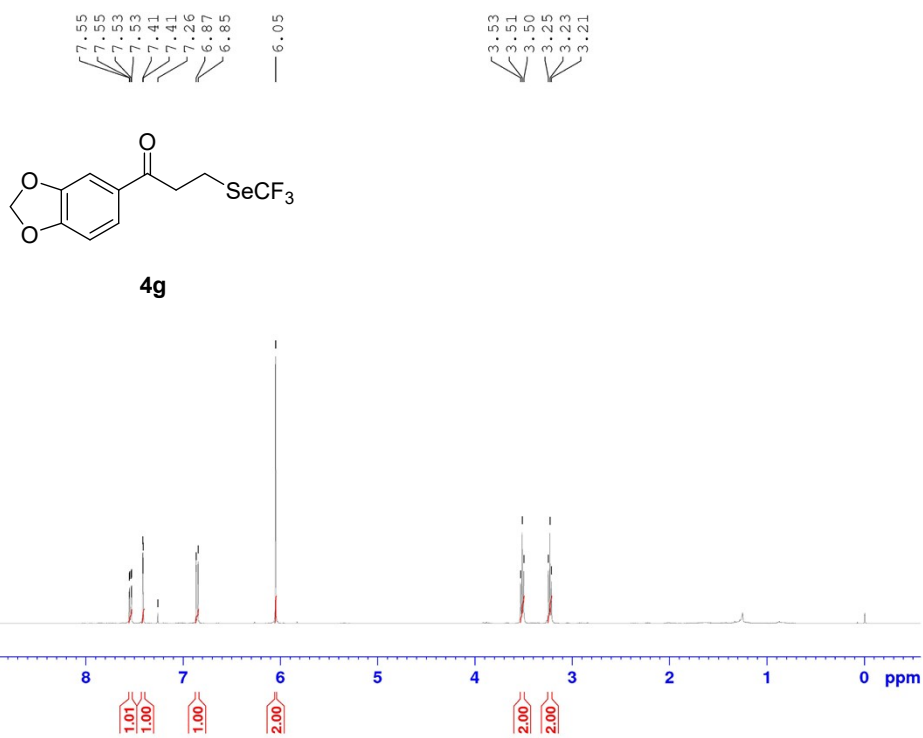

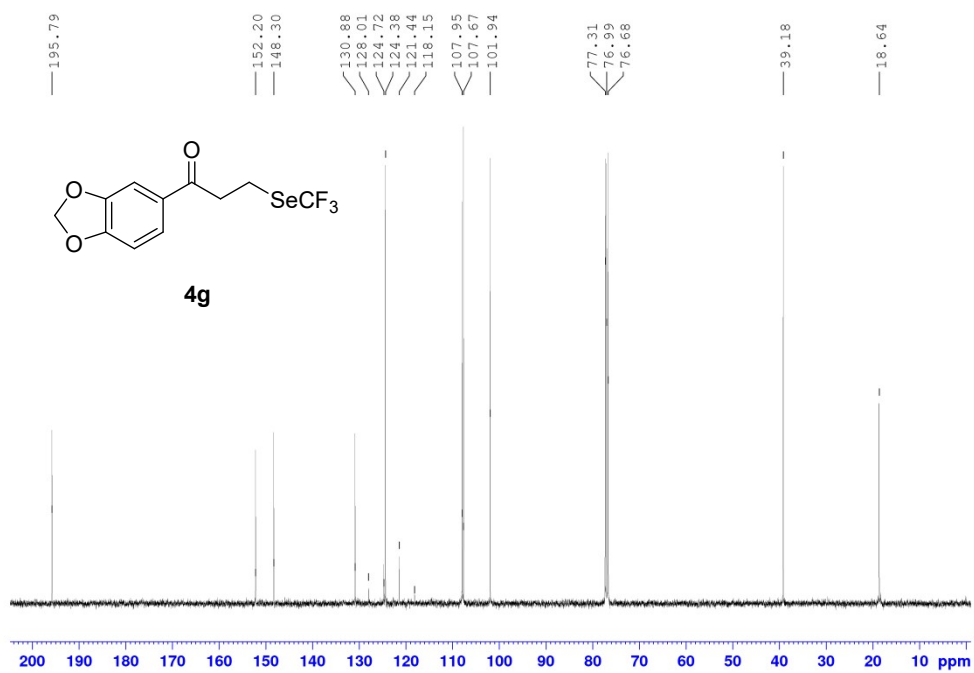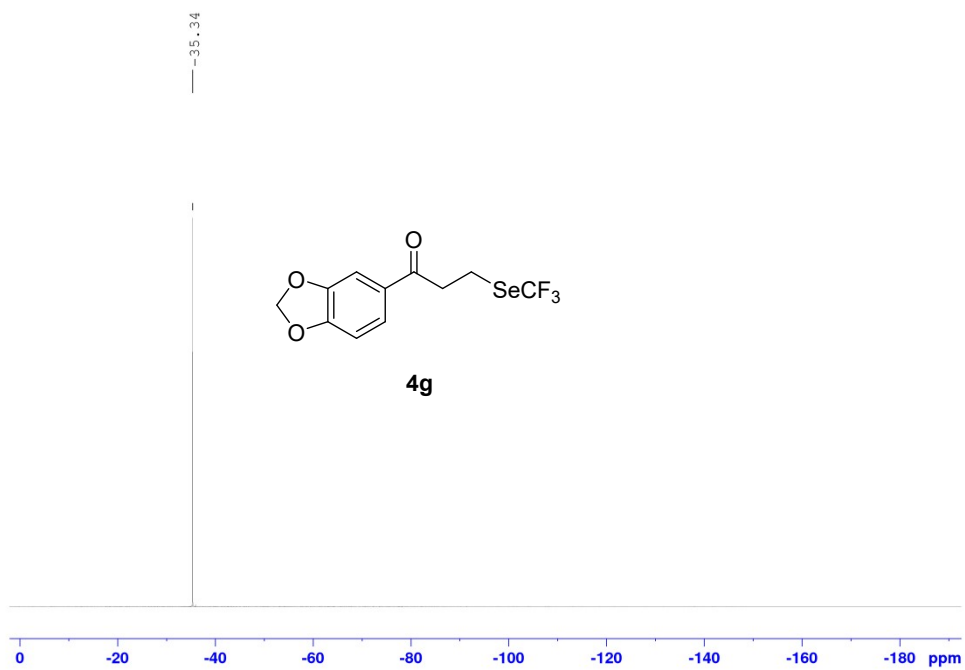

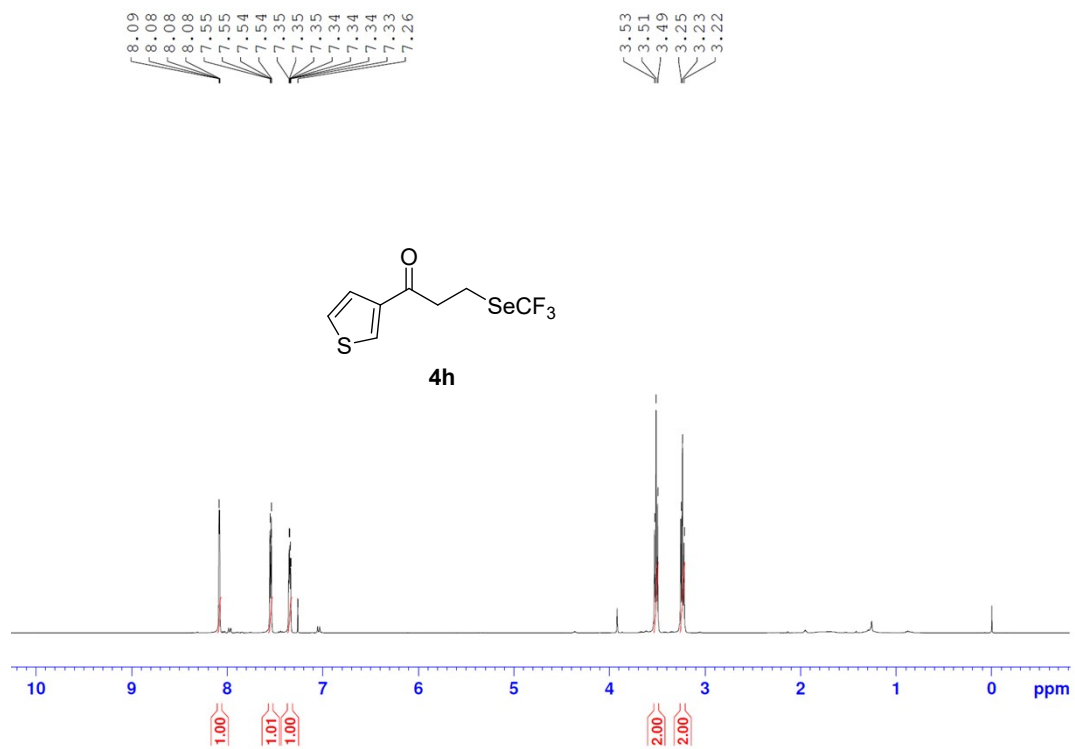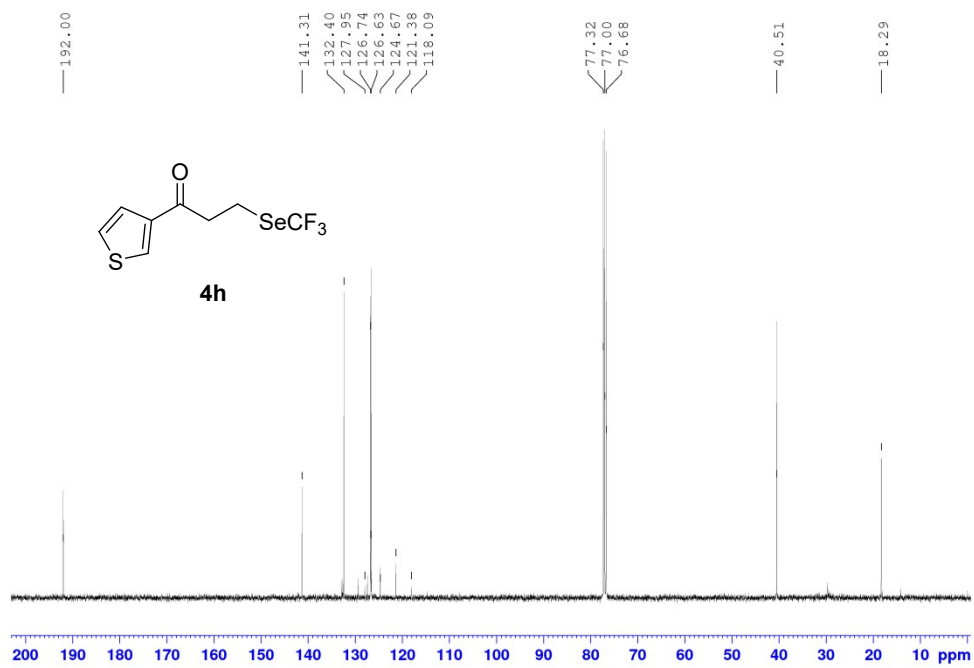



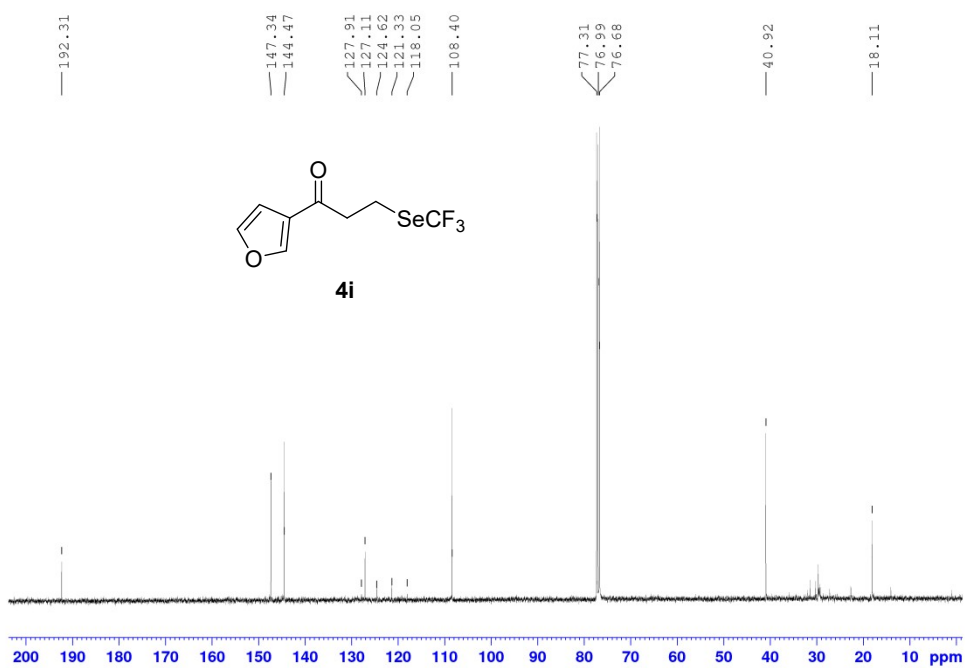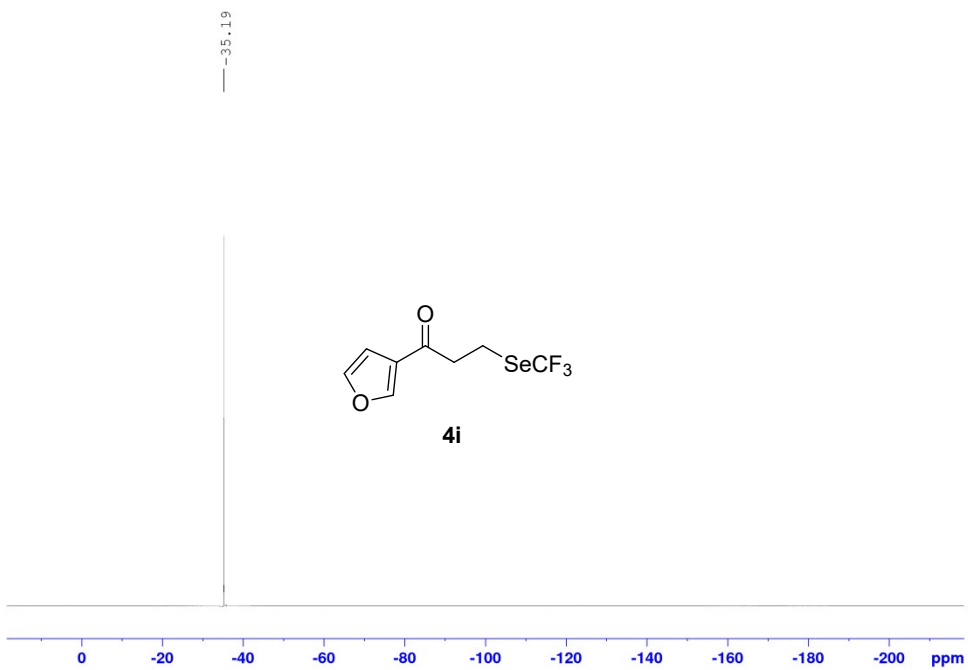



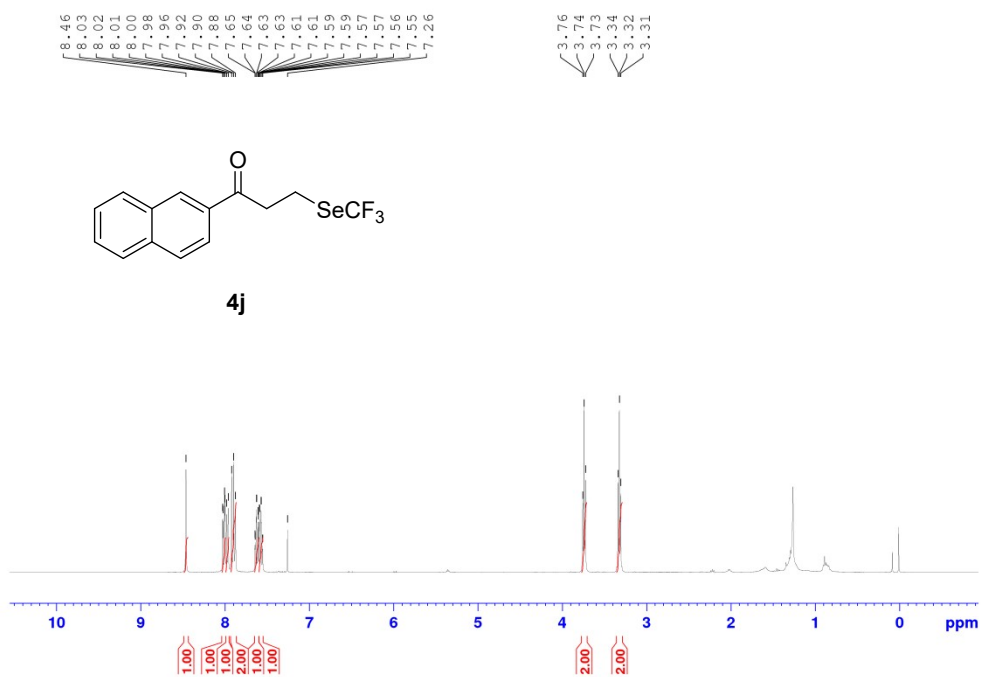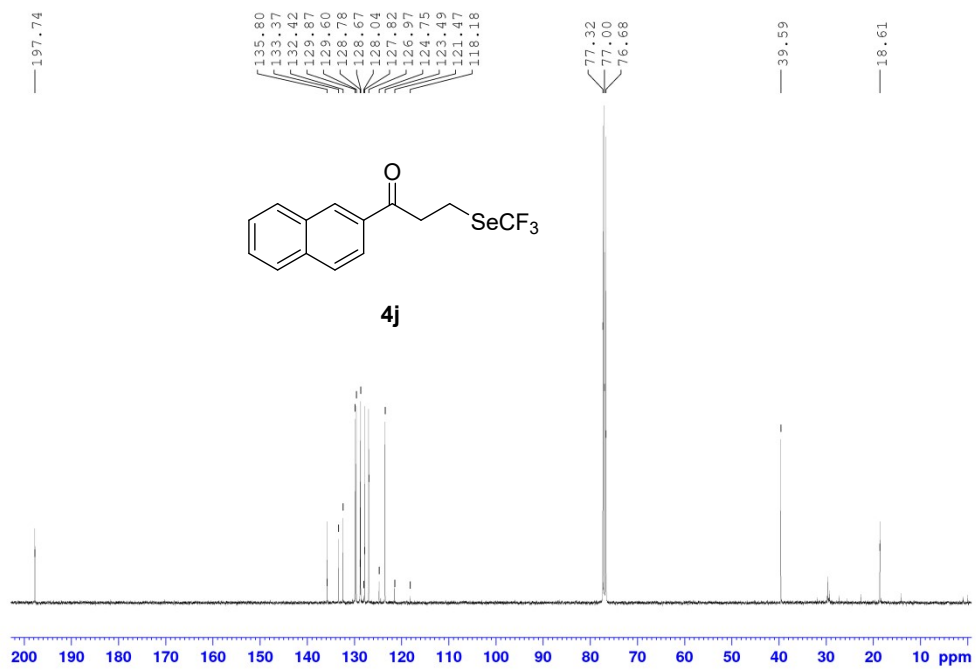

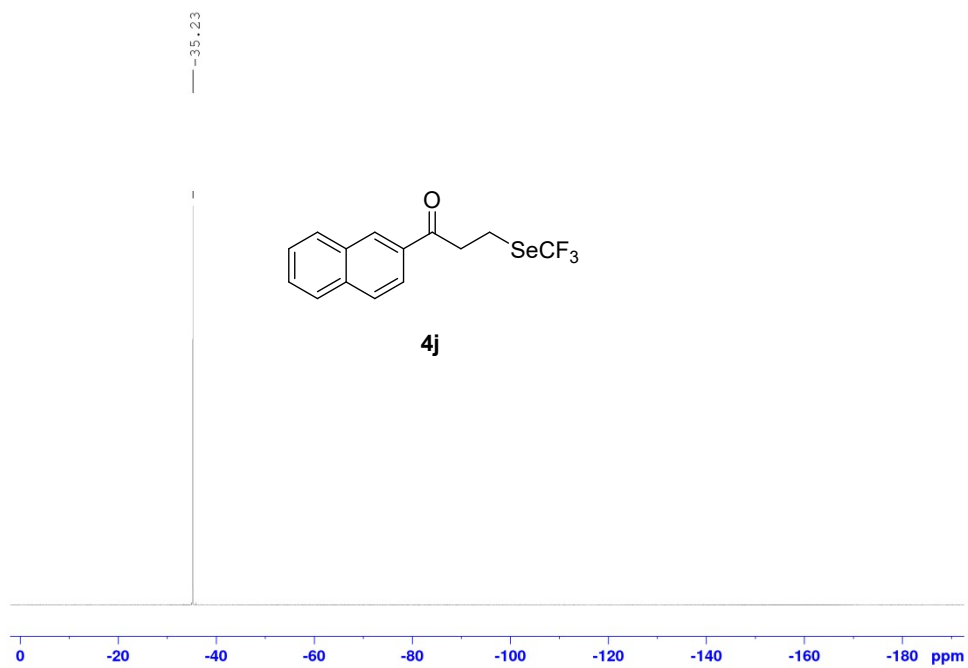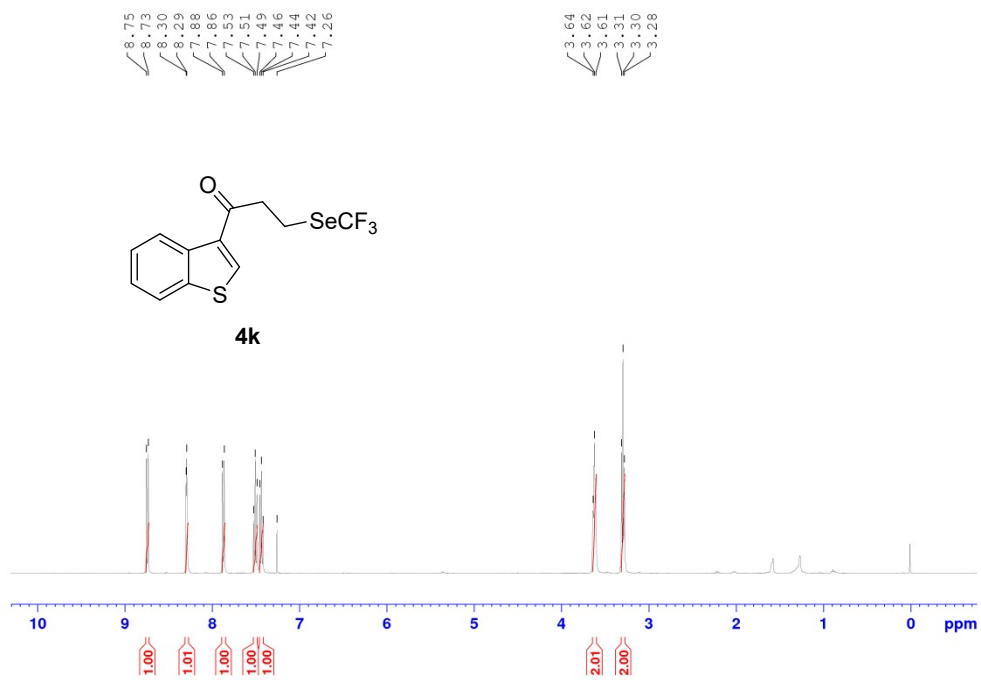

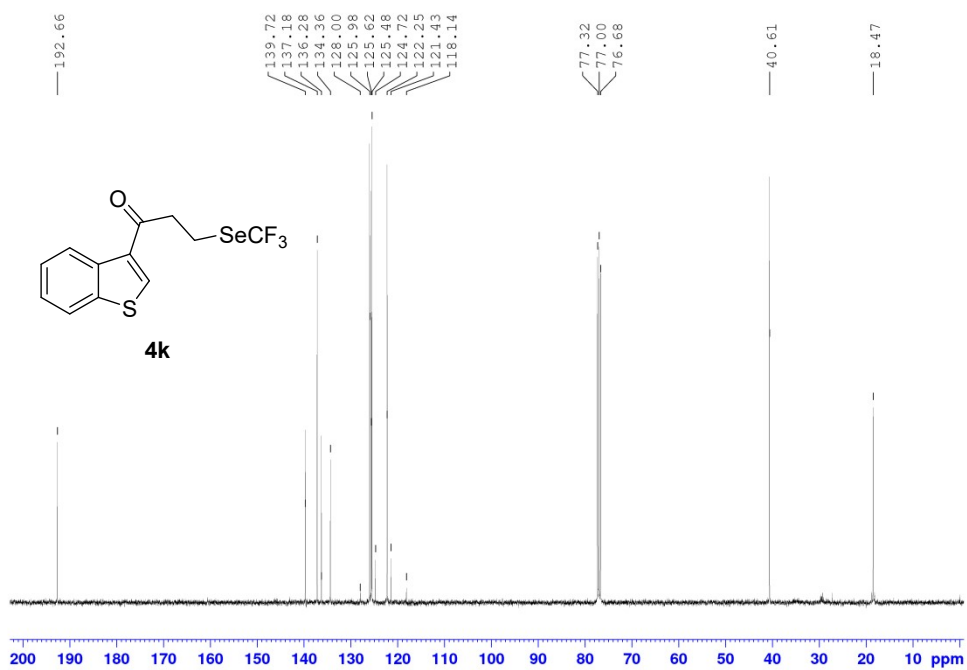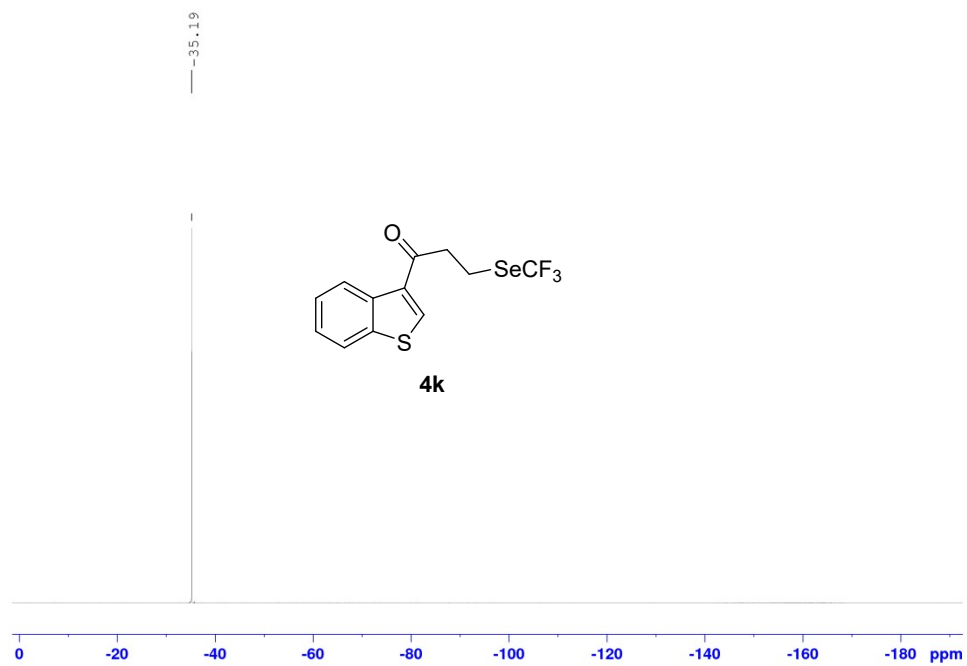

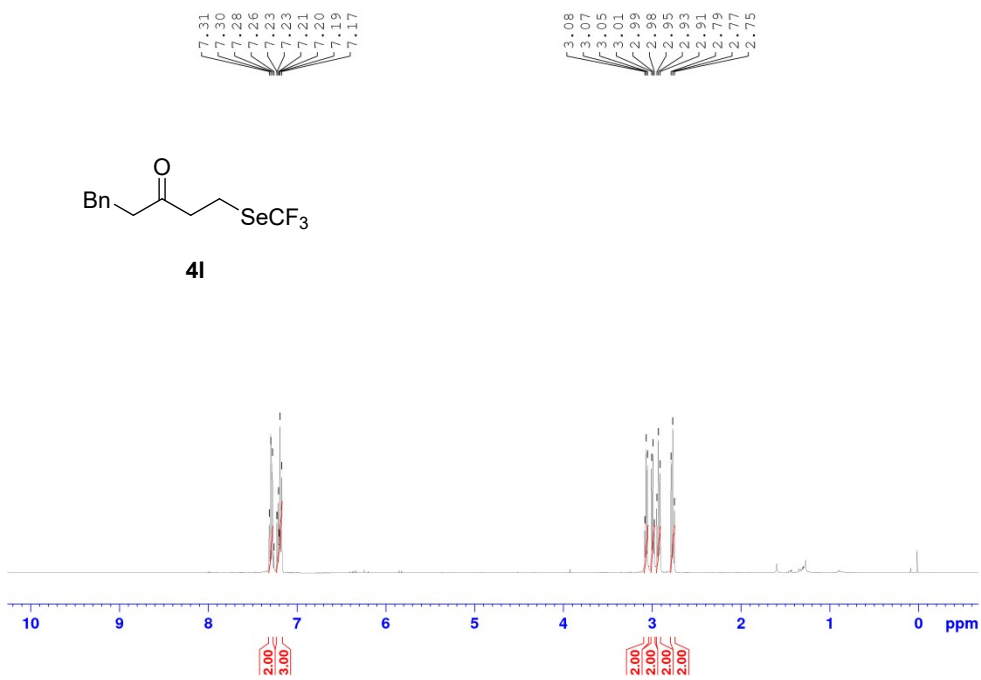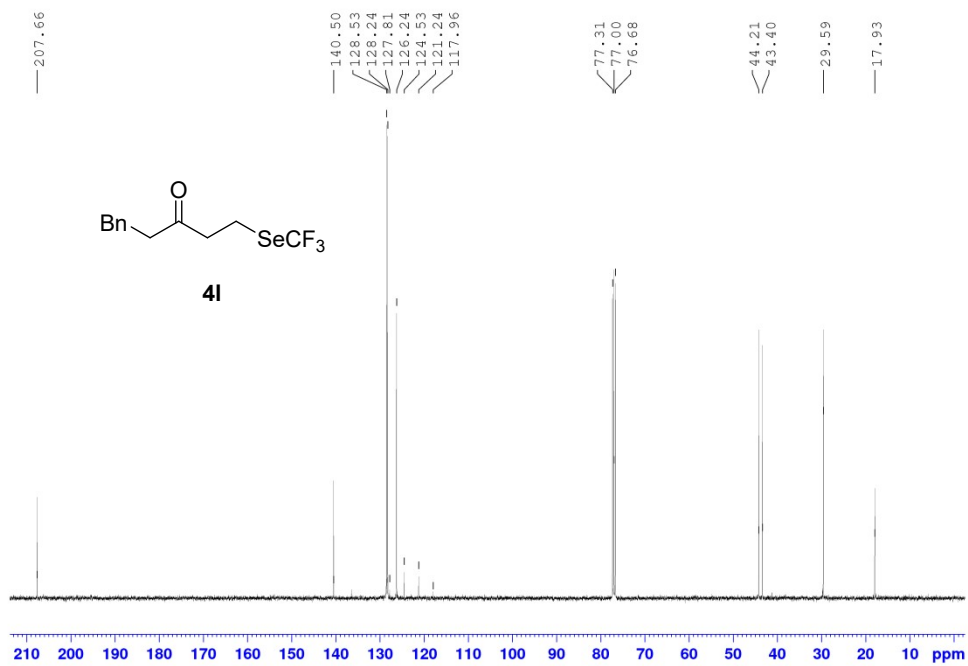

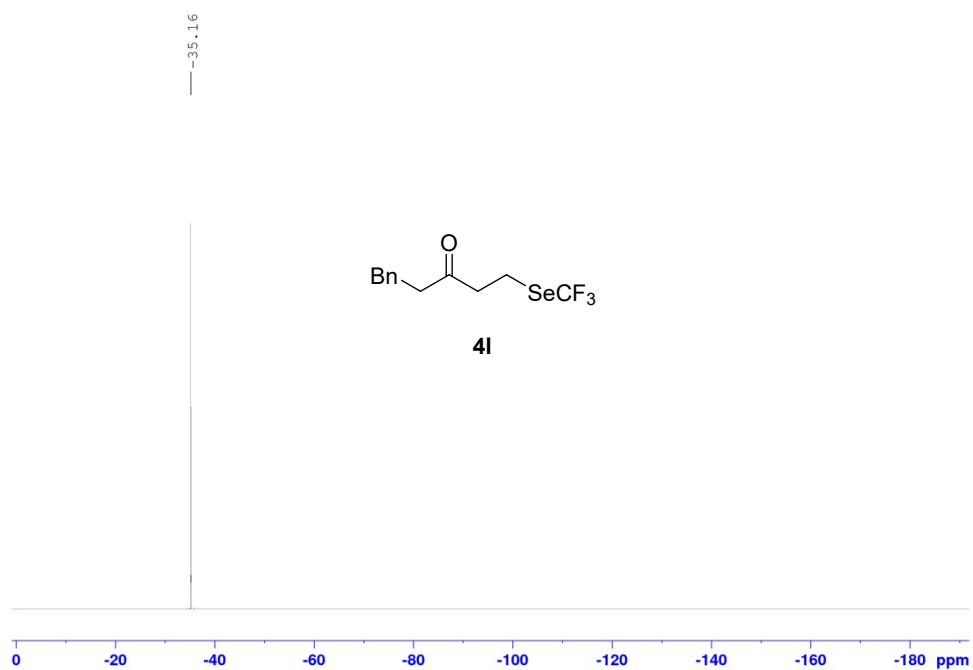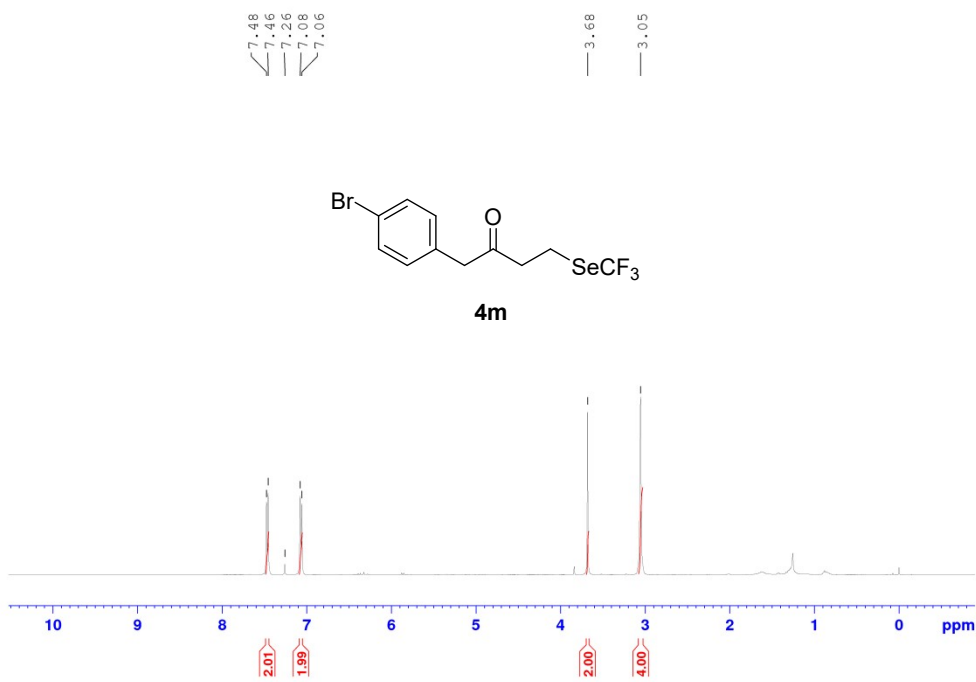

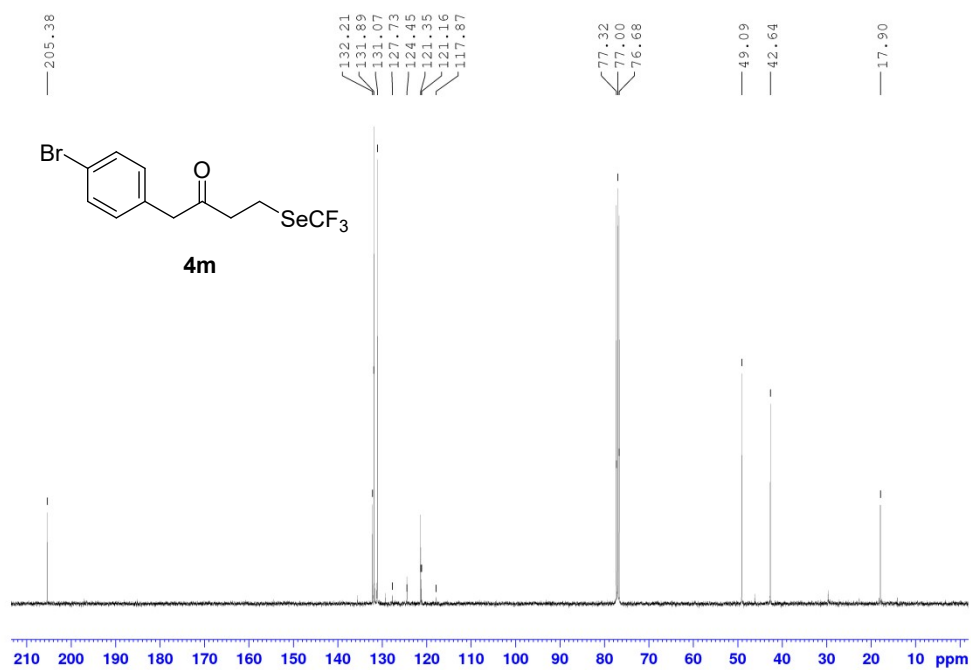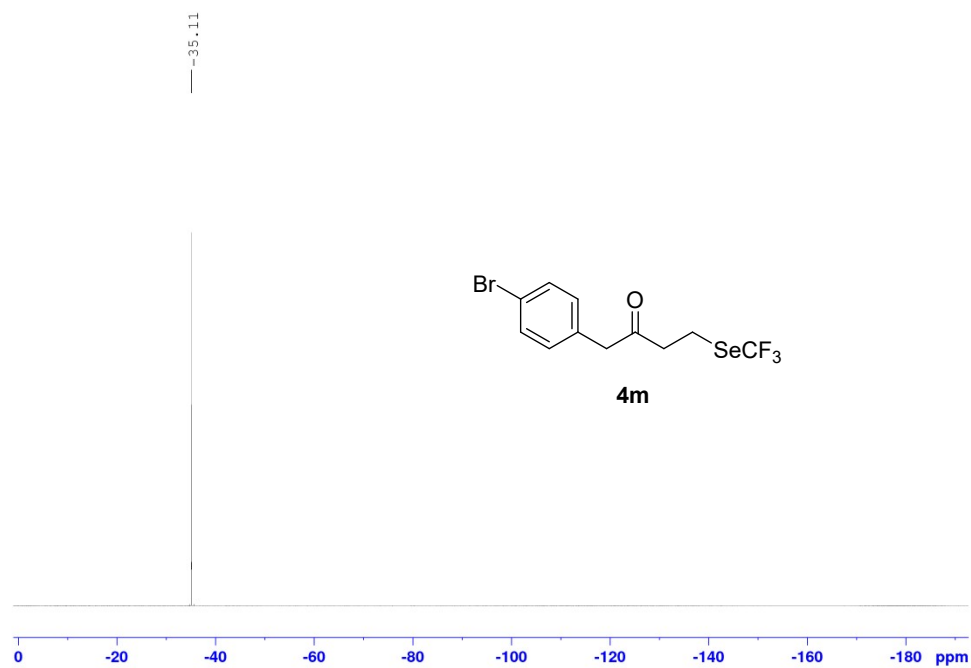

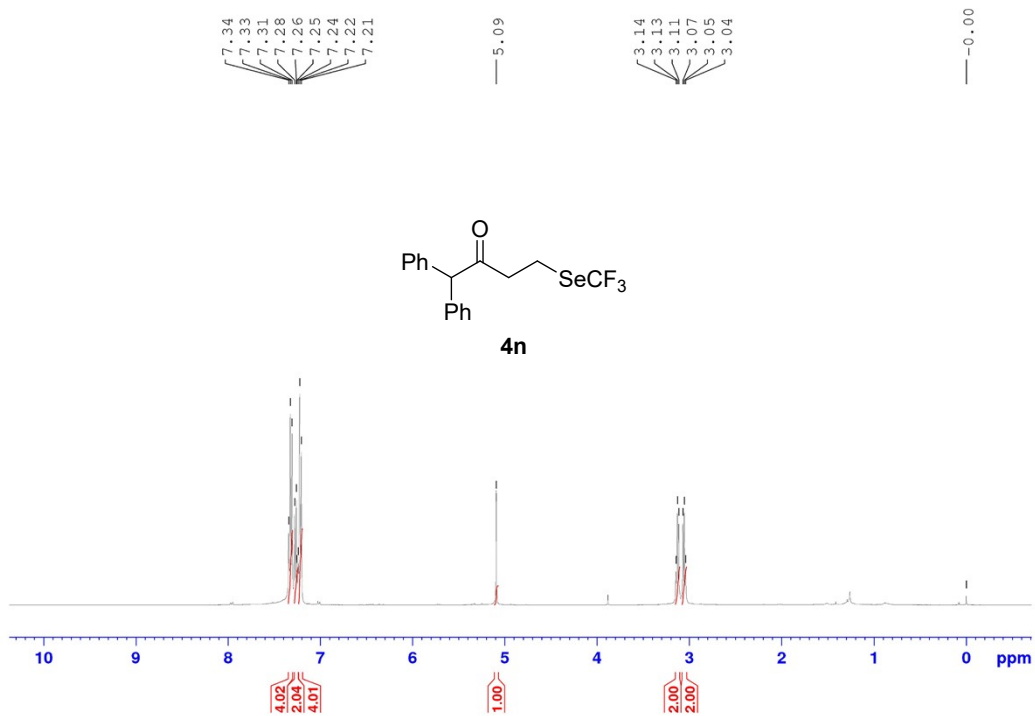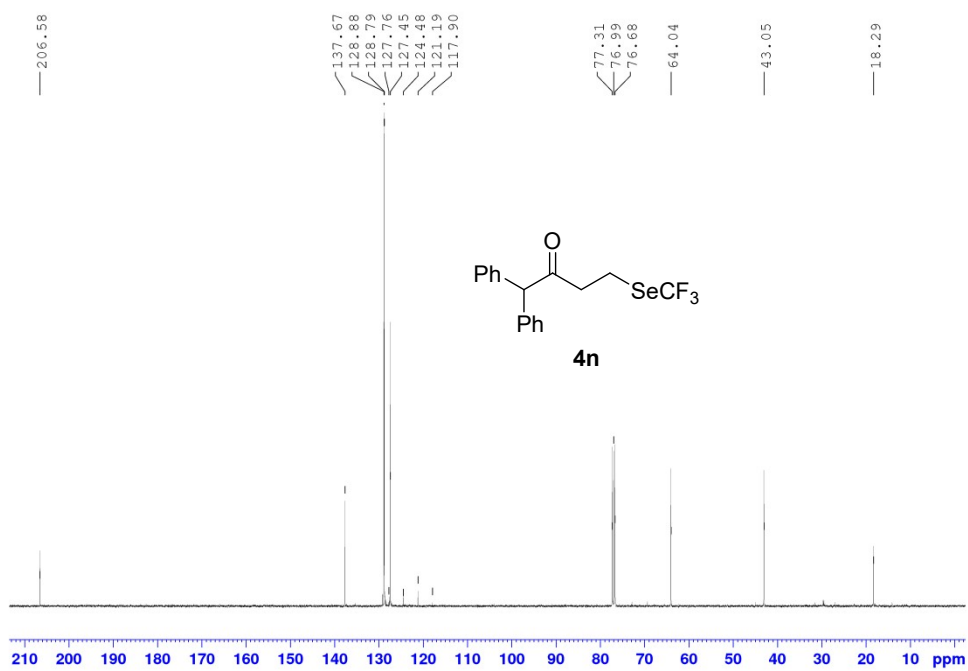

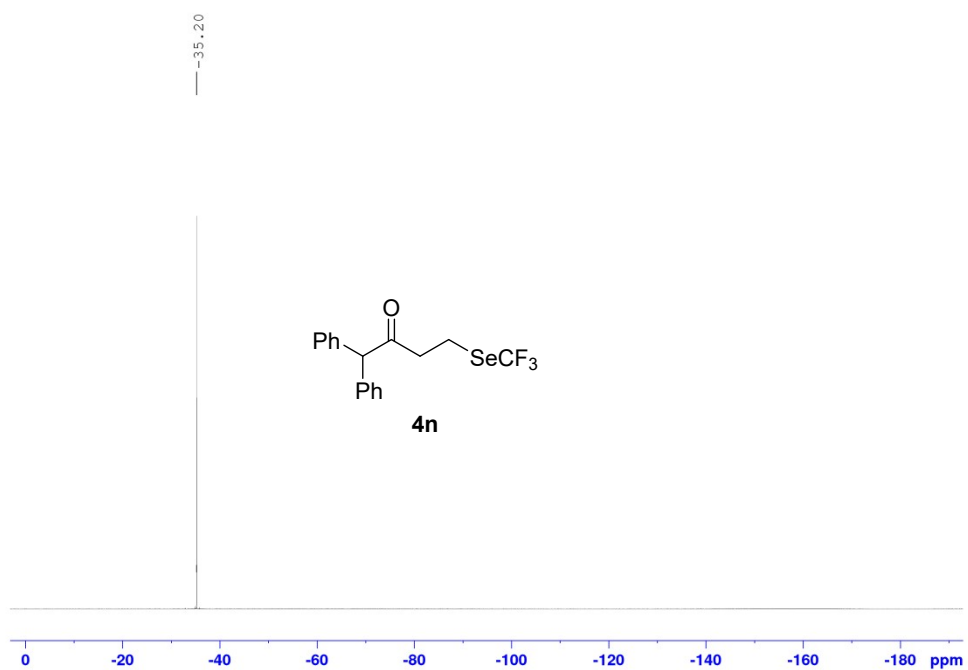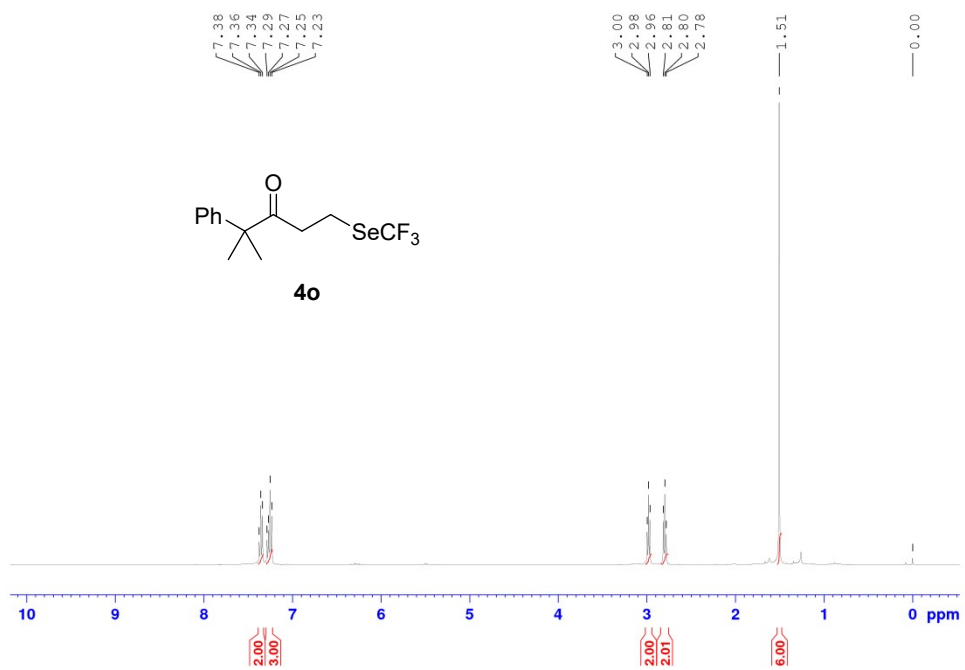



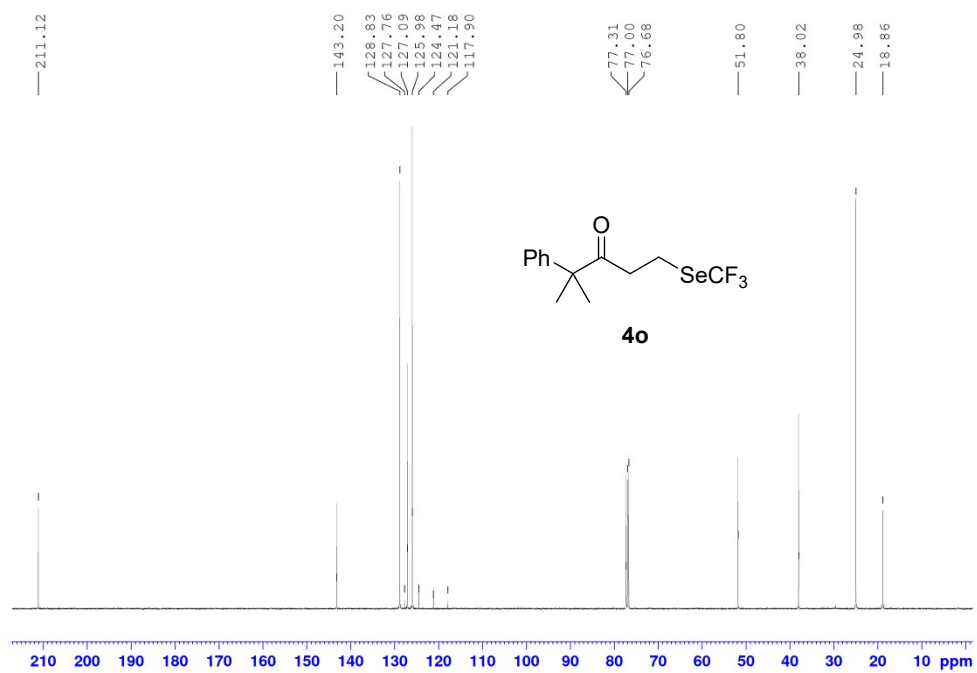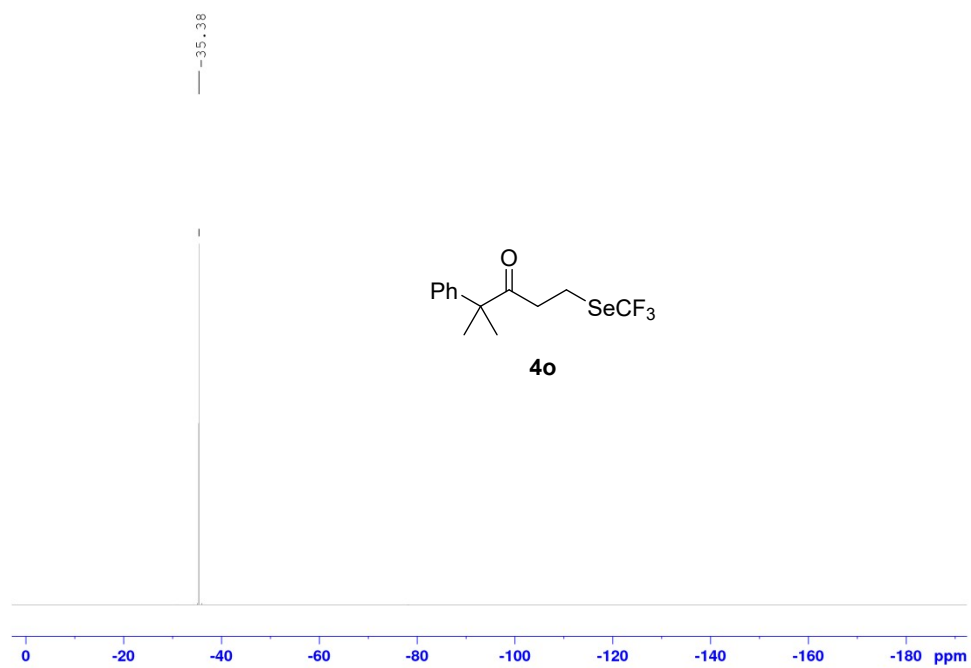

Supplement: d3ob00228d1.pdf [file d3ob00228d1.pdf]
